# Rapid volumetric brain changes after acute psychosocial stress

Uhlig, Marie <sup>1,2</sup>; Reinelt, Janis D. <sup>1</sup>; Lauckner, Mark E. <sup>1,3,11</sup>; Kumral, Deniz <sup>1,4</sup>; Schaare, H. Lina <sup>1,5,6</sup>; Mildner, Toralf <sup>7</sup>; Babayan, Anahit <sup>1,8</sup>; Engert, Veronika <sup>9,10</sup>; Villringer, Arno <sup>1,8</sup>; Gaebler, Michael <sup>1,8</sup>

<sup>1</sup> Department of Neurology, Max Planck Institute for Human Cognitive and Brain Sciences, Leipzig, Germany

<sup>2</sup> International Max Planck Research School NeuroCom, Leipzig, Germany

<sup>3</sup> Independent Research Group “Adaptive Memory”, Max Planck Institute for Human Cognitive and Brain Sciences, Leipzig, Germany

<sup>4</sup> Institute of Psychology, Neuropsychology, University of Freiburg, Freiburg im Breisgau, Germany

<sup>5</sup> Otto Hahn Group “Cognitive Neurogenetics”, Max Planck Institute for Human Cognitive and Brain Sciences, Leipzig, Germany

<sup>6</sup> Institute of Neuroscience and Medicine (INM-7: Brain and Behaviour), Research Centre Jülich, Germany

<sup>7</sup> NMR Group, Max Planck Institute for Human Cognitive and Brain Sciences, Leipzig, Germany

<sup>8</sup> MindBrainBody Institute at the Berlin School of Mind and Brain, Faculty of Philosophy, Humboldt-Universität zu Berlin, Berlin, German

<sup>9</sup> Institute of Psychosocial Medicine, Psychotherapy and Psychooncology, Jena University Hospital, Friedrich-Schiller University, Jena, Germany

<sup>10</sup> Independent Research Group “Social Stress and Family Health”, Max Planck Institute for Human Cognitive and Brain Sciences, Leipzig, Germany

<sup>11</sup> Medical Faculty of Leipzig University, Leipzig, Germany

## 28 Abstract (currently 212 of 250 words max.)

29 Rapid structural brain plasticity after acute stress has been shown in animals. It is  
30 unknown whether such stress-related brain changes also occur in humans, in which  
31 they have been found, using structural magnetic resonance imaging (MRI), after motor  
32 learning and visual stimulation. We here investigated grey matter volume (GMV)  
33 changes after acute stress in humans and tested their relation to psychophysiological  
34 stress measures.

35 Sixty-seven healthy men ( $25.8 \pm 2.7$  years) completed a standardized psychosocial  
36 laboratory stressor (Trier Social Stress Test) or a control version while blood, saliva,  
37 heart rate, and psychometrics were sampled. T1-weighted MP2RAGE images at 3T  
38 MRI were acquired 45 min before and 90 min after intervention onset. GMV changes  
39 were analysed using voxel-based morphometry. Associations with endocrine,  
40 autonomic, and subjective stress measures were tested with linear models.

41 We found significant group-by-time interactions in several brain clusters including  
42 anterior/mid-cingulate cortices and bilateral insula: GMV was increased in the stress  
43 group relative to the control group, in which several clusters showed a GMV decrease.  
44 We found no significant group-by-time interaction for other MRI parameters, including  
45 cerebral blood flow, but a significant association of GMV changes with state anxiety  
46 and heart rate variability changes.

47 In summary, we show rapid GMV changes following acute psychosocial stress in  
48 humans. The results suggest that endogenous circadian brain changes are  
49 counteracted by acute stress and generally emphasize the influence of stress on the  
50 brain.

51

52

53

54

## 55 Keywords (7)

56 [Humans](#), [Magnetic Resonance Imaging](#), [Brain](#), [Autonomic Nervous System](#), [Stress](#),  
57 [Psychological](#), [Neuroplasticity](#)

## 58 Introduction

59 A stressor is a real or imagined threat to an organism's integrity or well-being, which  
60 elicits a psychological and physiological stress response (Herman et al., 2003).  
61 Rapidly activated and rapidly terminated, the stress response is highly adaptive in  
62 situations of acute threat, but a chronically activated stress system can have  
63 detrimental effects and constitutes a major risk factor for physical and mental disease  
64 (McEwen & Gianaros, 2010). While the stress response is orchestrated by the brain,  
65 it involves the whole organism, particularly the autonomic nervous system and  
66 endocrine systems, with the hypothalamic-pituitary-adrenal axis (HPA axis) as a  
67 central component (Kemeny, 2003). In turn, brain structure and function can be  
68 affected by stress, and rapid structural brain plasticity after acute stress has been  
69 shown in animals (Kassem et al., 2013). In the current study, we investigated rapid  
70 stress-induced brain changes in humans with structural magnetic resonance imaging  
71 (MRI).

72 The stress response comprises a cascade of hormonal signals including corticotropin-  
73 releasing hormone (CRH), vasopressin, adrenocorticotrophic hormone (ACTH), and  
74 cortisol (Tsigos & Chrousos, 2002), which activates bodily functions to counteract the  
75 stressor. Most importantly, it triggers suppression of the immune system, faster  
76 glucose metabolization, and increased blood pressure (Cohen et al., 1991; Nesse et  
77 al., 2016). Being lipophilic, cortisol can cross the blood-brain barrier and, through its  
78 action on brain structures such as the hippocampus, terminate the stress response  
79 (Tasker & Herman, 2011; Joëls et al., 2013). This highlights the strong association of  
80 cortisol with long-term effects of stress on brain plasticity (McEwen & Gianaros, 2011),  
81 which occurs predominantly in regions involved in HPA axis regulation, such as  
82 prefrontal cortex (PFC), hippocampus, and amygdala (McEwen & Gianaros, 2011).  
83 Brain plasticity describes the brain's capacity to alter its structure and function to adapt  
84 to changing demands (Lövdén et al., 2010). Brain structure and function are thereby

85 inseparable, with structure constraining function and function shaping structure: In a  
86 supply-demand model, regional volume changes represent a continuous adaptation  
87 of the brain in supply (e.g., brain tissue) to changing environmental demands,  
88 mediated by alterations in activity (Lövdén et al., 2013). In support of this model, MRI  
89 studies often report a parallel development of structural and functional networks (He  
90 et al., 2007).

91 Stress-induced functional brain changes have been shown using MRI: During stress,  
92 the BOLD signal increased in prefrontal areas (Dedovic et al., 2009; Wheelock et al.,  
93 2016) and decreased in subcortical regions, including the hippocampus (Dedovic et  
94 al., 2009; Pruessner et al., 2008). Such stress-related brain changes in the PFC and  
95 subcortical regions also outlasted the stress task, which was ascribed to sustained  
96 vigilance or emotional arousal (Wang et al., 2005). Stress-related changes in  
97 functional connectivity have been shown in the salience network (Hermans et al.,  
98 2014), including the anterior cingulate cortex (ACC) and other cortical midline  
99 structures (Veer et al., 2011). These stress-related functional connectivity changes  
100 also correlated with individual cortisol trajectories (Veer et al., 2012). Analysing the  
101 resting-state fMRI from the experiment presented here, we previously found a stress-  
102 related increase in thalamic functional connectivity, which was linked to subjective  
103 stressfulness (Reinelt et al., 2019).

104 The link between chronic stress and structural brain changes in humans has been  
105 well-established (for a review see Radley et al., 2015): For example, stress-related  
106 psychopathologies have been associated with structural plasticity mainly in limbic and  
107 prefrontal areas (McEwen, 2005). Patients with post-traumatic stress disorder (PTSD)  
108 showed decreased GMV in the hippocampus (Chen et al., 2006; Karl et al., 2006),  
109 amygdala and ACC (Karl et al., 2006; Rogers et al., 2009). Also without a clinical  
110 diagnosis, higher levels of self-reported chronic stress have been associated with  
111 lower grey matter volume (GMV) in the hippocampus, amygdala, insula, and ACC  
112 (Ansell et al., 2012b; Lotze et al., 2020; Papagni et al., 2011).

113 In animal models, rapid stress-induced structural changes that have been detected  
114 within hours after acute stress exposure include attenuation of neurogenesis  
115 (marmosets: Gould et al., 1998, rats: Heine et al., 2004), changes in astrocyte density  
116 (in degus; Braun et al., 2009) or decreases in dendritic spine density (in mice; Chen

117 et al., 2010). In the latter study, a mediating function of the HPA axis in stress-induced  
118 memory deficits and associated brain structural changes was suggested.

119 Thus, while animal studies have found rapid structural brain changes after acute  
120 stress, these have - to our knowledge - not been shown in humans. We here used the  
121 Trier Social Stress Test (TSST, Kirschbaum et al., 1993), a strong and naturalistic  
122 psychosocial stressor in humans (Kirschbaum et al., 1993), and MRI to investigate  
123 structural brain plasticity.

124 In humans, structural brain changes are typically investigated using voxel-based  
125 morphometry (VBM; Ashburner & Friston, 2000; Draganski et al. 2004), which uses  
126 computational tissue classification based on T1-weighted images to detect differences  
127 in brain tissue composition. Numerous VBM studies have found rapid and spatially  
128 specific brain plasticity in response to exogenous stimuli such as training paradigms:  
129 for example, increased GMV in the motor cortex was found after one hour of balance  
130 training (Taubert et al., 2016) and after one hour of brain-computer-interface training  
131 in targeted brain regions (Nierhaus et al., 2021). Even after less active interventions,  
132 such as ten minutes of high-frequency visual stimulation (Naegel et al. 2017), or 263  
133 seconds of passive image viewing (Månsson et al. 2020), GMV changes were found  
134 with VBM.

135 The physiology behind VBM-derived GMV changes remains unclear<sup>1</sup>. Theoretically,  
136 genesis of neurons, glia cells and synapses as well as vascular changes could underlie  
137 structural MRI changes in GM (Zatorre et al., 2012). Supporting findings with stressful  
138 interventions (mentioned above; Chen et al., 2010; Braun et al., 2009), animal studies  
139 that combined MRI and histological examination after training interventions have  
140 suggested neural dendrites and astrocytes as drivers of rapid, experience-induced  
141 brain changes in structural MRI (Keifer et al., 2015; Sagi et al., 2012). Both can occur  
142 after minutes to hours (Johansen-Berg et al., 2012).

143 Not only interventions but also endogenous changes at different time scales can affect  
144 measures of GMV: Ageing is a strong predictor for GMV decreases (Karch et al.,  
145 2019), but rhythmic GMV changes have also been reported over the course of the  
146 menstrual cycle and its hormonal fluctuations (Barth et al., 2016; Lisofsky et al., 2015)

---

<sup>1</sup> While we use the term “grey matter volume” for VBM changes, we consider it a placeholder, as other physiological changes may contribute to the signal (see below).

147 or with the circadian rhythm (Karch et al., 2019; Nakamura et al., 2015; Orban et al.,  
148 2020; Trefler et al., 2016). Total GMV decreased linearly from morning to afternoon in  
149 several studies (Karch et al., 2019; Nakamura et al., 2015; Trefler et al., 2016),  
150 particularly in medial prefrontal areas and the precuneus (Trefler et al., 2016). In  
151 addition, CSF increased over the course of the day (Trefler et al., 2016) whereas total  
152 white matter decreased in one study (Trefler et al., 2016), but was not associated with  
153 time of day in another (Karch et al., 2019). The circadian system and the stress system  
154 both maintain homeostasis by adapting to environmental conditions, and they strongly  
155 interact on the physiological level with the HPA axis, which is a major component of  
156 both systems (Nader et al., 2010; Nicolaidis et al., 2014).

157 Rapid GMV changes may also occur with alterations in the participant's physiological  
158 state during MRI, for example by changes in hydration (Streitbürger et al., 2012) or  
159 osmolality (Höflich et al., 2017; Streitbürger et al., 2012). Furthermore, vascular  
160 changes can impact VBM results, because blood and GM have similar T1 relaxation  
161 values at 3T (Tardif et al., 2017; Wright et al., 2008), and changes in blood oxygenation  
162 and tissue oxygenation (Tardif et al., 2017) or cerebral blood flow (CBF; Franklin et  
163 al., 2013; Ge et al., 2017) may “masquerade” as changes in VBM-derived GMV. To  
164 specify the stress-related structural plasticity found with VBM and clarify the  
165 contribution of vasculature, we complemented VBM with other MRI measures: CBF  
166 measured with pulsed arterial spin labeling (pASL) and quantitative T1. An increase in  
167 T1 values would be consistent with a shift towards T1 values of blood and has been  
168 discussed as an increase in vascular tissue in the context of training-induced plasticity  
169 (Thomas et al., 2018). On the other hand, increased oxygenation following a breathing  
170 challenge has been shown to decrease T1 values (Tardif et al., 2017), which has been  
171 ascribed to the so-called tissue oxygenation-level dependent (TOLD) contrast  
172 (Haddock et al. 2013). To investigate differences between T1 maps, T1-weighted  
173 images and (preprocessed) VBM images, we also analysed intensity values from  
174 (unpreprocessed) T1-weighted (UNI) images within the VBM clusters.

175

176 To summarize, rapid GMV changes have been detected in humans upon exogenous  
177 stimulation and with endogenous fluctuations, and in animals following stress  
178 exposure. We hypothesized that acute stress, as a relevant exogenous stimulus  
179 triggering an endogenous process (i.e., the stress response), can induce rapid



180 changes in GMV measured with MRI. To test this hypothesis, we had young, healthy  
181 men complete either a psychosocial stress test (Trier Social Stress Test, TSST;  
182 Kirschbaum et al., 1993) or a closely related control intervention without a  
183 psychosocially stressful component (Placebo-TSST; Het el al., 2009). Before and after  
184 the intervention, we acquired MRI data. Throughout the entire experiment, we  
185 regularly sampled autonomic, endocrine, and subjective markers of the stress  
186 response (Figure 1).

187 As stress-induced brain changes have often been reported in the amygdala and the  
188 hippocampus (see above), they served as regions-of-interest (ROIs), complemented  
189 by an exploratory whole-brain analysis. To better depict the physiology of stress-  
190 induced brain changes, we also compared CBF and quantitative T1 values before and  
191 after the intervention. Additionally, we investigated the relation between GMV changes  
192 and the other (i.e., autonomic, endocrine, and subjective) stress measures.

## 193 Methods

### 194 Participants

195 We recruited male participants between 18 and 35 years of age via leaflets, online  
196 advertisements, and the participant database at the Max Planck Institute for Human  
197 Cognitive and Brain Sciences in Leipzig. Exclusion criteria, as assessed in a telephone  
198 screening, were smoking, excessive alcohol / drug consumption, past or current  
199 participation in psychological studies, regular medication intake, history of  
200 cardiovascular or neurological diseases, and a BMI higher than 27. In addition,  
201 standard MRI exclusion criteria applied, such as tattoos, irremovable metal objects  
202 (e.g., retainers, piercings), tinnitus, and claustrophobia.

203 We tested 67 young, healthy males. Because of an incidental medical finding, one  
204 participant was excluded, so that 66 participants (age:  $25.8 \pm 2.7$ , 21-32 years) entered  
205 the analyses, 32 in the stress and 34 in the control group.

206 On separate days prior to the stress/control paradigms, participants underwent  
207 extensive baseline measurements that included cognitive testing, blood screening,  
208 anthropometrics, structural and resting-state functional MRI scans, resting-state

209 electroencephalography (EEG), self-report questionnaires, and a structured clinical  
210 interview (for details, see Babayan et al., 2019). If exclusion criteria were detected  
211 during the baseline assessment, participants were excluded from further testing.  
212 Included participants were randomly assigned to either the stress or the control group.  
213 To avoid experimenter biases, the administrative staff remained blind to the testing  
214 condition until the first MRI session. All appointments were scheduled for the same  
215 time of day (11:45 am) to control for diurnal fluctuations of hormones (e.g., cortisol and  
216 ACTH; Nader et al., 2010; Nicolaides et al., 2014). Participants were asked to sleep  
217 at least 8 hours in the night before the experiment, to get up no later than 9 am, have  
218 a normal breakfast and to not eat or exercise until their study appointment while also  
219 refraining from drinking coffee, black tea, or other stimulant drinks. Written informed  
220 consent was obtained from all participants. The study was approved by the ethics  
221 committee of the medical faculty at Leipzig University (number 385-1417112014), and  
222 participants were financially compensated.

223 Stress and the control groups did not differ significantly in age, hours of sleep on the  
224 day of testing, average sportive activity per week, or self-reported chronic stress  
225 (Reinelt & Uhlig et al., 2019).

## 226 Procedure

227 The pre-scan was completed on average 45 (SD:  $\pm 3.9$ ) min before intervention onset  
228 (before two resting-state fMRI scans, see Figure 1), and the post-scan was completed  
229 on average 88 (SD:  $\pm 3.6$ ) min after intervention onset (between four resting-state fMRI  
230 scans, see Figure 1).

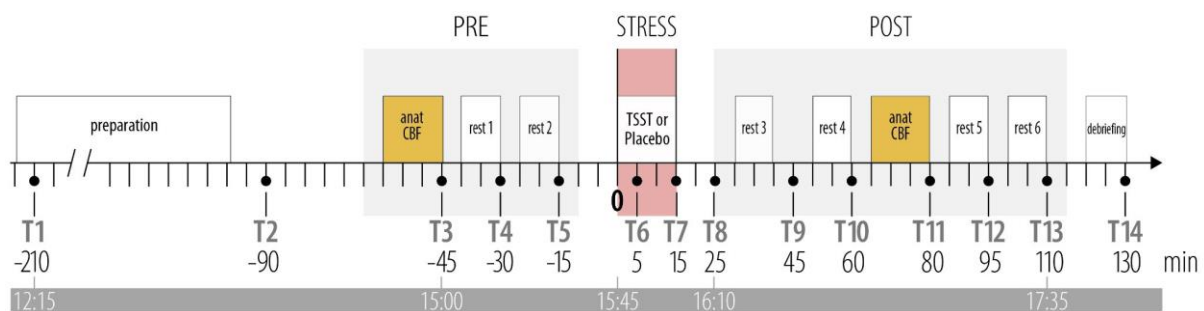

231

232 **Figure 1.** Schematic overview of the experiment: Between-subject design with the stress  
233 group (n = 33) undergoing the Trier Social Stress Test (TSST) and the control group (n = 34)  
234 a placebo-TSST. Orange boxes indicate two anatomical scans (anat) using T1-weighted MRI  
235 (MP2RAGE) and two scans of pulsed arterial spin labelling for cerebral blood flow (CBF).



236 Psychometric ratings, saliva samples, and blood samples were acquired at 14 time points  
237 throughout the experiment (T1-T14). Minutes are relative to the onset of the intervention  
238 (TSST or placebo-TSST), while the bottom bar informs about the time-of-day. The grey boxes  
239 indicate phases in the MRI. (The TSST and the placebo-TSST took place outside of the MRI.)

## 240 Intervention

241 Each participant completed either a psychosocial stress test (Trier Social Stress Test,  
242 TSST; Kirschbaum et al., 1993) or the placebo-TSST as control intervention, which  
243 tightly controls for physical and cognitive load during the TSST (Het et al., 2009).

244 Participants in the stress group prepared for (5-min) and completed a job interview (5-  
245 min) as well as a difficult mental arithmetic task (5-min) in front of a committee (one  
246 female, one male professional actor), introduced as two professional psychologists  
247 trained in the analysis of nonverbal communication. Additionally, the task was  
248 recorded by a video camera and microphone. In the control condition, participants  
249 prepared (5-min) and spoke about their career aims (5-min) and solved an easy mental  
250 arithmetic task (5-min) with nobody else in the room and no video or audio recording.  
251 To extend the stressfulness of the TSST, participants in the stress group were told that  
252 a second task would follow during the scanning procedure. To make this scenario  
253 more plausible, participants were brought back to the scanning unit in the company of  
254 the experimenter *and* the TSST committee members. Only after rest 4, before the  
255 anatomical scan (+60 min after TSST onset), they were told that no additional task  
256 would follow. For a more detailed description of the interventions, see supplementary  
257 material and Reinelt & Uhlig et al. (2019).

258 Throughout the experiment, blood was sampled at 14 time points, and saliva and  
259 subjective ratings at 15 time points. At each sampling point, participants completed  
260 psychometric questionnaires, while autonomic and endocrine data were acquired. For  
261 further details, see below as well as Reinelt & Uhlig et al. (2019) and Bae & Reinelt et  
262 al. (2019).

## 263 Magnetic resonance imaging

### 264 Acquisition

265 MRI was performed on a 3T MAGNETOM Verio (Siemens AG, Erlangen, Germany)  
266 scanner with a 32 channel Siemens head-coil. The MP2RAGE sequence was used to  
267 acquire structural MR images. The MP2RAGE sequence yields a nearly bias-free T1-  
268 weighted (UNI) image, which is created by combining the two inversion images (INV1,  
269 INV2) and it produces a quantitative T1 map (T1) (Marques et al., 2010). The high-  
270 resolution MP2RAGE sequence had the following parameters (Marques et al., 2010):  
271  $T_{I1} = 700$  ms,  $T_{I2} = 2500$  ms,  $TR = 5000$  ms,  $TE = 2.92$  ms,  $FA1 = 4^\circ$ ,  $FA2 = 5^\circ$ , 176  
272 slices, voxel dimensions = 1 mm isotropic.

273 Cerebral blood flow (CBF) was measured using the pulsed arterial spin labeling  
274 (pASL) sequence from Siemens (PICORE). For a detailed description of the pASL  
275 data acquisition, preprocessing, analysis and results, see supplement.

### 276 Preprocessing

277 *VBM*: For each scan (pre-intervention, post-intervention), a brain mask was created  
278 from the INV2-images to remove the noisy background of the UNI images, which is a  
279 by-product of the division of the two inversion images. These denoised T1-weighted  
280 images were preprocessed using the longitudinal preprocessing pipeline (with default  
281 settings, Version 1450 (CAT12.6) 2019-04-04) of the CAT12 toolbox  
282 (<http://www.neuro.uni-jena.de/cat/>) including intra-subject realignment, bias  
283 correction, segmentation, spatial registration to MNI space, segmentation into three  
284 tissue types (grey matter, white matter, and cerebrospinal fluid). Finally, the images  
285 were smoothed with a Gaussian kernel at 8 mm full-width at half maximum (FWHM).  
286 For further analysis, the segmented grey matter images were used.

287 *T1 & T1-weighted*: The denoised T1-weighted images were warped to MNI-space  
288 (using the *normalize:estimate&write* function in SPM). T1 maps were normalized to  
289 MNI space by applying the deformations from the normalization of the T1-weighted  
290 images. The normalized T1-weighted and T1 images were masked with the same  
291 sample-specific GM mask, which was used for the VBM-analysis before smoothing  
292 with an 8-mm FWHM Gaussian kernel.

293 CBF: PASL data was preprocessed using an inhouse Matlab analysis pipeline, which  
294 included motion correction with linear regression. Images were realigned with FSL  
295 *McFlirt* and smoothed with a 2D spatial Gaussian filter of 3-mm FWHM (for details,  
296 see supplement).

## 297 Postprocessing

298 For post-hoc analyses (see below for details), significant ( $p_{FWE} < 0.05$ ) VBM clusters  
299 were saved as binarized NIfTI images from the result GUI and used as masks for post-  
300 hoc tests and to investigate changes in T1 and T1-weighted intensity values as well  
301 as CBF. For binarizing masks, multiplication with masks and extraction of GMV, T1  
302 and T1-weighted intensity values, FSL was used (*fslmaths* & *fslstats* in *fslutils*,  
303 (Jenkinson et al., 2012)).

304 *VBM post-hoc*: GMV values were extracted by multiplying binary masks of VBM  
305 clusters with the smoothed, preprocessed GM images and extracting the average  
306 value from each cluster.

307 *T1 & T1-weighted*: Values were extracted by multiplying binary masks of VBM clusters  
308 with the smoothed and normalized T1 and T1-weighted images and extracting the  
309 average value from each cluster. Additionally, average values from GM voxels outside  
310 of the VBM clusters were extracted to serve as a reference for potential global changes  
311 in T1 values or T1-weighted intensity values. Therefore, the smoothed, GM masked  
312 images were multiplied with an inverse binary VBM-cluster mask.

313 *CBF*: For the CBF analysis, the masks were resampled to a 2-mm isotropic voxel size  
314 to match the pASL images using the *coregister:reslice* function in SPM12. The  
315 preprocessed CBF maps were multiplied with binary masks for VBM clusters and the  
316 average CBF value for each cluster was extracted. As the pASL data is acquired within  
317 a manually defined slab, not all VBM clusters were fully covered (see Figure S1). Only  
318 clusters, in which CBF data was available for at least 70% of voxels were included in  
319 the post-hoc CBF analysis.

## 320 Anatomical regions-of-interest definition

321 To test our regional hypotheses, anatomical regions-of-interest (ROIs) were created  
322 as binary masks of hippocampus and amygdala using the Anatomy toolbox (Eickhoff

323 et al., 2005) and resampled to 1.5-mm space using SPM12 to match the anatomical  
324 images. ROI values were extracted by multiplying masks with the smoothed,  
325 modulated, warped, coregistered images using FSL (*fslmaths* & *fslstats* in *fslutils*,  
326 Jenkinson, et al., 2012). Below, “Hippocampus” and “Amygdala” (with capitalized first  
327 letters) refer to these anatomical ROIs.

## 328 Quality assessment

329 Image quality was assessed using the noise-to-contrast ratio (NCR), a quality  
330 parameter computed by the CAT12 toolbox from noise, bias and white-matter  
331 hyperintensities. Based on within-sample comparisons, data from participants whose  
332 image quality (NCR) was more than 3 standard deviations (SD) below the sample  
333 mean were excluded (see supplementary material). Systematic changes in image  
334 quality were tested with a linear mixed model, which showed a significant group-by-  
335 time interaction effect for NCR ( $X^2(1)=7.9$ ;  $p=0.0049$ ; see supplement), driven by a  
336 significant decrease in image quality in the control group ( $t\text{-ratio}=3.3$ ,  $p=0.0016$ ). Head  
337 movement can negatively influence image quality in MRI (Power et al., 2015) as well  
338 as estimates of GMV and cortical thickness (Reuter et al., 2015). As no information  
339 about head movement was available from the MP2RAGE data, we calculated mean  
340 framewise displacement (MFD) as the sum of the absolute values of the six  
341 realignment parameters (Power et al., 2015) from the resting-state fMRI scans that  
342 directly preceded the MP2RAGE scan. Accounting for head motion by including MFD  
343 into the above model weakened the group-by-time interaction effect for NCR  
344 ( $X^2(1)=3.7$ ;  $p=0.059$ ). Furthermore, a non-significant trend for an effect of MFD on  
345 NCR ( $F(1)=3.4$ ,  $p=0.068$ ) was found, suggesting an association between the two  
346 quality parameters. To avoid circular analyses (since NCR was derived from the data),  
347 we included MFD in our statistical models to account for quality changes on volume  
348 estimates.

349 For extracted T1 and T1-weighted intensity values, values outside the range of 3 SD  
350 above sample mean were excluded (for details, see respective section below).

351 The quality assessment of CBF data is described in the supplement.

## 352 Psychophysiological stress measures

### 353 Autonomic

354 Heart rate (HR) and heart rate variability (HRV) were analysed from recordings of  
355 electrocardiography (ECG) and photoplethysmography (PPG). A detailed description  
356 of autonomic data acquisition and data preprocessing can be found in Reinelt & Uhlig  
357 et al. (2019). Autonomic recordings were binned into three-minute intervals. The  
358 average interbeat interval (the inverse HR) was determined for each interval and HRV  
359 was quantified as the square root of the mean squared differences of successive  
360 differences (RMSSD) in interbeat intervals, indexing parasympathetic cardio-  
361 regulation (e.g., Malik et al., 1996).

### 362 Endocrine

363 Saliva was sampled with a Sarstedt Salivette (Sarstedt, Nümbrecht, Germany) for at  
364 least 2 min per sample. Blood samples (serum and plasma; Sarstedt Monovette) were  
365 acquired by the experimenter from a intravenous catheter in the left or right cubital  
366 vein. Saliva and blood samples were analysed using Liquid chromatography-tandem  
367 mass spectrometry (LC-MS/MS) at the Institute for Laboratory Medicine, Clinical  
368 Chemistry and Molecular Diagnostics, University of Leipzig, following the protocol  
369 described in (Gaudl et al., 2016). Saliva cortisol and plasma ACTH were used to  
370 assess the association of GMV changes with endocrine stress measures at different  
371 times of HPA axis activation: ACTH, which is secreted earlier during HPA axis  
372 activation, peaked at 15 min after stressor onset, while saliva cortisol, a particularly  
373 robust stress marker (Vining et al., 1983), peaked at 25 min after stressor onset. A  
374 detailed analysis of changes in endocrine markers and their timing in the current study  
375 can be found in (Bae et al., 2019). Participants with a cortisol increase below 1.5 nmol/l  
376 following psychosocial stress exposure can be considered non-responders and are  
377 often excluded from analyses including endocrine data (Miller et al., 2013).

### 378 Subjective

379 We presented questionnaires with OpenSesame 3.1.2 (Mathôt et al., 2012) on a laptop  
380 (outside MRI) or on a screen (inside MRI). Participants answered the questions with  
381 two keys on the laptop keyboard (outside MRI) or with a button box (inside MRI). For

382 this analysis, subjective stress was assessed with the state trait anxiety questionnaire  
383 (STAI, sum score of the state subscale; (Laux, 1981; Laux & Spielberger, 2001) and  
384 the individual stressfulness question “How stressed do you feel right now?”, which was  
385 answered using a visual analogue scale (VAS) with a sliding bar from 0 (“not at all”) to  
386 100 (“very much”).

## 387 Statistical Analysis

### 388 Analysis of neuroimaging data

#### 389 Whole-brain analysis in SPM

390 Following quality assessment, three participants (two in the stress group) were  
391 excluded from the VBM analysis because of an NCR value more than 3 SD below the  
392 sample mean. The final VBM sample therefore consisted of 63 participants, 30 in the  
393 stress group and 33 in the control group. For statistical analysis of the MRI data, delta  
394 images were created by subtracting the pre-intervention image from the post-  
395 intervention image. A two-sample t-test was performed on the difference images to  
396 investigate the group-by-time interaction. To focus the analysis on GM, thresholding  
397 is typically used in VBM analyses (e.g. Streitbürger et al., 2012). Since the voxel values  
398 in delta images describe a difference rather than the tissue probability itself, they could  
399 not be thresholded. Instead, we used a sample-specific GM mask. This mask is  
400 automatically created during model estimation in SPM; in our case a one-sample t-test  
401 on all smoothed, segmented GM images while applying an absolute masking threshold  
402 of 0.1 (probability of this voxel being GM).

403 The total intracranial volume (TIV) was estimated for both images (pre-intervention,  
404 post-intervention) of each subject using CAT12 and their average was included as a  
405 covariate. To account for potential systematic, group-specific changes in image quality  
406 (see the section “Quality assessment” above and supplement), MFD was included as  
407 a proxy for head motion as an additional covariate. The results from the two-sample t-  
408 test on  $\Delta$ grey matter images ( $\Delta$ GM) were investigated using two-sided t-contrasts (i.e.,  
409 control>stress [1 -1 0 0] and control<stress [-1 1 0 0] with TIV and MFD in columns 3  
410 and 4).



411 To minimize false positive and false negatives results, we used whole-brain threshold-  
412 free cluster enhancement (TFCE), a non-parametric multiple-comparison correction  
413 that does not require a cluster extent threshold, using the TFCE-toolbox  
414 (<http://dbm.neuro.uni-jena.de/tfce>) with the default settings of 5000 permutations and  
415 the Smith-permutation method. Anatomical labels for significant clusters were found  
416 using the DARTEL-based “neuromorphometrics atlas” provided with the CAT12  
417 toolbox. Below, we use capitalization to indicate the extracted anatomical labels (e.g.,  
418 “Superior Medial Frontal Gyrus”)

419 Analysis of extracted imaging markers

420 Statistical analysis at the ROI level was performed using R 3.0.2 (R Core Team (2013);  
421 <http://www.R-project.org/>). Group differences in variables-of-interest over time were  
422 investigated with linear mixed models (LMMs; using the *lme4* package; (Bates et al.,  
423 2015), which included a random intercept for each subject to account for inter-  
424 individual differences. Visualizations were created in R using *ggplot* (Wickham, 2009).  
425 The raincloud plots were adapted (Allen et al., 2019).

426 Linear mixed model design

427 Across all analyses, the model was built following the same procedure (the full scripts  
428 can be found on <https://gitlab.gwdg.de/necos/vbm.git>):

- 429 1. A null model including a random intercept, covariates of no interest, as well as  
430 reduced fixed effects was set up and compared to a full model (Forstmeier &  
431 Schielzeth, 2011).
- 432 2. The full model was identical to the null model except for the effect of interest, in  
433 most cases the group-by-time(-by-cluster) interaction or other (i.e., autonomic,  
434 endocrine, or subjective) stress measures when testing their associations with  
435 GMV.
- 436 3. The difference between the full and the null model was tested using the *anova*  
437 function and setting the argument *test* to “chisq” to do a  $X^2$  (Chi<sup>2</sup>) test.
- 438 4. The *drop1* function was used to extract the results from the individual effects.
- 439 5. Non-significant interactions were dropped from the full model to reduce  
440 complexity (reduced model).

441 6. In case of significant interactions, the effects at the individual levels of  
442 predictors (e.g., within-group or for each cluster) were analyzed post-hoc using  
443 the *emmeans* & *contrast* function with *Holm* correction from the *emmeans*  
444 package (Lenth, 2021). Estimated marginal means and 95% confidence  
445 intervals obtained with *emmeans* were used for plotting.

446

447 We tested the assumptions for LMMs by visually inspecting the distribution of residuals  
448 in a QQplot and a scatterplot of the residuals plotted against fitted values. The main  
449 criterion for the latter was symmetry along the y-axis. Influential cases were identified  
450 and excluded. Multicollinearity was tested by extracting the variance inflation factor  
451 (VIF), using the *vif* function in the *car* package (Fox & Weisberg, 2018). To increase  
452 the likelihood of symmetrically distributed residuals, distribution of all variables was  
453 estimated visually using histograms, and data was transformed (default: natural  
454 logarithm) when data distribution appeared asymmetrical. The covariate MFD was  
455 also log-transformed and both covariates of no interest, TIV and  $\log_e(\text{MFD})$  were z-  
456 transformed to increase interpretability of the results (Schielzeth, 2010).

457

458 *Post-hoc analysis of VBM results:* Post-hoc analysis in significant VBM clusters was  
459 performed to confirm SPM analyses, in which the 2-by-2 design (group-by-time) was  
460 reduced to a two-sample t-test over the difference images (post- minus pre-  
461 intervention). The full model included the main effects, all two-way interactions, and  
462 the three-way interaction of group, time, and cluster (plus covariates  $\log_e(\text{MFD})$  and  
463 TIV), while the null model lacked all interactions. GMV values were square-root  
464 transformed. If the three-way interaction was not significant, it was excluded from the  
465 full model (reduced model).

466 In addition to the “global” model including all clusters, group-by-time interaction  
467 effects were additionally tested in “local” models for each cluster separately, which  
468 allowed the investigation of regional differences and patterns. Since the effect of  
469 interest here was the group-by-time interaction effect, the null model only included the  
470 main effects of group and time as fixed effects. The model equation is depicted below;  
471  $\beta_{3\dots 7}$  denotes all two-way interactions and the main effects of all variables in  
472 interaction terms,  $u$  and  $e$  depict random intercepts per subject and subject residuals.

473 The GMV values from the individual clusters were  $\log_e$ -transformed. The  $p$  values from  
474 the full-null-model comparison were corrected using the *Holm-Bonferroni* method in  
475 the *p.adjust* function from the *stats* package.

476 Following a significant group-by-time interaction effect, post-hoc tests were conducted  
477 to test within-group effects using the *emmeans* function with *Holm-Bonferroni*  
478 correction from the *emmeans* package (Lenth, 2021).

479

480 Full model:

$$481 \sqrt{GMV} \sim \beta_0 + \beta_1(Group \times Time \times Cluster) + \beta_2(Group \times Time) + \beta_3(\dots) \beta_7$$
$$482 + \beta_8 \log_e(MFD) + \beta_9(TIV) + u_{subject} + \varepsilon_{subject}$$

483

484 Reduced model:

$$485 \sqrt{GMV} \sim \beta_0 + \beta_1(Group \times Time) + \beta_2(Cluster \times Time)$$
$$486 + \beta_3(Group) + \beta_4(Time) + \beta_5(Cluster) + \beta_6 \log_e(MFD)$$
$$487 + \beta_7(TIV) + u_{subject} + \varepsilon_{subject}$$

488

489 Null model:

$$490 \sqrt{GMV} \sim \beta_0 + \beta_1(Group) + \beta_2(Time) + \beta_3(Cluster) + \beta_6 \log_e(MFD)$$
$$491 + \beta_7(TIV) + u_{subject} + \varepsilon_{subject}$$

492

493 *Total GM, total WM, and CSF:*

494 Only data of participants included in the VBM analysis were used.

495 Log-transformation was applied to values of total GM and total WM, while total CSF  
496 was left untransformed. The full models included the main effects and the group-by-  
497 time interaction (plus covariates  $\log_e(MFD)$  and TIV), while the null models lacked the  
498 interaction. Significant interaction effects were followed by post-hoc tests using the  
499 *emmeans* function.

500

501 *Quantitative T1 values:* Only data of participants included in the VBM analysis were  
502 used.

503 Before analysis, T1 values were z-transformed and outliers of 3 SD below the sample  
504 mean were removed. Because 11 of the resulting 13 outliers came from the same two  
505 participants, these were excluded from the T1 analysis entirely (remaining sample:  
506  $n=61$ ). For the “global” model, T1 values were left untransformed (criterion: symmetry  
507 of the distribution of residuals; see above). The full model included the main effects,  
508 all two-way interactions, and the three-way interaction of group, time, and cluster (plus  
509 covariates  $\log_e(\text{MFD})$  and TIV), while the null model lacked all interactions. If the three-  
510 way interaction was not significant, it was excluded from the full model (reduced  
511 model). The null model remained unchanged. Significant interaction effects were  
512 followed by post-hoc tests using the *emmeans* function.

513

514 *T1-weighted intensity values:* Only data of participants included in the VBM analysis  
515 were used.

516 Before analysis, T1-weighted intensity values of 3 SD above the sample mean were  
517 excluded as outliers. Since the resulting 6 outliers came from the same participant, he  
518 was excluded from the analysis (analysed sample:  $n=62$ ). The full model included the  
519 main effects, all two-way interactions, and the three-way interaction of group, time,  
520 and cluster (plus covariates  $\log_e(\text{MFD})$  and TIV), while the null model lacked all  
521 interactions. In the “global” model, T1-weighted intensity values followed a  
522 symmetrical distribution and were left untransformed.

523

524 *Anatomical ROIs:* We investigated group differences in GMV over time within the  
525 hypothesized four ROIs in four separate models (left and right amygdala, left and right  
526 hippocampus). As the effect-of-interest was the group-by-time interaction, the null  
527 model only included main effects of group and time. GMV values were  $\log_e$ -  
528 transformed.

529 CBF changes in the VBM clusters and in the whole brain

530 Following quality assessment, three participants were excluded from the pASL  
531 analysis. To investigate the impact of group and time on CBF within the VBM clusters,

532 LMMs were set up in analogy to the VBM-ROI analysis. In addition to the factors group,  
533 time, cluster, and their interaction, a random effect per participant was included. The  
534 covariates TIV and MFD (included in the VBM-LMMs) were not included in the pASL  
535 analysis, because the preprocessing of the pASL data already included motion  
536 correction and TIV does not affect the intervention-induced change in CBF within a  
537 predefined region. (For a control analysis showing no significant effect of TIV, MFD or  
538 age on CBF data across all voxels from VBM clusters, see supplement).

539 As an exploratory analysis, group-specific CBF changes over time were assessed  
540 similarly to the VBM analysis, that is, groups were compared with a two-sample t-test  
541 on the difference images (post-pre) in SPM12. No nuisance variables were included,  
542 the sample-specific GM mask was used, and the threshold for TFCE correction was  
543  $p_{FWE} < 0.05$ .

#### 544 Analysis of endocrine, autonomic, and subjective stress measures

545 We investigated changes in autonomic (HR, HRV), endocrine (saliva cortisol, plasma  
546 ACTH), and subjective stress measures (STAI - state anxiety, VAS “stressfulness”)  
547 over time between groups using LMMs. All time points beginning from directly after  
548 the first (T3) until directly after the second (T11) anatomical MR scan were included  
549 (10 time points). One “non-responder” participant was excluded from the endocrine  
550 analysis due to a cortisol increase below 1.5 nmol/l (Miller et al., 2013), another was  
551 identified as an influential outlier by visual inspection of the residuals plot and excluded  
552 from the saliva cortisol model. The full model included group and time as well as their  
553 interaction and baseline (mean between 2 time points before intervention) values as  
554 fixed effects and a random intercept per subject. Full models were compared against  
555 the respective null model lacking the interaction effect with  $X^2$  tests. Saliva cortisol,  
556 plasma ACTH, HR, and STAI score values were  $\log_e$ -transformed, HRV and VAS  
557 stressfulness values were square-root transformed. (More details on LMM analysis  
558 can be found in the section *Analysis of extracted imaging markers* above.)

#### 559 Association of VBM changes with other stress measures

560 We conducted two types of analyses to investigate the association of GMV changes  
561 with endocrine, autonomic, and subjective stress measures: LMMs were used to  
562 analyse the effect of the trajectory of endocrine, autonomic, and subjective stress

563 measures on GMV changes. Linear models (LMs) were used to test the association  
564 between stress reactivity and GMV changes by analyzing the association of  $\Delta$ GMV  
565 values (post-pre) and the peak reactivity value of the stress measures (maximum-  
566 baseline). Peak reactivity is commonly used in stress research (Engert et al., 2013;  
567 Van Cauter & Refetoff, 1985), also to determine individuals with a cortisol increase  
568 below physiological relevance (“non-responders”; Engert et al., 2013; Miller et al.,  
569 2013; Van Cauter & Refetoff, 1985).

570 LMMs have the advantage of covering the trajectory of stress measures by including  
571 data from all timepoints (before, during, and after the intervention). However, this high  
572 number of observations in stress measures also adds a lot of variance compared to  
573 GMV data, available at only two time points, which may overfit the model. Please note  
574 that both LMMs and LMs (with  $\Delta$  values) are complementary analyses, which - since  
575 they are not built on the same data - cannot be directly compared with regard to  
576 variance explained (e.g., adjusted  $R^2$ ) or model fit (e.g., Akaike Information Criterion  
577 AIC).

578 P values from LMMs and LMs were multiple comparison-corrected using Holm’s  
579 method (Holm, 1979; 6 stress measures, 2 analyses, LMM and LM, each = 12) as  
580 implemented in the *p.adjust* function of the *stats* package. In case of significance, the  
581 *emmeans* function from the *emmeans* package (Lenth, 2021) was used to extract the  
582 within-group estimates and test for a significant interaction effect. The *drop1* function  
583 was used to extract the estimates and *p* values for the single predictors.

584

585 *Association of VBM changes with other stress measures (LMMs):* Stress measures  
586 (saliva cortisol, plasma ACTH, HR, HRV, STAI score, and VAS score) were included  
587 in separate full-model LMMs and tested against a null model without them. The model  
588 equation is depicted below;  $\beta_{3...7}$  denotes all two-way interactions and the main  
589 effects of all variables in the interaction term, *u* and *e* depict random intercepts per  
590 subject and subject residuals.

591

592

593



594 Full model:

$$\begin{aligned} 595 \quad \sqrt{GMV} &\sim \beta_0 + \beta_1(Group \times Time \times StressMeasure) + \beta_2(Group \times Time) \\ 596 \quad &+ \beta_3(\dots) \beta_7 + \beta_8 Cluster + \beta_9 \log_e(MFD) + \beta_{10}(TIV) + u_{subject} \\ 597 \quad &+ \varepsilon_{subject} \end{aligned}$$

598 Null model:

$$\begin{aligned} 599 \quad \sqrt{GMV} &\sim \beta_0 + \beta_1(Group \times Time) + \beta_4 Cluster + \beta_5 \log_e(MFD) + \beta_6(TIV) \\ 600 \quad &+ u_{subject} + \varepsilon_{subject} \end{aligned}$$

601

602 *Association of  $\Delta VBM$  with peak reactivity of other stress measures (LMs):*  $\Delta GMV$   
603 values were calculated by subtracting the pre- from the post-scan value.  $\Delta$  values of  
604 stress-measures (saliva cortisol, plasma ACTH, HR, HRV, STAI score, and VAS-  
605 score) were peak reactivity values calculated by subtracting the baseline value from  
606 the maximum value within 15-45 minutes after intervention onset (Engert et al., 2013;  
607 Van Cauter & Refetoff, 1985). The assumptions for LMs were tested as described  
608 above for LMMs.

609  $\Delta GMV$  was the dependent variable in all models. The full model included group and  
610 peak reactivity of stress measures as well as their interaction and the mean of pre-  
611 and post-TIV as well as MFD as independent variables. This was compared against a  
612 null model lacking the peak reactivity of stress measures using an F-test.

613

614 Full model:

$$\begin{aligned} 615 \quad \Delta GMV &\sim \beta_0 + \beta_1(Group \times Peak\ reactivity) + \beta_2(Group) + \\ 616 \quad &\beta_3(Peak\ reactivity) + \beta_4(Cluster) + \beta_5(\underline{MFD}) + \beta_6(\underline{TIV}) \end{aligned}$$

617

618 Null model:

$$619 \quad \Delta GMV \sim \beta_1(Group) + \beta_2(Cluster) + \beta_5(\underline{MFD}) + \beta_6(\underline{TIV})$$

## 620 Results

### 621 Analysis of neuroimaging data

#### 622 Whole-brain VBM

623 After quality assessment, the VBM was analysed in 63 participants: 30 in the stress  
624 group (TSST) and 33 in the control group (placebo-TSST). The results from the two-  
625 sample t-test on  $\Delta$ grey matter images ( $\Delta$ GM) were investigated using two-sided t-  
626 contrasts (i.e., control>stress and control<stress). The T contrast for control>stress  
627 did not yield statistically significant results. The opposite contrast (control<stress]  
628 showed a significant ( $p_{FWE}<0.05$ ) effect in 16 clusters (see Table 1, & Figure 2),  
629 including cortical midline structures (CMS) and bilateral insula. (The cluster with an  
630 extent of 1 voxel was excluded from further analyses).

631 The unthresholded results maps can be found at  
632 <https://www.neurovault.org/collections/SFQXOIUB/>.

#### 633 Post-hoc LMMs in VBM clusters

634 The VBM GM values from the whole-brain analysis result clusters were extracted and  
635 the findings were tested in a post-hoc analysis using LMMs. The “global” model  
636 confirmed the significant group-by-time interaction effect across all clusters  
637 ( $X^2(1)=6.12$ ,  $p=0.0133$ ). The three-way interaction group-by-time-by-cluster was not  
638 significant ( $X^2(46)=41.64$ ,  $p=0.6551$ ), showing no evidence for significantly different  
639 group-by-time effects between clusters. The three-way interaction was thus removed  
640 from the model.

641 Post-hoc tests revealed a non-significant trend for a GMV decrease in the control  
642 group ( $-1.3\%$ ,  $\beta_c = -0.004$ ,  $t/t(2020) = -2.09$ ,  $p=0.0737$ ) and no significant change in the  
643 stress group ( $+0.8\%$ ,  $\beta_s = 0.004$ ,  $t/t(2007) = 1.50$ ,  $p=0.1331$ ).

644 In individual “local” models, the full-null-model comparison showed a significant group-  
645 by-time interaction effect in all 15 clusters tested (see Table 1 for details). Post-hoc  
646 tests revealed three patterns behind the interaction (Figure 2):

- 647 1) eight clusters, including the biggest cluster in the anterior cortical midline (Left  
 648 Superior Medial Frontal Gyrus) and the Left Anterior Insula, showed a  
 649 significant GMV decrease in the control group, and no significant change in the  
 650 stress group;
- 651 2) four clusters, including the Right Angular Gyrus and Left Mid-Cingulate Cortex,  
 652 showed a significant GMV increase in the stress group and no significant  
 653 change in the control group; and
- 654 3) three clusters, including the Right Posterior Insula, showed both a significant  
 655 GMV decrease in the control group and a significant GMV increase in the stress  
 656 group.
- 657

|   | Hemis-<br>phere | Cluster<br>Name                        | Cluster<br>Size | $p_{FWE}$<br>(TFCE) | x y z      | Linear Mixed<br>Model<br>(Holm-<br>Bonferroni-<br>corrected) | Post-Hoc Test<br>(Holm-Bonferroni-<br>corrected)                              | Estimates<br>[Pattern]                             |
|---|-----------------|----------------------------------------|-----------------|---------------------|------------|--------------------------------------------------------------|-------------------------------------------------------------------------------|----------------------------------------------------|
| 1 | L               | Superior<br>Medial<br>Frontal<br>Gyrus | 2364            | 0.014               | -03 50 30  | $X^2(1)= 9.1,$<br>$p=0.0175$                                 | $t/t_c(66.5)= -4.2,$<br>$p= 0.0002$<br>$t/t_s(68.6)= 0.7$<br><br>$p= 0.4915$  | $\beta_c = -0.013^*$<br>$\beta_s = 0.002$<br>[1]   |
| 2 | R               | (posterior)<br>Insula                  | 2441            | 0.015               | 43 -12 04  | $X^2(1)= 14.3,$<br>$p=0.0019$                                | $t/t_c(66.5)= - 3.8,$<br>$p= 0.0007$<br>$t/t_s(68.8)= 2.2,$<br><br>$p= 0.034$ | $\beta_c = -0.011^*$<br>$\beta_s = 0.007^*$<br>[3] |
| 3 | L               | (anterior)<br>Insula                   | 466             | 0.027               | -40 -08 06 | $X^2(1)= 11.3,$<br>$p=0.0062$                                | $t/t_c(66.5)= - 4.3,$<br>$p=0.0001$<br>$t/t_s(68.3)= 1.0$<br><br>$p= 0.3012$  | $\beta_c = -0.014^*$<br>$\beta_s = 0.004$<br>[1]   |
| 4 | R               | Angular<br>Gyrus                       | 696             | 0.035               | 54 -63 28  | $X^2(1)= 15.5,$<br>$p=0.0011$                                | $t/t_c(66.6)= 0.0,$<br>$p= 0.9845$<br>$t/t_s(70.8)= 5.6,$<br><br>$p < 0.0001$ | $\beta_c = 0.0001$<br>$\beta_s = 0.038^*$<br>[2]   |
| 5 | L               | Parahippo<br>campal<br>Gyrus           | 35              | 0.038               | 43 -12 04  | $X^2(1)= 17.4,$<br>$p=0.0005$                                | $t/t_c(66.5)= 4.4,$<br>$p < 0.0001$<br>$t/t_s(68.7)= 0.3,$<br><br>$p=0.734$   | $\beta_c = -0.029^*$<br>$\beta_s = -0.002$<br>[1]  |
| 6 | R               | Inferior<br>Occipital<br>Gyrus         | 118             | 0.042               | 52 -80 03  | $X^2(1)= 12.6,$<br>$p=0.0042$                                | $t/t_c(66.6)= -3.8,$<br>$p= 0.0006$<br>$t/t_s(71.2)= 1.7,$<br><br>$p=0.0919$  | $\beta_c = -0.029^*$<br>$\beta_s = 0.015$<br>[1]   |
| 7 | L               | Mid-<br>Cingulate                      | 160             | 0.042               | -03 -24 46 | $X^2(1)= 8.2,$<br>$p=0.0214$                                 | $t/t_c(66.5)= 0.4,$<br><br>$p= 0.7114$                                        | $\beta_c = 0.0001$<br>$\beta_s = 0.014^*$<br>[2]   |

|    |   |                               |     |       |            |                               |                                                                            |                                                    |
|----|---|-------------------------------|-----|-------|------------|-------------------------------|----------------------------------------------------------------------------|----------------------------------------------------|
|    |   | Cortex                        |     |       |            |                               | $t/t_s(68.5)= 4.4,$<br>$p= 0.0001$                                         |                                                    |
| 8  | R | Cerebro-Motor-Area            | 77  | 0.043 | -04 -06 57 | $X^2(1)= 8.1,$<br>$p=0.0214$  | $t/t_c(66.8)= -1.5,$<br>$p= 0.1307$<br>$t/t_s(67.5)= 2.7,$<br>$p= 0.0193$  | $\beta_c = -0.005$<br>$\beta_s = 0.009^*$<br>[2]   |
| 9  | R | Lateral Orbital Gyrus         | 79  | 0.045 | 36 39 -15  | $X^2(1)= 15.6,$<br>$p=0.0011$ | $t/t_c(66.5)= -3.3,$<br>$p= 0.0031$<br>$t/t_s(69.8)= 2.7,$<br>$p= 0.0091$  | $\beta_c = -0.020^*$<br>$\beta_s = 0.019^*$<br>[3] |
| 10 | R | Precuneus                     | 141 | 0.046 | 03 -50 57  | $X^2(1)= 11.8,$<br>$p=0.0052$ | $t/t_c(66.4)= 0.4,$<br>$p= 0.7201$<br>$t/t_s(67.7)= 5.2,$<br>$p< 0.0001$   | $\beta_c = 0.002$<br>$\beta_s = 0.026^*$<br>[2]    |
| 11 | R | Frontal Pole                  | 52  | 0.046 | 24 63 03   | $X^2(1)= 8.9,$<br>$p=0.0175$  | $t/t_c(66.4)= - 4.8,$<br>$p<0.0001$<br>$t/t_s(68.3)=-0.05,$<br>$p= 0.9626$ | $\beta_c = -0.021^*$<br>$\beta_s = -0.0002$<br>[1] |
| 12 | R | Superior Medial Frontal Gyrus | 44  | 0.047 | 06 52 04   | $X^2(1)= 16.6,$<br>$p=0.0007$ | $t/t_c(67.0)= -7.5,$<br>$p< 0.0001$<br>$t/t_s(67.4)= -0.5,$<br>$p= 0.5824$ | $\beta_c = -0.019^*$<br>$\beta_s = -0.002$<br>[1]  |
| 13 | L | Superior Temporal Gyrus       | 48  | 0.048 | -63 -10 04 | $X^2(1)= 12.4,$<br>$p=0.0042$ | $t/t_c(66.5)= - 2.9,$<br>$p= 0.0088$<br>$t/t_s(68.9)= 2.4,$<br>$p= 0.0193$ | $\beta_c = -0.018^*$<br>$\beta_s = 0.017^*$<br>[3] |
| 14 |   | //                            | 1   | 0.048 | 51 -46 51  | –                             | –                                                                          | –                                                  |
| 15 | R | Middle Frontal Gyrus          | 22  | 0.048 | 45 46 12   | $X^2(1)= 8.1,$<br>$p=0.0215$  | $t/t_c(66.4)= -3.8,$<br>$p= 0.0007$<br>$t/t_s(68.1)= 0.6,$<br>$p= 0.5344$  | $\beta_c = -0.016^*$<br>$\beta_s = 0.003$<br>[1]   |
| 16 | R | Middle Frontal Gyrus          | 23  | 0.050 | 42 54 -02  | $X^2(1)= 7.8,$<br>$p=0.0215$  | $t/t_c(66.7)= -3.7,$<br>$p< 0.0009$<br>$t/t_s(71.5)= 0.7,$<br>$p= 0.5177$  | $\beta_c = -0.027^*$<br>$\beta_s = 0.005$<br>[1]   |

658

659 **Table 1.** Results from VBM analysis and post-hoc linear mixed models (LMMs) on grey matter  
660 volume (GMV) in VBM clusters. Depicted are hemisphere, cluster name (derived from  
661 CAT12's "neuromorphometrics atlas"), cluster size in voxels,  $p_{FWE}$  after threshold-free cluster  
662 enhancement (TFCE) correction, coordinates in MNI space (x y z), LMM results, post-hoc-test  
663 results, group estimates, and pattern (see Figure 2). The cluster with an extent of 1 voxel was  
664 excluded from further analyses. LMM statistical parameters (degrees of freedom (DF),  $X^2$

665 value, p value) were obtained from a full-null model comparison. Post-hoc results include the  
666 t-ratio with DF and p value.  $P < 0.05$  indicates a significant group-by-time interaction effect.  
667  $N = 63$  (stress group = 30).

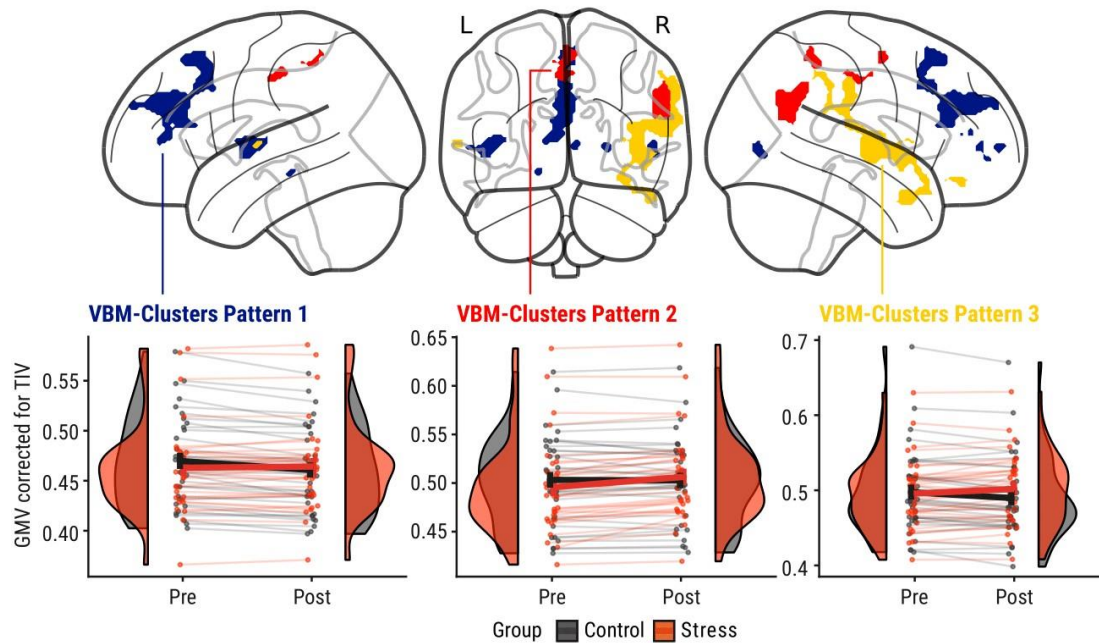

668

669 **Figure 2.** Top row: VBM results indicating a significant ( $p_{FWE} < 0.05$ ) group-by-time interaction  
670 effect on GMV, colours indicate three distinguishable patterns: pattern 1 (blue) - control:  
671 decrease, stress: no significant change; pattern 2 (red) - control: no significant change, stress:  
672 increase; pattern 3 (yellow) - control: decrease, stress: increase. Lower row: Changes in GMV  
673 group distributions (half violin) with individual changes (points, lines) and group means (central  
674 line with error bars).  $N = 63$  (stress group = 30).

## 675 Analysis of total GM, total WM, and CSF

676 A significant group-by-time interaction effect was found for total GM ( $X^2(1) = 6.04$ ,  
677  $p = 0.0140$ ) and CSF ( $X^2(1) = 4.7$ ,  $p = 0.0305$ ), while no significant change was found for  
678 WM ( $X^2(1) = 0.20$ ,  $p = 0.657$ ). Post-hoc tests were not significant for total GM (control:  
679  $t/t_c(60.3) = -1.96$ ,  $p = 0.1084$ ; stress:  $t/t_s(62.9) = 1.70$ ,  $p = 0.1084$ ), but qualitatively  
680 showed a decrease in the control group ( $-0.4\%$ ,  $\beta_c = -0.004$ ) and an increase in the  
681 stress group ( $0.4\%$ ,  $\beta_s = 0.004$ ). CSF increased significantly in the control group

682 (1.5%,  $\beta_c = 3.98$ ,  $t/t_c(60.2) = 2.6$ ,  $p=0.0232$ ) and decreased non-significantly in the  
683 stress group (-0.4%,  $\beta_s = -1.23$ ,  $t/t_s(62.3) = -0.7$ ,  $p=0.4857$ ).

684

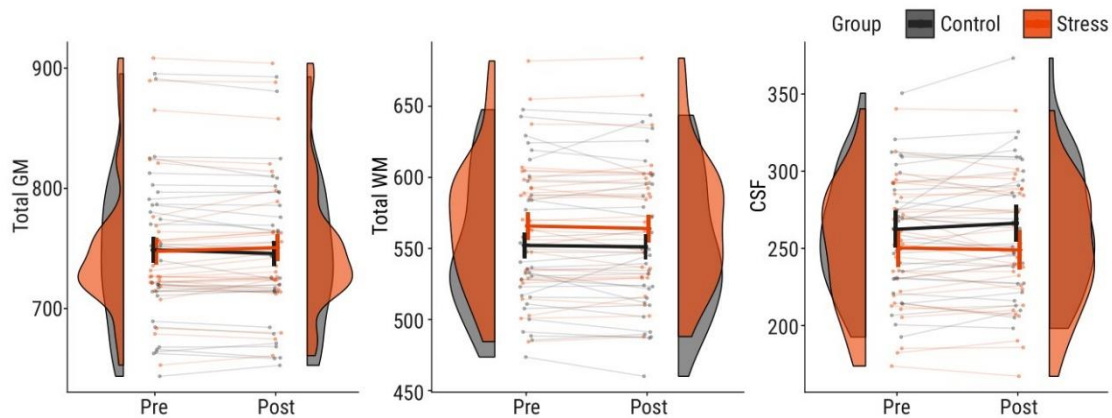

685

686 **Figure 3.** Change in total grey matter (GM), total white matter (WM), and total cerebrospinal  
687 fluid (CSF) values in the control group (grey) and in the stress group (red). Shown are scans  
688 (points) per subject (thin lines) and group distributions (half violin) for pre- and post-  
689 intervention scans. Bold lines indicate estimated marginal means and 95% confidence  
690 intervals obtained from linear mixed models. If data were transformed ( $\log_e$ ) for statistical  
691 analysis, the estimates were back-transformed for visualization. N=63 (stress group=30).

## 692 Additional MR parameters in VBM clusters

### 693 T1 values

694 The group-by-time interaction effect found in the VBM data was not significant in the  
695 extracted quantitative T1 values ( $F(1)=0.40$ ,  $p=0.5297$ ). There was a significant time-  
696 by-cluster interaction effect, indicating an increase in T1 values over time ( $F(14)=9.82$ ,  
697  $p<0.0001$ ). Post-hoc tests showed this was the case in 7 out of the 15 clusters not  
698 including the three biggest clusters in the SMFG and bilateral insula (Table S1, Figure  
699 S3). Post-hoc tests and visual inspection of the results (Figure 4) indicated that on  
700 average the T1 value increased (~47 ms, ~ 3.4%) with time across groups.

701 A control analysis (see supplement) showed a T1 increase of similar magnitude  
702 (29ms, 2.4%,  $F(1)=40.36$ ,  $p<0.0001$ ) in GM voxels outside of the VBM-Clusters. To  
703 follow-up on this we compared T1 values within GM masks produced at different



704 thresholds (0.1,0.2,0.3). A significant increase in T1 values was found at thresholds of  
705 0.1 (and 0.2 and 0.3), but not at 0.5 (see Table S2), indicating that this effect was  
706 driven by the outer edges of GM. We investigated whether the definition of GM  
707 boundaries would similarly affect our VBM and found the VBM-results to be robust  
708 against those changes.

#### 709 T1-weighted intensity values

710 The group-by-time interaction effect found in the VBM data was not significant in the  
711 extracted quantitative T1-weighted intensity values ( $X^2(1)=3.13$ ,  $p=0.99$ ). The main  
712 effect of time was not significant either ( $F(1)= 2.17$ ,  $p=0.141$ , Figure 4), but a significant  
713 main effect of group ( $F(1)= 7.3$ ,  $p= 0.0088$ ) indicated a difference in initial T1weighted  
714 intensity values that remained constant over time.

#### 715 Cerebral blood flow

716 For CBF, there was a non-significant trend for a group-by-time interaction across all  
717 included clusters ( $X^2(1)=3.33$ ,  $p=0.068$ ). Post-hoc tests in both groups separately  
718 showed no significant effect in either group. Qualitatively, CBF decreased in the  
719 control group (by 1.1 ml/100mg/min  $\sim 2.6\%$ ,  $t/t_c(951) = -1.82$ ,  $p(\text{cor}) = 0.1383$ ) and  
720 increased in the stress group (by 0.4 ml/100mg/min  $\sim 1\%$ ,  $t/t_s(951)= 0.775$ ,  $p=0.4387$ ),  
721 resembling pattern 3 of the VBM results (Figure 4).

722 In local post-hoc tests, no CBF changes survived multiple-comparison correction (all  
723  $p_{\text{corr}} > 0.29$ ). For more details of the CBF results, see supplement.

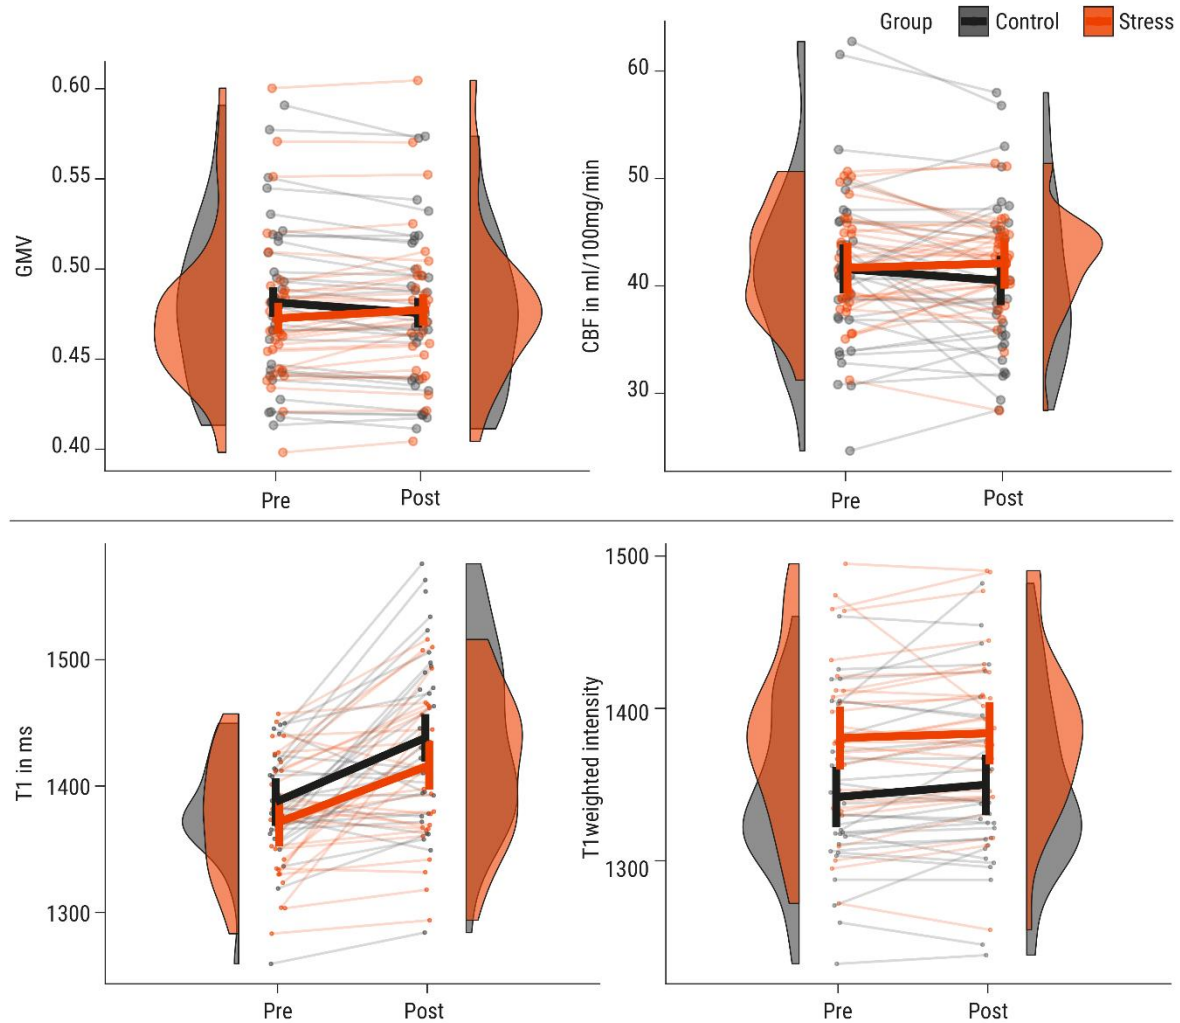

724

725 **Figure 4:** Change in grey matter volume (GMV), cerebral blood flow (CBF), T1, and T1-  
726 weighted intensity values in the control group (grey) and in the stress group (red). Shown are  
727 scans (points) per subject (thin lines) averaged across clusters and group distributions (half  
728 violin) for the pre- and post-intervention scan. Bold lines indicate estimated marginal means  
729 and 95% confidence intervals obtained from linear mixed models. If data were transformed  
730 ( $\log_e$  or square-root) for statistical analysis, the estimates were back-transformed for  
731 visualization.

## 732 Anatomical ROIs: Amygdala and Hippocampus

733 Comparing the full to the null model showed no significant group-by-time interaction  
734 effect on GMV in the left Amygdala ( $X^2(1)=0.60$ ,  $p=0.4372$ ), right Amygdala  
735 ( $X^2(1)=0.77$ ,  $p=0.3803$ ), left Hippocampus ( $X^2(1)=0.13$ ,  $p=0.7227$ ), or right  
736 Hippocampus ( $X^2(1)=0.02$ ,  $p=0.8805$ ).

## 737 Autonomic, endocrine, and subjective stress measures

738 The TSST induced a robust stress response in autonomic, endocrine, and subjective  
739 stress measures, as also shown in previous publications from our study (Reinelt &  
740 Uhlig et al., 2019 and Bae & Reinelt et al., 2019). Significant ( $p_{\text{corr}} < 0.05$  with  
741 Bonferroni-Holm correction) group-by-time interaction effects were present in all  
742 investigated autonomic, endocrine, and subjective markers (Table 2 and Figure 5).

743 Post-hoc tests and visualization (Figure 5) show the dynamics of the stress response:  
744 subjective stress peaked earliest (+5 min) and saliva cortisol latest (+25 min). Heart  
745 rate was the first parameter to return to baseline (+25 min) while the group difference  
746 in saliva cortisol remained longest (+90 min).

747

| Dependent Variable     | N  | DF | X <sup>2</sup> | p       |
|------------------------|----|----|----------------|---------|
| Saliva cortisol        | 64 | 8  | 309.1          | <0.0001 |
| Plasma ACTH            | 57 | 8  | 216.6          | <0.0001 |
| Heart rate             | 60 | 12 | 279.3          | <0.0001 |
| Heart rate variability | 60 | 11 | 44.4           | <0.0001 |
| State anxiety (STAI)   | 66 | 8  | 89.7           | <0.0001 |
| VAS stressfulness      | 66 | 8  | 71.8           | <0.0001 |

748

749 **Table 2.** Results from linear mixed models on autonomic, endocrine, and subjective stress  
750 measures. Statistical parameters were obtained from a full-null-model comparison. Fixed  
751 effects: time, group, group-by-time interaction (full model only); Random effects: participant.  
752 Depicted are degrees of freedom (DF), the X<sup>2</sup> and the p value from the full-null-model  
753 comparison. ACTH = adrenocorticotrophic hormone; STAI = State Anxiety Inventory.

754

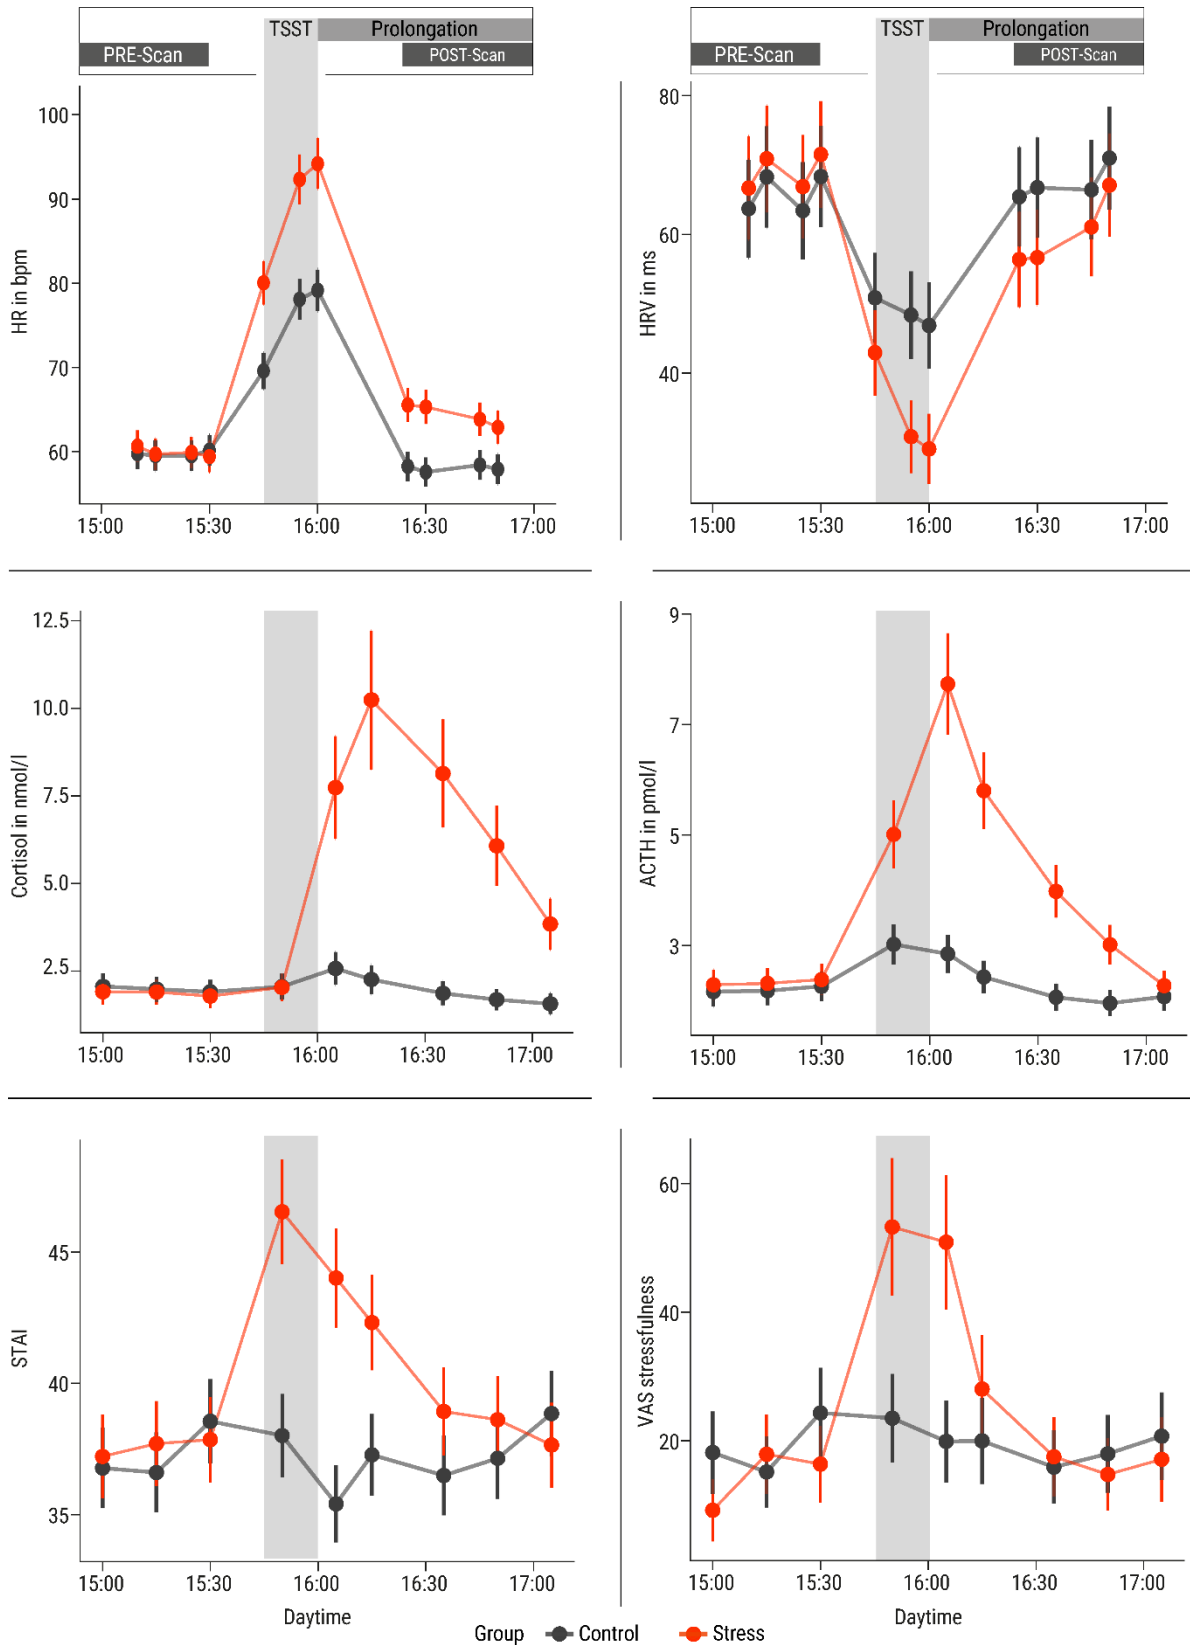

755

756 **Figure 5:** Time courses (x-axis: time of day) of saliva cortisol (nmol/l) and plasma  
 757 adrenocorticotrophic hormone (ACTH) (pmol/l) concentrations, heart rate (beats per minute)  
 758 and heart rate variability (RMSSD in ms) and subjective stress (sum score) measured by state

759 anxiety (State Anxiety Inventory, STAI) and a visual analogue scale (VAS) of stressfulness.  
760 Plotted are the estimated marginal means from the linear mixed models (see above). If data  
761 were transformed ( $\log_e$  or square-root) for statistical analysis, the estimates were back-  
762 transformed for visualization. Error bars depict upper and lower 95% confidence intervals for  
763 model estimates. Grey: control group, orange: stress group. (Only timepoints between the two  
764 anatomical scans are included; for the full time courses and their statistical analysis, see Bae  
765 & Reinelt, et al., 2019; Reinelt & Uhlig, et al., 2019.)

## 766 Association of GMV with other stress measures in VBM clusters

### 767 Association of VBM changes with other stress measures

768 After multiple-comparison correction, no significant association of GMV changes with  
769 autonomic (HR and HRV), endocrine (saliva cortisol and plasma ACTH), and  
770 subjective (STAI score and VAS-score) stress measures was found in any cluster in  
771 the LMM analysis (see Supplement for details).

### 772 Association of $\Delta$ VBM with peak reactivity of other stress measures

773 *Endocrine stress measures:* In the full-null-model comparison, there was no significant  
774 effect of saliva cortisol ( $F(2)=0.63, p_{\text{corr}}=1$ ) or plasma ACTH peak reactivity ( $F(2)=2.03,$   
775  $p_{\text{corr}}=0.1321$ ) on  $\Delta$ GMV (Figure S5).

776 *Autonomic stress measures:* In the full-null-model comparison, there was no  
777 significant effect of HR peak reactivity ( $F(2)=3.51, p_{\text{corr}}=0.2736$ , Figure S5) on  $\Delta$ GMV.  
778 HRV peak reactivity ( $F(2)=6.24, p_{\text{corr}}=0.0224$ ) was significantly associated with  $\Delta$ GMV.  
779 Post-hoc tests showed no significant interaction effect for group ( $t/t(827)= -1.59,$   
780  $p=0.1107$ ), but a negative association between HRV peak reactivity and  $\Delta$ GMV both  
781 in the stress ( $\beta_s= -0.0000327$ ) and the control group ( $\beta_c=-0.0000885$ ).

782 In both groups, the participants who showed more pronounced HRV decreases also  
783 showed stronger GMV increases (or weaker GMV decreases, Figure 6).

784

785 *Subjective stress measures:* In the full-null-model comparison, there was a significant  
786 effect of STAI score peak reactivity on  $\Delta$ GMV ( $F(2)=7.586, p_{\text{corr}}=0.0065$ ). Post-hoc  
787 tests showed a significant interaction effect with group ( $t/t(987)=2.335, p=0.0197$ ) and  
788 a positive association between STAI score peak reactivity and  $\Delta$ GMV both in the stress

789 ( $\beta_s=0.0000902$ ) and the control group ( $\beta_c=0.0003895$ ). In both groups, the participants  
790 who showed more pronounced STAI score increases also showed stronger GMV  
791 increases (or weaker GMV decreases, Figure 6).

792 In the full-null-model comparison, there was no significant effect of VAS stressfulness  
793 peak reactivity of  $\Delta$ GMV ( $F(2)=3.879, p_{\text{corr}}=0.1894$ , Table S6, Figure S5).

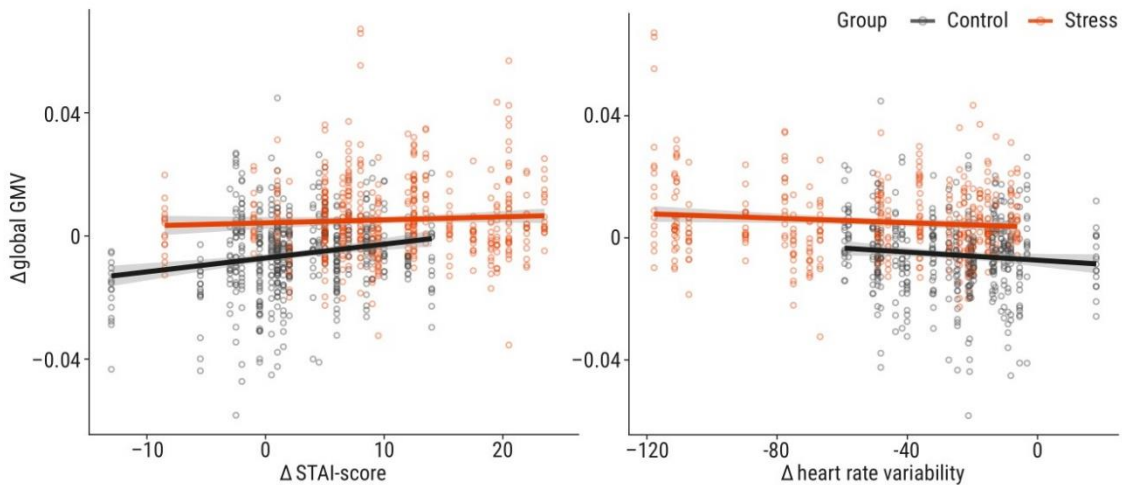

794

795 **Figure 6:** Association of  $\Delta$  grey matter volume (GMV; post-pre) with peak reactivity of stress  
796 measures. Shown are significant associations from linear models (LMs): state anxiety (State  
797 Anxiety Inventory, STAI; positive association) and heart rate variability (RMSSD; negative  
798 association). The LMs revealed no significant association with saliva cortisol, ACTH, heart rate  
799 and subjective stressfulness (Figure S5). Line indicates slope and standard error. Points  
800 indicate GMV values per voxel-based morphometry (VBM) cluster and subject, each subject  
801 is represented in one column of points. Grey: control group, orange: stress group.

## 802 Discussion

803 Using voxel-based morphometry, we found rapid volumetric brain changes that  
804 differed between groups over time in 15 clusters, mainly along the cortical midline and  
805 in bilateral insula. We identified three patterns of GMV changes across the clusters:  
806 the stress group showed a GMV increase (patterns 2 and 3) or no change (pattern 1)  
807 while the control group showed a GMV decrease (patterns 1 and 3) or no change  
808 (pattern 2). Our stress intervention induced a pronounced stress response on the  
809 autonomic, endocrine, and subjective levels. Changes in GMV were related to peak



810 reactivity in subjective stress and heart rate variability but not in heart rate, saliva  
811 cortisol, plasma ACTH, or subjective stressfulness.

812 To explore the microstructural and physiological basis of these findings, we also  
813 analyzed quantitative T1 and CBF imaging parameters. The significant group  
814 difference over time was not present in T1 or T1-weighted intensity values. In T1  
815 values, a significant increase over time across groups occurred, which post-hoc tests  
816 showed to be significant in half of the clusters. In addition, no changes in CBF survived  
817 multiple-comparison correction, while - qualitatively - CBF changed similarly to pattern  
818 1 of GMV changes (decrease in the control group, no change in the stress group).  
819 Thus, the stress-related brain changes are reflected in local GMV increases relative  
820 to the control group. In clusters with no significant GMV change, the increase may be  
821 masked by the GMV decrease observed in the control group. We did not observe the  
822 hypothesized GMV changes in hippocampus and amygdala.

823 In summary, we found that the dynamics of rapid volumetric brain changes differed  
824 between groups, suggesting that endogenous circadian brain changes (GMV  
825 decrease) are counteracted by acute stress.

826

827 In our study, the two anatomical scans were separated by approximately 2.5 hours,  
828 from early to late afternoon. Total GMV has previously been shown to linearly  
829 decrease by ~1% from morning to afternoon (Karch et al., 2019). Circadian changes  
830 in total GMV can be accompanied by regional GMV changes, for example, in the  
831 MPFC and precuneus (Trefler et al., 2016). Thus, the local GMV decrease in the  
832 control group may correspond to endogenous circadian changes, which was absent  
833 in the stress group. Exogenous behavioural interventions have been shown to  
834 attenuate endogenous daytime effects on GMV (Trefler et al., 2016; Thomas et al.,  
835 2016) and so may a stressful intervention like the TSST.

836 In a follow-up analysis, total GM and CSF changed significantly in the control group  
837 (Figure 3): Total GM decreased, while CSF increased from early to late afternoon,  
838 following the pattern of circadian rhythm-related GMV changes reported in Trefler et  
839 al. (2016). In the stress group, total GM and CSF changed significantly in the opposite  
840 direction compared to the control group: GM increased and CSF decreased. Total  
841 white matter did not change significantly in both groups. We thus speculate that

842 processes related to the circadian rhythm (i.e., supporting diurnal brain homeostasis;  
843 Treffler et al. 2016) are involved in the changes in our control group, while in the stress  
844 group, the behavioural intervention counteracts these processes.

845 Furthermore, VBM measures of GM have been shown to be affected by hydration  
846 status, also suggesting an impact of fluid homeostasis (Streitbürger et al., 2012). While  
847 we minimized variability of food and fluid intake by providing a standardized lunch, we  
848 cannot exclude the possibility of hydration differences in our study. On the other hand,  
849 dehydration mainly affects areas close to the ventricles rather than cingulate and  
850 insular cortices (Streitbürger et al., 2012).

851 In summary, GMV decreases in the control group may reflect circadian changes (e.g.,  
852 in fluid homeostasis associated with astrocyte swelling or shrinkage). In the stress  
853 group, such processes may be counteracted by processes regulating energy demand  
854 following neuronal activation in response to the stressful intervention. This increased  
855 energy demand following brain activity under stress may also be reflected in increased  
856 CBF, which has been shown to affect VBM measures of GMV (Ge et al., 2017).

857

858 The rapidness of brain changes we detected with structural MR imaging methods  
859 raises the question of their physiological origins. Mouse studies have connected VBM  
860 changes to altered dendritic spine density: Aversive, stressful stimulation, like auditory  
861 fear conditioning (Keifer et al., 2015) or restraint (Kassem et al., 2013) led to volumetric  
862 changes, measured with volumetric MRI (Kassem et al., 2013) or VBM (Keifer et al.,  
863 2015), which were correlated with spike density changes in functionally relevant  
864 regions, such as amygdala and insula (Keifer et al., 2015) as well as ACC (Kassem et  
865 al., 2013). While synaptic and dendritic plasticity may be detectable after minutes to  
866 hours, given their size is on the scale of nm to  $\mu\text{m}$ , both are unlikely to introduce  
867 changes detectable with a 1.5-mm voxel size (Johansen-Berg et al., 2012). Changes  
868 to dendritic morphology may rather be accompanied by migration or swelling of  
869 capillaries and glia in order to compensate for heightened energy demand resulting in  
870 increased tissue volume, which manifests itself as GMV changes detected by VBM  
871 (Lövdén et al., 2013). Following the supply-demand model, changes in brain function  
872 may thereby precede changes in brain structure (Lövdén et al., 2013).

873 Astrocytes are prominent candidates for targeting cellular structures in brain plasticity.  
874 These non-myelinating glia cells are involved in neuronal metabolism and fluid  
875 homeostasis, and they can mediate the excitability of neurons (Shao & McCarthy,  
876 1994). Activation may cause astrocytes to swell within seconds or minutes, leading to  
877 a general shift from extra- to intracellular space and affecting MRI measures  
878 (Johansen-Berg et al., 2012). Astrocytes also express corticosteroid receptors (Bohn  
879 et al., 1991), and their structure and function can be affected by chronic (Tynan et al.,  
880 2013) as well as acute stress (Braun et al., 2009). Stress-induced astrocyte plasticity  
881 has also been linked to stress-related psychiatric diseases (for a review, see Bender  
882 et al., 2016).

883 Thus, the observed GMV changes may fully or partly reflect (transient) local tissue  
884 (e.g., glial) changes and/or vascular changes to accommodate changes in energy  
885 demand following neural activity. These alterations, which are present more than an  
886 hour after the stress episode, may also be related to the induction of – potentially long-  
887 term - morphological changes.

888

889 Consistent with the overall GMV decrease in the control group, we find decreased CBF  
890 in that group across all clusters (although not statistically significant). In two VBM  
891 clusters, we also found CBF increases in the stress group, which, however, also did  
892 not survive multiple-comparison correction. Qualitatively, CBF was increased in the  
893 left and right SMFG of the stress group, whereas there was no significant effect in the  
894 control group. CBF increases have previously been shown (using ASL) during an in-  
895 scanner stressor, for example in the right PFC, ACC, insula, and putamen (Wang et  
896 al., 2005). Many brain vessels are located along the medial wall, including the middle  
897 cerebral artery, but also the insula displays a particularly high density of vessels,  
898 including the anterior cerebral artery (Mouches & Forkert, 2019). Thus, our main VBM  
899 clusters (bilateral SMFG and insula) are in the vicinity of major vessels. During stress-  
900 induced physiological activity, changes in blood parameters (e.g., blood flow) and  
901 vasodilation could influence the VBM analysis. Changes in CBF have been shown to  
902 closely overlap spatially with changes in VBM (Franklin et al, 2013). However, we did  
903 not find significant CBF changes in the two SMFG clusters. One reason may be the  
904 limited sensitivity of the pASL analysis due to the relatively low resolution, the time  
905 delay to the intervention (~90 min) or limited spatial coverage (Figure S1). On the other

906 hand, previous studies have shown overlapping but incongruent patterns of CBF and  
907 VBM changes (Ge et al., 2017, Franklin et al., 2013), which may indicate that other  
908 processes, such as changes in brain metabolites in response to functional activation,  
909 may affect the T1-weighted signal and thus contribute to apparent GMV changes  
910 measured with VBM (Ge et al., 2017). In line with that, changes in blood oxygenation  
911 after a breathing intervention (with an increased CO<sub>2</sub>-concentration) affected the  
912 estimation of GMV and decreased longitudinal relaxation rate T1 in GM (Tardif et al.,  
913 2017). It has been proposed that an intervention-induced increase in oxygen-demand  
914 in specific brain areas may similarly affect estimations of GMV through changes in  
915 CBF and tissue oxygenation (Tardif et al., 2017). In our study, T1 values showed a  
916 significant increase over time in both groups and seven clusters but no significant  
917 group difference, that is, the VBM interaction was not mirrored in T1 values. This  
918 increase in T1 values was not limited to the VBM clusters but occurred in all GM. With  
919 an increasing threshold of GM definition (probability of this voxel being in GM), the  
920 magnitude of this main effect of time decreased (0.1: 29 ms, 0.2: 24 ms, 0.3: 20 ms)  
921 and was not significant at a threshold of 0.5 (2 ms). This indicates that the T1 increase  
922 was stronger near the tissue boundaries of GM and CSF. Likewise, VBM clusters with  
923 a significant increase in T1 were often located in frontal and parietal areas (Figure S3).  
924 Since T1 is strongly related to water content of tissue (Mathur-De Vré 1984), this could  
925 suggest an inflow of CSF, which was supported by a significant increase in total CSF  
926 volume in the control group, but not in the stress group. The T1-weighted intensity  
927 values did not show any significant changes.

928

929 Functionally, the main clusters of stress related VBM changes in cortical midline  
930 structures (CMS) and bilateral insula can be related to the processing of  
931 emotional/stressful and self-relevant information.

932 The biggest cluster extended from the superior medial frontal cortex to the anterior  
933 cingulate cortex. Functionally, the medial frontal cortex has been involved in emotion  
934 processing (Etkin et al., 2011) and in the regulation of the physiological and  
935 behavioural stress response (McKlveen et al., 2015). It also has a high density of  
936 glucocorticoid receptors, which are central to the negative feedback mechanism of the  
937 HPA axis (Buchanan et al., 2010). Yet, we found no significant association of GMV  
938 with endocrine stress measures.

939 A significant association was found with the subjective and autonomic stress  
940 measures of state anxiety (STAI) and HRV, respectively. Decreased HRV correlated  
941 inversely with GMV changes in both groups, suggesting that control participants  
942 whose parasympathetic activity changed similarly to participants in the stress group  
943 showed less decrease in GMV than other control participants. In parallel, higher state  
944 anxiety was associated with less GMV decrease in both groups, but even stronger in  
945 the control group. These results indicate that parasympathetic deactivation and state  
946 anxiety, which can result from psychological stress, are linearly associated with GMV  
947 changes, and counteract the GMV decrease. In general, CMS – especially anterior  
948 ones – have been associated with self-relatedness and self-relevance (for a review,  
949 see Northoff & Bermpohl, 2004), a feature of any stressor and particularly of the TSST,  
950 in which participants “apply” for their individual dream jobs. Although participants knew  
951 the job interview was not real, they showed pronounced stress responses. Negative  
952 self-relevant stimuli and psychosocial stress have been shown to increase activity in  
953 CMS (e.g., MPFC; Lemogne et al., 2011) as well as connectivity between the  
954 amygdala and CMS (Veer et al., 2011), respectively.

955 In our study, two major clusters of stress related GMV changes showed peaks in the  
956 left anterior insula and the right posterior insula. The insula has been understood as  
957 primary viscerosensory or interoceptive cortex with a posterior-to-anterior gradient  
958 (Craig, 2002): pain, temperature, and other homeostatically relevant bodily stimuli  
959 enter the posterior insula before they are integrated with other (e.g., exteroceptive)  
960 information and evaluated in the anterior insula, influencing subjective experience and  
961 guiding behavior (Craig, 2002). The insula is also highly connected and often co-active  
962 with frontal CMS (e.g., MPFC and ACC), where the strongest cluster of stress-related  
963 GMV changes was found in our study, and they constitute a central axis of the salience  
964 network, which processes homeostatically relevant stimuli (Seeley, 2019). The  
965 integrative, multisensory function of the insula is also supported by animal studies  
966 showing, for example, that the posterior insula can shift behavioural strategies upon  
967 the detection of aversive or stressful interoceptive states (Gehrlach et al., 2019).

968 While we did not investigate functional activation in the current analysis, we have  
969 previously shown increased connectivity to the thalamus in response to stress (Reinelt  
970 & Uhlig et al., 2019) and it is likely that increased brain activity and/or CBF in relevant  
971 areas follow our stress intervention. Indeed, we find a (non-significant) increase from

972 pre- to post- intervention in CBF in the bilateral SMFG of the stress but not the control  
973 group.

974 In contrast to our hypothesis, we did not find significant GMV changes in hippocampus  
975 and amygdala. In animal models of acute stress (Kassem et al., 2013, Chakraborty et  
976 al. 2020) and in stress-related mental disorders in humans (Chen et al., 2006; Karl et  
977 al., 2006) stress-induced brain changes in hippocampus and amygdala are found. At  
978 sub-clinical levels of chronic stress however, some studies did find changes in GMV  
979 (Dedovic et al., 2010; Savic, 2015; Suffren et al., 2021; Spalletta et al., 2014, but others  
980 did not: GMV reductions associated with stressful life events were, for example, found  
981 in the ACC, hippocampus, and parahippocampal gyrus, but not in the amygdala  
982 (Papagni et al., 2011) as well as in the MPFC and right insula, but not in the  
983 hippocampus or amygdala (Ansell et al., 2012). Possibly, GMV alterations in  
984 hippocampus and amygdala may be related to pathophysiological processes in the  
985 context of chronic or severe stress (Ansell et al., 2012) rather than the brain response  
986 to acute stress.

## 987 Limitations

988 There are several limitations to our study. VBM (and MRI in general) can be  
989 considered a physiologically coarse method, and, despite several candidate  
990 processes (discussed above), the physiological origin of GMV (MRI) changes remains  
991 unclear. VBM has also been criticized for introducing bias and neglecting non-linear  
992 effects, which are more pronounced when comparing heterogeneous groups  
993 (Bookstein, 2001; Davatzikos, 2004). By comparing two (randomly assigned) groups  
994 from a homogenous sample in our study, we expected to minimize potential biases.  
995 The inclusion of young, healthy, male participants allowed us to investigate stress-  
996 induced changes using a multimodal approach without confounds like the impact of  
997 the ovarian cycle. However, the generalisability of our results remains to be tested in  
998 studies with more heterogeneous samples. The significant group-by-time interaction  
999 effect on GMV suggests that the differences are intervention-induced. While we kept  
1000 the procedure as similar as possible between groups, we extended the TSST stressor  
1001 by telling participants in the stress but not the control group there would be another  
1002 task. Thus, it is possible that not the TSST alone but the prolongation of the stressor  
1003 (or stress-related vigilance) in the stress group accounts for the group difference in



1004 GMV. Furthermore, a higher temporal resolution would add information about the  
1005 trajectory of changes and about possible immediate transient changes and the stability  
1006 of changes we observed in the stress and in the control group. Head motion is a major  
1007 neuroimaging confound (Beyer et al., 2020.), and it can decrease measures of GMV  
1008 (Reuter et al., 2015). We aimed to physically minimize head motion during data  
1009 acquisition and included the realignment / motion parameter MFD from the preceding  
1010 resting-state scans as a proxy covariate in the VBM analyses. Head motion  
1011 parameters (e.g., using gyrometry or video-based measures) from the actual  
1012 MP2RAGE scan could be acquired using additional hardware.

## 1013 Conclusion

1014 We find rapid differential brain changes following a psychosocial stress intervention  
1015 versus a placebo version of that task. Brain changes are observed in areas associated  
1016 with the processing of emotional and self-relevant information, but also with regulating  
1017 HPA axis activity and sympathetic arousal. Stressed participants additionally show  
1018 (non-significantly) increased cerebral blood flow in prefrontal areas. Neither changes  
1019 in CBF nor in T1 or T1-weighted intensity values account for the observed group  
1020 differences over time. Our findings of rapid GMV changes following acute psychosocial  
1021 stress detected with MRI in humans emphasize the influence of stress on the brain,  
1022 suggesting that diurnal mechanisms of brain homeostasis are perturbed by acute  
1023 stress.

## 1024 Acknowledgements

1025 The visualization functions for LMM diagnostics were kindly provided by Dr. Roger  
1026 Mundry.

## 1027 Conflict of Interest

1028 We have no conflicts of interest to declare.

## 1029 Data availability

1030 The data that support the findings of this study are openly available in  
1031 [https://osf.io/vjyan/?view\\_only=c5873b39b3234453a625575192361057](https://osf.io/vjyan/?view_only=c5873b39b3234453a625575192361057). In  
1032 agreement with participant consent, this includes only derived data, which cannot be  
1033 used to identify individual participants. The code to reproduce the analysis can be  
1034 found on <https://gitlab.gwdg.de/necos/vbm.git>.

## 1035 References

- 1036 Allen, M., Poggiali, D., Whitaker, K., Marshall, T. R., & Kievit, R. A. (2019). Raincloud  
1037 plots: a multi-platform tool for robust data visualization. *Wellcome Open*  
1038 *Research*, 4, 63. <https://doi.org/10.12688/wellcomeopenres.15191.1>
- 1039 Ansell, E. B., Rando, K., Tuit, K., Guarnaccia, J., & Sinha, R. (2012). Cumulative  
1040 Adversity and Smaller Gray Matter Volume in Medial Prefrontal, Anterior  
1041 Cingulate, and Insula Regions. In *Biological Psychiatry*, 72(1), 57–64.  
1042 <https://doi.org/10.1016/j.biopsych.2011.11.022>
- 1043 Ashburner, J., & Friston, K. J. (2000). Voxel-based morphometry--the methods.  
1044 *NeuroImage*, 11(6 Pt 1), 805–821. <https://doi.org/10.1006/nimg.2000.0582>
- 1045 Babayan, A., Erbey, M., Kumral, D., Reinelt, J. D., Reiter, A. M. F., Röbbig, J., Lina  
1046 Schaare, H., Uhlig, M., Anwander, A., Bazin, P.-L., Horstmann, A., Lampe, L.,  
1047 Nikulin, V. V., Okon-Singer, H., Preusser, S., Pampel, A., Rohr, C. S., Sacher,  
1048 J., Thöne-Otto, A., ... Villringer, A. (2019). A mind-brain-body dataset of MRI,  
1049 EEG, cognition, emotion, and peripheral physiology in young and old adults.  
1050 *Scientific Data*, 6(1). <https://doi.org/10.1038/sdata.2018.308>
- 1051 Bae, Y. J., Reinelt, J., Netto, J., Uhlig, M., Willenberg, A., Ceglarek, U., Villringer, A.,  
1052 Thiery, J., Gaebler, M., & Kratzsch, J. (2019). Salivary cortisone, as a biomarker  
1053 for psychosocial stress, is associated with state anxiety and heart rate.  
1054 *Psychoneuroendocrinology*, 101, 35–41.  
1055 <https://doi.org/10.1016/j.psyneuen.2018.10.015>
- 1056 Barth, C., Steele, C. J., Mueller, K., Rekkas, V. P., Arélin, K., Pampel, A., Burmann,  
1057 I., Kratzsch, J., Villringer, A., & Sacher, J. (2016). In-vivo Dynamics of the  
1058 Human Hippocampus across the Menstrual Cycle. *Scientific Reports*, 6, 32833.  
1059 <https://doi.org/10.1038/srep32833>
- 1060 Bates, D., Mächler, M., Bolker, B., & Walker, S. (2015). Fitting Linear Mixed-Effects  
1061 Models Usinglme4. *Journal of Statistical Software*, 67(1).  
1062 <https://doi.org/10.18637/jss.v067.i01>
- 1063 Bender, C. L., Calfa, G. D., & Molina, V. A. (2016). Astrocyte plasticity induced by  
1064 emotional stress: A new partner in psychiatric physiopathology? *Progress in*

- 1065 *Neuro-Psychopharmacology & Biological Psychiatry*, 65, 68–77.  
1066 <https://doi.org/10.1016/j.pnpbp.2015.08.005>
- 1067 Beyer, F., Prehn, K., Wüsten, K. A., Villringer, A., Ordemann, J., Flöel, A., & Witte, A.  
1068 V. (2020). Weight loss reduces head motion: re-visiting a major confound in  
1069 neuroimaging. *Human Brain Mapping*, 41(9), 2490-2494,  
1070 <https://doi.org/10.1101/766261>
- 1071 Bohn, M. C., Howard, E., Vielkind, U., & Krozowski, Z. (1991). Glial cells express  
1072 both mineralocorticoid and glucocorticoid receptors. *The Journal of Steroid*  
1073 *Biochemistry and Molecular Biology*, 40(1-3), 105–111.  
1074 [https://doi.org/10.1016/0960-0760\(91\)90173-3](https://doi.org/10.1016/0960-0760(91)90173-3)
- 1075 Bookstein, F. L. (2001). “Voxel-based morphometry” should not be used with  
1076 imperfectly registered images. *NeuroImage*, 14(6), 1454–1462.  
1077 <https://doi.org/10.1006/nimg.2001.0770>
- 1078 Braun, K., Antemano, R., Helmeke, C., Büchner, M., & Poeggel, G. (2009). Juvenile  
1079 separation stress induces rapid region- and layer-specific changes in S100ss-  
1080 and glial fibrillary acidic protein-immunoreactivity in astrocytes of the rodent  
1081 medial prefrontal cortex. *Neuroscience*, 160(3), 629–638.  
1082 <https://doi.org/10.1016/j.neuroscience.2009.02.074>
- 1083 Buchanan, T. W., Driscoll, D., Mowrer, S. M., Sollers, J. J., 3rd, Thayer, J. F.,  
1084 Kirschbaum, C., & Tranel, D. (2010). Medial prefrontal cortex damage affects  
1085 physiological and psychological stress responses differently in men and women.  
1086 *Psychoneuroendocrinology*, 35(1), 56–66.  
1087 <https://doi.org/10.1016/j.psyneuen.2009.09.006>
- 1088 Chakraborty, P., Datta, S., McEwen, Bruce S., Chattarji, S. (2020) Corticosterone  
1089 after Acute Stress Prevents the Delayed Effects on the Amygdala.  
1090 *Neuropsychopharmacology*, 45(13), 2139–46. [https://doi.org/10.1038/s41386-](https://doi.org/10.1038/s41386-020-0758-0)  
1091 [020-0758-0](https://doi.org/10.1038/s41386-020-0758-0).
- 1092 Chen, S., Xia, W., Li, L., Liu, J., He, Z., Zhang, Z., Yan, L., Zhang, J., & Hu, D.  
1093 (2006). Gray matter density reduction in the insula in fire survivors with  
1094 posttraumatic stress disorder: a voxel-based morphometric study. *Psychiatry*  
1095 *Research*, 146(1), 65–72. <https://doi.org/10.1016/j.psychresns.2005.09.006>

1096

1097

1098 Chen, Y., Rex, C. S., Rice, C. J., Dubé, C. M., Gall, C. M., Lynch, G., & Baram, T.  
1099 Z. (2010). Correlated memory defects and hippocampal dendritic spine loss  
1100 after acute stress involve corticotropin-releasing hormone signaling.  
1101 *Proceedings of the National Academy of Sciences*, 107(29), 13123–13128.  
1102 <https://doi.org/10.1073/pnas.1003825107>

1103 Chrousos, G. P. (2009). Stress and disorders of the stress system. *Nature Reviews*  
1104 *Endocrinology*, 5 (7), 374–381. <https://doi.org/10.1038/nrendo.2009.106>

1105 Cohen, S., Tyrrell, D. A., & Smith, A. P. (1991). Psychological stress and  
1106 susceptibility to the common cold. *The New England Journal of Medicine*,  
1107 325(9), 606–612. <https://doi.org/10.1056/NEJM199108293250903>

1108 Craig, A. D. (2002). How do you feel? Interoception: the sense of the physiological  
1109 condition of the body. *Nature Reviews. Neuroscience*, 3(8), 655–666.  
1110 <https://doi.org/10.1038/nrn894>

1111 Czéh, B., Simon, M., Schmelting, B., Hiemke, C., & Fuchs, E. (2006). Astroglial  
1112 plasticity in the hippocampus is affected by chronic psychosocial stress and  
1113 concomitant fluoxetine treatment. *Neuropsychopharmacology: Official*  
1114 *Publication of the American College of Neuropsychopharmacology*, 31(8),  
1115 1616–1626. <https://doi.org/10.1038/sj.npp.1300982>

1116 Davatzikos, C. (2004). Why voxel-based morphometric analysis should be used with  
1117 great caution when characterizing group differences. *NeuroImage*, 23(1), 17–  
1118 20. <https://doi.org/10.1016/j.neuroimage.2004.05.010>

1119 Dedovic, K., Engert, V., Duchesne, A., Lue, S. D., Andrews, J., Efanov, S. I.,  
1120 Beaudry, T., & Pruessner, J. C. (2010). Cortisol awakening response and  
1121 hippocampal volume: vulnerability for major depressive disorder? *Biological*  
1122 *Psychiatry*, 68(9), 847–853. <https://doi.org/10.1016/j.biopsych.2010.07.025>

1123 Dedovic, K., Rexroth, M., Wolff, E., Duchesne, A., Scherling, C., Beaudry, T., Lue, S.  
1124 D., Lord, C., Engert, V., & Pruessner, J. C. (2009). Neural correlates of  
1125 processing stressful information: an event-related fMRI study. *Brain Research*,  
1126 1293, 49–60. <https://doi.org/10.1016/j.brainres.2009.06.044>

- 1127 Draganski B, Gaser C, Busch V, Schuierer G, Bogdahn U, May A. (2004)  
1128 Neuroplasticity: changes in grey matter induced by training. *Nature*, 427, 311–  
1129 312. <https://doi.org/10.1038/427311a>
- 1130 Eickhoff, S. B., Stephan, K. E., Mohlberg, H., Grefkes, C., Fink, G. R., Amunts, K., &  
1131 Zilles, K. (2005). A new SPM toolbox for combining probabilistic  
1132 cytoarchitectonic maps and functional imaging data. *NeuroImage*, 25(4), 1325–  
1133 1335. <https://doi.org/10.1016/j.neuroimage.2004.12.034>
- 1134 Engert, V., Efanov, S. I., Duchesne, A., Vogel, S., Corbo, V., & Pruessner, J. C.  
1135 (2013). Differentiating anticipatory from reactive cortisol responses to  
1136 psychosocial stress. *Psychoneuroendocrinology*, 38(8), 1328–1337.  
1137 <https://doi.org/10.1016/j.psyneuen.2012.11.018>
- 1138 Etkin, A., Egner, T., & Kalisch, R. (2011). Emotional processing in anterior cingulate  
1139 and medial prefrontal cortex. *Trends in Cognitive Sciences*, 15(2), 85–93.  
1140 <https://doi.org/10.1016/j.tics.2010.11.004>
- 1141 Forstmeier, W., & Schielzeth, H. (2011). Cryptic multiple hypotheses testing in linear  
1142 models: overestimated effect sizes and the winner’s curse. *Behavioral Ecology*  
1143 *and Sociobiology*, 65(1), 47–55. <https://doi.org/10.1007/s00265-010-1038-5>
- 1144 Fox, J., & Weisberg, S. (2018). *An R Companion to Applied Regression*. SAGE  
1145 Publications. <https://play.google.com/store/books/details?id=SfNrDwAAQBAJ>
- 1146 Franklin, T. R., Wang, Z., Shin, J., Jagannathan, K., Suh, J. J., Detre, J. A., O’Brien,  
1147 C. P., & Childress, A. R. (2013). A VBM study demonstrating “apparent” effects  
1148 of a single dose of medication on T1-weighted MRIs. *Brain Structure &*  
1149 *Function*, 218(1), 97–104. <https://doi.org/10.1007/s00429-012-0385-6>
- 1150 Gaudl, A., Kratzsch, J., Bae, Y. J., Kiess, W., Thiery, J., & Ceglarek, U. (2016).  
1151 Liquid chromatography quadrupole linear ion trap mass spectrometry for  
1152 quantitative steroid hormone analysis in plasma, urine, saliva and hair. *Journal*  
1153 *of Chromatography. A*, 1464, 64–71.  
1154 <https://doi.org/10.1016/j.chroma.2016.07.087>
- 1155 Gehrlach, D. A., Dolensek, N., Klein, A. S., Chowdhury, R. R., Matthys, A.,  
1156 Junghänel, M., Gaitanos, T. N., Podgornik, A., Black, T. D., Vaka, N. R.,  
1157 Conzelmann, K.-K., & Gogolla, N. (2019). Aversive state processing in the

- 1158 posterior insular cortex. *Nature Neuroscience*, 22(9), 1424–1437.  
1159 <https://doi.org/10.1038/s41593-019-0469-1>
- 1160 Ge, Q., Peng, W., Zhang, J., Weng, X., Zhang, Y., Liu, T., Zang, Y.-F., & Wang, Z.  
1161 (2017). Short-term apparent brain tissue changes are contributed by cerebral  
1162 blood flow alterations. *PloS One*, 12(8), e0182182.  
1163 <https://doi.org/10.1371/journal.pone.0182182>
- 1164 Gould, E., Tanapat, P., McEwen, B. S., Flügge, G., & Fuchs, E. (1998). Proliferation  
1165 of granule cell precursors in the dentate gyrus of adult monkeys is diminished  
1166 by stress. *Proceedings of the National Academy of Sciences of the United  
1167 States of America*, 95(6), 3168–3171. <https://doi.org/10.1073/pnas.95.6.3168>
- 1168 Haddock B, Larsson HB, Hansen AE, Rostrup E. (2013) Measurement of brain  
1169 oxygenation changes using dynamic T1-weighted imaging. *Neuroimage*, 78:7-  
1170 15. <https://doi.org/10.1016/j.neuroimage.2013.03.068>
- 1171 Heine, V. M., Maslam, S., Zareno, J., Joëls, M., & Lucassen, P. J. (2004).  
1172 Suppressed proliferation and apoptotic changes in the rat dentate gyrus after  
1173 acute and chronic stress are reversible. *The European Journal of Neuroscience*,  
1174 19(1), 131–144. <https://doi.org/10.1046/j.1460-9568.2003.03100.x>
- 1175 Herman, J. P., Figueiredo, H., Mueller, N. K., Ulrich-Lai, Y., Ostrander, M. M., Choi,  
1176 D. C., & Cullinan, W. E. (2003). Central mechanisms of stress integration:  
1177 hierarchical circuitry controlling hypothalamo–pituitary–adrenocortical  
1178 responsiveness. *Frontiers in Neuroendocrinology*, 24(3), 151–180.  
1179 <https://doi.org/10.1016/j.yfrne.2003.07.001>
- 1180 Hermans, E. J., Henckens, M. J. A. G., Joëls, M., & Fernández, G. (2014). Dynamic  
1181 adaptation of large-scale brain networks in response to acute stressors. *Trends  
1182 in Neurosciences*, 37(6), 304–314. <https://doi.org/10.1016/j.tins.2014.03.006>
- 1183 Het, S., Rohleder, N., Schoofs, D., Kirschbaum, C., & Wolf, O. T. (2009).  
1184 Neuroendocrine and psychometric evaluation of a placebo version of the “Trier  
1185 Social Stress Test.” In *Psychoneuroendocrinology*, 34(7), 1075–1086.  
1186 <https://doi.org/10.1016/j.psyneuen.2009.02.008>
- 1187 He, Y., Chen, Z. J., & Evans, A. C. (2007). Small-world anatomical networks in the  
1188 human brain revealed by cortical thickness from MRI. *Cerebral Cortex*, 17(10),



- 1189 2407–2419. <https://doi.org/10.1093/cercor/bhl149>
- 1190 Höflich, A., Ganger, S., Tik, M., Hahn, A., Kranz, G. S., Vanicek, T., Spies, M.,  
1191 Kraus, C., Windischberger, C., Kasper, S., Winkler, D., & Lanzenberger, R.  
1192 (2017). Imaging the neuroplastic effects of ketamine with VBM and the  
1193 necessity of placebo control. In *NeuroImage*, 147, 198–203).  
1194 <https://doi.org/10.1016/j.neuroimage.2016.12.032>
- 1195 Holm, S. (1979). A simple sequentially rejective multiple test procedure.  
1196 *Scandinavian Journal of Statistics*, 6, 65–70.  
1197 <https://www.jstor.org/stable/4615733>.
- 1198 Jenkinson, M., Beckmann, C. F., Behrens, T. E. J., Woolrich, M. W., & Smith, S. M.  
1199 (2012). FSL. *NeuroImage*, 62(2), 782–790.  
1200 <https://doi.org/10.1016/j.neuroimage.2011.09.015>
- 1201 Joëls, M., Pasricha, N., & Karst, H. (2013). The interplay between rapid and slow  
1202 corticosteroid actions in brain. *European Journal of Pharmacology*, 719(1-3),  
1203 44–52. <https://doi.org/10.1016/j.ejphar.2013.07.015>
- 1204 Johansen-Berg, H., Baptista, C. S., & Thomas, A. G. (2012). Human structural  
1205 plasticity at record speed [Review of *Human structural plasticity at record*  
1206 *speed*]. *Neuron*, 73(6), 1058–1060.  
1207 <https://doi.org/10.1016/j.neuron.2012.03.001>
- 1208 Karch, J. D., Filevich, E., Wenger, E., Lisofsky, N., Becker, M., Butler, O.,  
1209 Mårtensson, J., Lindenberger, U., Brandmaier, A. M., & Kühn, S. (2019).  
1210 Identifying predictors of within-person variance in MRI-based brain volume  
1211 estimates. *NeuroImage*, 200, 575–589.  
1212 <https://doi.org/10.1016/j.neuroimage.2019.05.030>
- 1213 Karl, A., Schaefer, M., Malta, L. S., Dörfel, D., Rohleder, N., & Werner, A. (2006). A  
1214 meta-analysis of structural brain abnormalities in PTSD. *Neuroscience and*  
1215 *Biobehavioral Reviews*, 30(7), 1004–1031.  
1216 <https://doi.org/10.1016/j.neubiorev.2006.03.004>
- 1217 Kassem, M. S., Lagopoulos, J., Stait-Gardner, T., Price, W. S., Chohan, T. W.,  
1218 Arnold, J. C., Hatton, S. N., & Bennett, M. R. (2013). Stress-induced grey matter  
1219 loss determined by MRI is primarily due to loss of dendrites and their synapses.

- 1220 *Molecular Neurobiology*, 47(2), 645–661. <https://doi.org/10.1007/s12035-012->  
1221 8365-7
- 1222 Keifer, O. P., Jr, Hurt, R. C., Gutman, D. A., Keilholz, S. D., Gourley, S. L., &  
1223 Ressler, K. J. (2015). Voxel-based morphometry predicts shifts in dendritic  
1224 spine density and morphology with auditory fear conditioning. *Nature*  
1225 *Communications*, 6, 7582. <https://doi.org/10.1038/ncomms8582>
- 1226 Kemeny, M. E. (2003). The Psychobiology of Stress. In *Current Directions in*  
1227 *Psychological Science*, 12 (4), 124–129. <https://doi.org/10.1111/1467->  
1228 8721.01246
- 1229 Kirschbaum, C., Pirke, K. M., & Hellhammer, D. H. (1993). The “Trier Social Stress  
1230 Test”--a tool for investigating psychobiological stress responses in a laboratory  
1231 setting. *Neuropsychobiology*, 28(1-2), 76–81. <https://doi.org/10.1159/000119004>
- 1232 Lanius, R. A., Williamson, P. C., Bluhm, R. L., Densmore, M., Boksman, K., Neufeld,  
1233 R. W. J., Gati, J. S., & Menon, R. S. (2005). Functional connectivity of  
1234 dissociative responses in posttraumatic stress disorder: a functional magnetic  
1235 resonance imaging investigation. *Biological Psychiatry*, 57(8), 873–884.  
1236 <https://doi.org/10.1016/j.biopsych.2005.01.011>
- 1237 Laux, L. (1981). *Das State-Trait-Angstinventar: theoret. Grundlagen u.*  
1238 *Handanweisung*.  
1239 [https://books.google.com/books/about/Das\\_State\\_Trait\\_Angstinventar.html?hl=](https://books.google.com/books/about/Das_State_Trait_Angstinventar.html?hl=&id=-sO6cQAACAAJ)  
1240 [&id=-sO6cQAACAAJ](https://books.google.com/books/about/Das_State_Trait_Angstinventar.html?hl=&id=-sO6cQAACAAJ)
- 1241 Laux, L., & Spielberger, C. D. (2001). *Das State-Trait-Angstinventar: STAI*.  
1242 [https://books.google.com/books/about/Das\\_State\\_Trait\\_Angstinventar.html?hl=](https://books.google.com/books/about/Das_State_Trait_Angstinventar.html?hl=&id=m1VTcgAACAAJ)  
1243 [&id=m1VTcgAACAAJ](https://books.google.com/books/about/Das_State_Trait_Angstinventar.html?hl=&id=m1VTcgAACAAJ)
- 1244 Lemogne, C., Gorwood, P., Bergouignan, L., Pélissolo, A., Lehericy, S., & Fossati, P.  
1245 (2011). Negative affectivity, self-referential processing and the cortical midline  
1246 structures. In *Social Cognitive and Affective Neuroscience*, 6 (4), 426–433.  
1247 <https://doi.org/10.1093/scan/nsq049>
- 1248 Lisofsky, N., Mårtensson, J., Eckert, A., Lindenberger, U., Gallinat, J., & Kühn, S.  
1249 (2015). Hippocampal volume and functional connectivity changes during the  
1250 female menstrual cycle. *NeuroImage*, 118, 154–162.

- 1251 <https://doi.org/10.1016/j.neuroimage.2015.06.012>
- 1252 Lotze, M., Domin, M., Schmidt, C. O., Hosten, N., Grabe, H. J., & Neumann, N.  
1253 (2020). Income is associated with hippocampal/amygdala and education with  
1254 cingulate cortex grey matter volume. *Scientific Reports*, *10*(1), 18786.  
1255 <https://doi.org/10.1038/s41598-020-75809-9>
- 1256 Lövdén, M., Bäckman, L., Lindenberger, U., Schaefer, S., & Schmiedek, F. (2010). A  
1257 theoretical framework for the study of adult cognitive plasticity. *Psychological*  
1258 *Bulletin*, *136* (4), 659–676. <https://doi.org/10.1037/a0020080>
- 1259 Lövdén, M., Wenger, E., Mårtensson, J., Lindenberger, U., & Bäckman, L. (2013).  
1260 Structural brain plasticity in adult learning and development. *Neuroscience and*  
1261 *Biobehavioral Reviews*, *37*(9 Pt B), 2296–2310.  
1262 <https://doi.org/10.1016/j.neubiorev.2013.02.014>
- 1263 Malik, M., Bigger, J. T., Camm, A. J., Kleiger, R. E., Malliani, A., Moss, A. J., &  
1264 Schwartz, P. J. (1996). Heart rate variability: Standards of measurement,  
1265 physiological interpretation, and clinical use. In *European Heart Journal*, *17* (3),  
1266 354–381. <https://doi.org/10.1093/oxfordjournals.eurheartj.a014868>
- 1267 Marques, J. P., Kober, T., Krueger, G., van der Zwaag, W., Van de Moortele, P.-F.,  
1268 & Gruetter, R. (2010). MP2RAGE, a self bias-field corrected sequence for  
1269 improved segmentation and T1-mapping at high field. *NeuroImage*, *49*(2),  
1270 1271–1281. <https://doi.org/10.1016/j.neuroimage.2009.10.002>
- 1271 Mathôt, S., Schreij, D., & Theeuwes, J. (2012). OpenSesame: an open-source,  
1272 graphical experiment builder for the social sciences. *Behavior Research*  
1273 *Methods*, *44*(2), 314–324. <https://doi.org/10.3758/s13428-011-0168-7>
- 1274 Mathur-De Vré, R. (1984). Biomedical implications of the relaxation behaviour of  
1275 water related to NMR imaging. *The British Journal of Radiology*, *57*(683), 955–  
1276 976. <https://doi.org/10.1259/0007-1285-57-683-955>
- 1277 McEwen, B. S. (2005). Glucocorticoids, depression, and mood disorders: structural  
1278 remodeling in the brain. *Metabolism: Clinical and Experimental*, *54*(5 Suppl 1),  
1279 20–23. <https://doi.org/10.1016/j.metabol.2005.01.008>
- 1280 McEwen, B. S., & Gianaros, P. J. (2010). Central role of the brain in stress and  
1281 adaptation: links to socioeconomic status, health, and disease. *Annals of the*

- 1282 *New York Academy of Sciences*, 1186, 190–222. <https://doi.org/10.1111/j.1749->  
1283 6632.2009.05331.x
- 1284 McEwen, B. S., & Gianaros, P. J. (2011). Stress- and allostasis-induced brain  
1285 plasticity. *Annual Review of Medicine*, 62, 431–445.  
1286 <https://doi.org/10.1146/annurev-med-052209-100430>
- 1287 McKlveen, J. M., Myers, B., & Herman, J. P. (2015). The medial prefrontal cortex:  
1288 coordinator of autonomic, neuroendocrine and behavioural responses to stress.  
1289 *Journal of Neuroendocrinology*, 27(6), 446–456.  
1290 <https://doi.org/10.1111/jne.12272>
- 1291 Miller, R., Plessow, F., Kirschbaum, C., & Stalder, T. (2013). Classification criteria for  
1292 distinguishing cortisol responders from nonresponders to psychosocial stress:  
1293 evaluation of salivary cortisol pulse detection in panel designs. *Psychosomatic*  
1294 *Medicine*, 75(9), 832–840. <https://doi.org/10.1097/PSY.0000000000000002>
- 1295 Mouches, P., & Forkert, N. D. (2019). A statistical atlas of cerebral arteries  
1296 generated using multi-center MRA datasets from healthy subjects. *Scientific*  
1297 *Data*, 6(1), 29. <https://doi.org/10.1038/s41597-019-0034-5>
- 1298 Nader, N., Chrousos, G. P., & Kino, T. (2010). Interactions of the circadian CLOCK  
1299 system and the HPA axis. *Trends in Endocrinology and Metabolism: TEM*,  
1300 21(5), 277–286. <https://doi.org/10.1016/j.tem.2009.12.011>
- 1301 Nakamura, K., Brown, R. A., Narayanan, S., Collins, D. L., Arnold, D. L., &  
1302 Alzheimer's Disease Neuroimaging Initiative. (2015). Diurnal fluctuations in  
1303 brain volume: Statistical analyses of MRI from large populations. *NeuroImage*,  
1304 118, 126–132. <https://doi.org/10.1016/j.neuroimage.2015.05.077>
- 1305 Nesse, R. M., Bhatnagar, S., & Ellis, B. (2016). Evolutionary Origins and Functions  
1306 of the Stress Response System. In *Stress: Concepts, Cognition, Emotion, and*  
1307 *Behavior* (pp. 95–101). <https://doi.org/10.1016/b978-0-12-800951-2.00011-x>
- 1308 Nicolaidis, N. C., Charmandari, E., Chrousos, G. P., & Kino, T. (2014). Circadian  
1309 endocrine rhythms: the hypothalamic-pituitary-adrenal axis and its actions.  
1310 *Annals of the New York Academy of Sciences*, 1318, 71–80.  
1311 <https://doi.org/10.1111/nyas.12464>
- 1312 Nierhaus, T., Vidaurre, C., Sannelli, C., Mueller, K.-R., & Villringer, A. (2021).

- 1313 Immediate brain plasticity after one hour of brain-computer interface (BCI). *The*  
1314 *Journal of Physiology*, 599(9), 2435–2451. <https://doi.org/10.1113/JP278118>
- 1315 Northoff, G., & Bermpohl, F. (2004). Cortical midline structures and the self. *Trends*  
1316 *in Cognitive Sciences*, 8(3), 102–107. <https://doi.org/10.1016/j.tics.2004.01.004>
- 1317 Orban, C., Kong, R., Li, J., Chee, M. W. L., & Yeo, B. T. T. (2020). Time of day is  
1318 associated with paradoxical reductions in global signal fluctuation and functional  
1319 connectivity. *PLoS Biology*, 18(2), e3000602.  
1320 <https://doi.org/10.1371/journal.pbio.3000602>
- 1321 Papagni, S. A., Benetti, S., Arulanantham, S., McCrory, E., McGuire, P., & Mechelli,  
1322 A. (2011). Effects of stressful life events on human brain structure: a longitudinal  
1323 voxel-based morphometry study. *Stress*, 14(2), 227–232.  
1324 <https://doi.org/10.3109/10253890.2010.522279>
- 1325 Power, J. D., Schlaggar, B. L., & Petersen, S. E. (2015). Recent progress and  
1326 outstanding issues in motion correction in resting state fMRI. *NeuroImage*, 105,  
1327 536–551. <https://doi.org/10.1016/j.neuroimage.2014.10.044>
- 1328 Pruessner, J. C., Dedovic, K., Khalili-Mahani, N., Engert, V., Pruessner, M., Buss,  
1329 C., Renwick, R., Dagher, A., Meaney, M. J., & Lupien, S. (2008). Deactivation of  
1330 the limbic system during acute psychosocial stress: evidence from positron  
1331 emission tomography and functional magnetic resonance imaging studies.  
1332 *Biological Psychiatry*, 63(2), 234–240.  
1333 <https://doi.org/10.1016/j.biopsych.2007.04.041>
- 1334 Radley, J., Morilak, D., Viau, V., & Campeau, S. (2015). Chronic stress and brain  
1335 plasticity: Mechanisms underlying adaptive and maladaptive changes and  
1336 implications for stress-related CNS disorders. *Neuroscience and Biobehavioral*  
1337 *Reviews*, 58, 79–91. <https://doi.org/10.1016/j.neubiorev.2015.06.018>
- 1338 Reinelt, J., Uhlig, M., Müller, K., Lauckner, M. E., Kumral, D., Schaare, H. L.,  
1339 Baczkowski, B. M., Babayan, A., Erbey, M., Roebbig, J., Reiter, A., Bae, Y.-J.,  
1340 Kratzsch, J., Thiery, J., Hendler, T., Villringer, A., & Gaebler, M. (2019). Acute  
1341 psychosocial stress alters thalamic network centrality. *NeuroImage*, 199, 680–  
1342 690. <https://doi.org/10.1016/j.neuroimage.2019.06.005>
- 1343 Reuter, M., Tisdall, M. D., Qureshi, A., Buckner, R. L., van der Kouwe, A. J. W., &

- 1344 Fischl, B. (2015). Head motion during MRI acquisition reduces gray matter  
1345 volume and thickness estimates. *NeuroImage*, *107*, 107–115.  
1346 <https://doi.org/10.1016/j.neuroimage.2014.12.006>
- 1347 Rogers, M. A., Yamasue, H., Abe, O., Yamada, H., Ohtani, T., Iwanami, A., Aoki, S.,  
1348 Kato, N., & Kasai, K. (2009). Smaller amygdala volume and reduced anterior  
1349 cingulate gray matter density associated with history of post-traumatic stress  
1350 disorder. *Psychiatry Research*, *174*(3), 210–216.  
1351 <https://doi.org/10.1016/j.psychresns.2009.06.001>
- 1352 Sagi, Y., Tavor, I., Hofstetter, S., Tzur-Moryosef, S., Blumenfeld-Katzir, T., & Assaf,  
1353 Y. (2012). Learning in the fast lane: new insights into neuroplasticity. *Neuron*,  
1354 *73*(6), 1195–1203. <https://doi.org/10.1016/j.neuron.2012.01.025>
- 1355 Savic, I. (2015). Structural changes of the brain in relation to occupational stress.  
1356 *Cerebral Cortex*, *25*(6), 1554–1564. <https://doi.org/10.1093/cercor/bht348>
- 1357 Schielzeth, H. (2010). Simple means to improve the interpretability of regression  
1358 coefficients. In *Methods in Ecology and Evolution*, *1* (2), 103–113.  
1359 <https://doi.org/10.1111/j.2041-210x.2010.00012.x>
- 1360 Seeley, W. W. (2019). The Salience Network: A Neural System for Perceiving and  
1361 Responding to Homeostatic Demands. *The Journal of Neuroscience: The*  
1362 *Official Journal of the Society for Neuroscience*, *39*(50), 9878–9882.  
1363 <https://doi.org/10.1523/JNEUROSCI.1138-17.2019>
- 1364 Shao, Y., & McCarthy, K. D. (1994). Plasticity of astrocytes. *Glia*, *11*(2), 147–155.  
1365 <https://doi.org/10.1002/glia.440110209>
- 1366 Spalletta, G., Piras, F., Caltagirone, C., & Fagioli, S. (2014). Hippocampal  
1367 multimodal structural changes and subclinical depression in healthy individuals.  
1368 *Journal of Affective Disorders*, *152-154*, 105–112.  
1369 <https://doi.org/10.1016/j.jad.2013.05.068>
- 1370 Streitbürger, D.-P., Möller, H. E., Tittgemeyer, M., Hund-Georgiadis, M., Schroeter,  
1371 M. L., & Mueller, K. (2012). Investigating structural brain changes of dehydration  
1372 using voxel-based morphometry. *PloS One*, *7*(8), e44195.  
1373 <https://doi.org/10.1371/journal.pone.0044195>
- 1374 Suffren, S., La Buissonnière-Ariza, V., Tucholka, A., Nassim, M., Séguin, J. R.,



- 1375 Boivin, M., Kaur Singh, M., Foland-Ross, L. C., Lepore, F., Gotlib, I. H.,  
1376 Tremblay, R. E., & Maheu, F. S. (2021). Prefrontal cortex and amygdala  
1377 anatomy in youth with persistent levels of harsh parenting practices and  
1378 subclinical anxiety symptoms over time during childhood. *Development and*  
1379 *Psychopathology*, 1–12. <https://doi.org/10.1017/S0954579420001716>
- 1380 Tardif, C. L., Steele, C. J., Lampe, L., Bazin, P.-L., Ragert, P., Villringer, A., &  
1381 Gauthier, C. J. (2017). Investigation of the confounding effects of vasculature  
1382 and metabolism on computational anatomy studies. *NeuroImage*, 149, 233–  
1383 243. <https://doi.org/10.1016/j.neuroimage.2017.01.025>
- 1384 Tasker, J. G., & Herman, J. P. (2011). Mechanisms of rapid glucocorticoid feedback  
1385 inhibition of the hypothalamic-pituitary-adrenal axis. *Stress*, 14(4), 398–406.  
1386 <https://doi.org/10.3109/10253890.2011.586446>
- 1387 Taubert, M., Mehnert, J., Pleger, B., & Villringer, A. (2016). Rapid and specific gray  
1388 matter changes in M1 induced by balance training. *NeuroImage*, 133, 399–407.  
1389 <https://doi.org/10.1016/j.neuroimage.2016.03.017>
- 1390 Thomas, A. G., Dennis, A., Rawlings, N. B., Stagg, C. J., Matthews, L., Morris, M.,  
1391 Kolind, S. H., Foxley, S., Jenkinson, M., Nichols, T. E., Dawes, H., Bandettini, P.  
1392 A., & Johansen-Berg, H. (2016). Multi-modal characterization of rapid anterior  
1393 hippocampal volume increase associated with aerobic exercise. *NeuroImage*,  
1394 131, 162–170. <https://doi.org/10.1016/j.neuroimage.2015.10.090>
- 1395 Thomas, C., Sadeghi, N., Nayak, A., Trefler, A., Sarlls, J., Baker, C. I., & Pierpaoli,  
1396 C. (2018). Impact of time-of-day on diffusivity measures of brain tissue derived  
1397 from diffusion tensor imaging. *NeuroImage*, 173, 25–34.  
1398 <https://doi.org/10.1016/j.neuroimage.2018.02.026>
- 1399 Trefler, A., Sadeghi, N., Thomas, A. G., Pierpaoli, C., Baker, C. I., & Thomas, C.  
1400 (2016). Impact of time-of-day on brain morphometric measures derived from T1-  
1401 weighted magnetic resonance imaging. *NeuroImage*, 133, 41–52.  
1402 <https://doi.org/10.1016/j.neuroimage.2016.02.034>
- 1403 Tsigos, C., & Chrousos, G. P. (2002). Hypothalamic-pituitary-adrenal axis,  
1404 neuroendocrine factors and stress. *Journal of Psychosomatic Research*, 53(4),  
1405 865–871. [https://doi.org/10.1016/s0022-3999\(02\)00429-4](https://doi.org/10.1016/s0022-3999(02)00429-4)

- 1406 Tynan, R. J., Beynon, S. B., Hinwood, M., Johnson, S. J., Nilsson, M., Woods, J. J.,  
1407 & Walker, F. R. (2013). Chronic stress-induced disruption of the astrocyte  
1408 network is driven by structural atrophy and not loss of astrocytes. *Acta*  
1409 *Neuropathologica*, 126(1), 75–91. <https://doi.org/10.1007/s00401-013-1102-0>
- 1410 Van Cauter, E., & Refetoff, S. (1985). Evidence for Two Subtypes of Cushing's  
1411 Disease Based on the Analysis of Episodic Cortisol Secretion. *New England*  
1412 *Journal of Medicine*, 312 (21), 1343–1349.  
1413 <https://doi.org/10.1056/nejm198505233122102>
- 1414 Veer, I. M., Oei, N. Y. L., Spinhoven, P., van Buchem, M. A., Elzinga, B. M., &  
1415 Rombouts, S. A. R. B. (2011). Beyond acute social stress: increased functional  
1416 connectivity between amygdala and cortical midline structures. *NeuroImage*,  
1417 57(4), 1534–1541. <https://doi.org/10.1016/j.neuroimage.2011.05.074>
- 1418 Veer, I. M., Oei, N. Y. L., Spinhoven, P., van Buchem, M. A., Elzinga, B. M., &  
1419 Rombouts, S. A. R. B. (2012). Endogenous cortisol is associated with functional  
1420 connectivity between the amygdala and medial prefrontal cortex.  
1421 *Psychoneuroendocrinology*, 37(7), 1039–1047.  
1422 <https://doi.org/10.1016/j.psyneuen.2011.12.001>
- 1423 Vining, R. F., McGinley, R. A., Maksvytis, J. J., & Ho, K. Y. (1983). Salivary cortisol:  
1424 a better measure of adrenal cortical function than serum cortisol. *Annals of*  
1425 *Clinical Biochemistry*, 20 (Pt 6), 329–335.  
1426 <https://doi.org/10.1177/000456328302000601>
- 1427 Wang, J., Rao, H., Wetmore, G. S., Furlan, P. M., Korczykowski, M., Dinges, D. F., &  
1428 Detre, J. A. (2005). Perfusion functional MRI reveals cerebral blood flow pattern  
1429 under psychological stress. *Proceedings of the National Academy of Sciences*  
1430 *of the United States of America*, 102(49), 17804–17809.  
1431 <https://doi.org/10.1073/pnas.0503082102>
- 1432 Wheelock, M. D., Harnett, N. G., Wood, K. H., Orem, T. R., Granger, D. A., Mrug, S.,  
1433 & Knight, D. C. (2016). Prefrontal Cortex Activity Is Associated with  
1434 Biobehavioral Components of the Stress Response. *Frontiers in Human*  
1435 *Neuroscience*, 10, 583. <https://doi.org/10.3389/fnhum.2016.00583>
- 1436 Wickham, H. (2009). *ggplot2: Elegant Graphics for Data Analysis*. Springer Science  
1437 & Business Media. <https://play.google.com/store/books/details?id=bes->

1438        AAAAQBAJ

1439        Wright, P. J., Mougín, O. E., Totman, J. J., Peters, A. M., Brookes, M. J., Coxon, R.,  
1440        Morris, P. E., Clemence, M., Francis, S. T., Bowtell, R. W., & Gowland, P. A.  
1441        (2008). Water proton T<sub>1</sub> measurements in brain tissue at 7, 3, and 1.5T using  
1442        IR-EPI, IR-TSE, and MPAGE: results and optimization. *Magnetic Resonance*  
1443        *Materials in Physics, Biology and Medicine*, 21 (1-2), 121–130.  
1444        <https://doi.org/10.1007/s10334-008-0104-8>

1445        Zatorre, R. J., Fields, R. D., & Johansen-Berg, H. (2012). Plasticity in gray and white:  
1446        neuroimaging changes in brain structure during learning. *Nature Neuroscience*,  
1447        15(4), 528–536. <https://doi.org/10.1038/nn.3045>
