# 1 Rapid volumetric brain changes after 2 acute psychosocial stress

3  
4 Uhlig, Marie <sup>1,2</sup>; Reinelt, Janis D. <sup>1</sup>; Lauckner, Mark E. <sup>1,3,11</sup>; Kumral, Deniz <sup>1,4</sup>;  
5 Schaare, H. Lina <sup>1,5,6</sup>; Mildner, Toralf <sup>7</sup>; Babayan, Anahit <sup>1,8</sup>; Möller, Harald E. <sup>7</sup>;  
6 Engert, Veronika <sup>9,10</sup>; Villringer, Arno <sup>1,8</sup>; Gaebler, Michael <sup>1,8</sup>

7  
8 <sup>1</sup> Department of Neurology, Max Planck Institute for Human Cognitive and Brain  
9 Sciences, Leipzig, Germany

10 <sup>2</sup> International Max Planck Research School NeuroCom, Leipzig, Germany

11 <sup>3</sup> Independent Research Group “Adaptive Memory”, Max Planck Institute for Human  
12 Cognitive and Brain Sciences, Leipzig, Germany

13 <sup>4</sup> Institute of Psychology, Neuropsychology, University of Freiburg, Freiburg im  
14 Breisgau, Germany

15 <sup>5</sup> Otto Hahn Group “Cognitive Neurogenetics”, Max Planck Institute for Human  
16 Cognitive and Brain Sciences, Leipzig, Germany

17 <sup>6</sup> Institute of Neuroscience and Medicine (INM-7: Brain and Behaviour), Research  
18 Centre Jülich, Germany

19 <sup>7</sup> NMR Methods & Development Group, Max Planck Institute for Human Cognitive  
20 and Brain Sciences, Leipzig, Germany

21 <sup>8</sup> MindBrainBody Institute at the Berlin School of Mind and Brain, Faculty of  
22 Philosophy, Humboldt-Universität zu Berlin, Berlin, German

23 <sup>9</sup> Institute of Psychosocial Medicine, Psychotherapy and Psychooncology, Jena  
24 University Hospital, Friedrich-Schiller University, Jena, Germany

25 <sup>10</sup> Independent Research Group “Social Stress and Family Health”, Max Planck  
26 Institute for Human Cognitive and Brain Sciences, Leipzig, Germany

27 <sup>11</sup> Medical Faculty of Leipzig University, Leipzig, Germany

## 28 Abstract

29 Stress is an important trigger for brain plasticity: Acute stress can rapidly affect brain  
30 activity and functional connectivity, and chronic or pathological stress has been  
31 associated with structural brain changes. Measures of structural magnetic resonance  
32 imaging (MRI) can be modified by short-term motor learning or visual stimulation,  
33 suggesting that they also capture rapid brain changes. Here, we investigated  
34 volumetric brain changes (together with changes in T1 relaxation rate and cerebral  
35 blood flow) after acute stress in humans as well as their relation to  
36 psychophysiological stress measures.

37 Sixty-seven healthy men ( $25.8 \pm 2.7$  years) completed a standardized psychosocial  
38 laboratory stressor (Trier Social Stress Test) or a control version while blood, saliva,  
39 heart rate, and psychometrics were sampled. Structural MRI (T1 mapping /  
40 MP2RAGE sequence) at 3T was acquired 45 min before and 90 min after  
41 intervention onset. Grey matter volume (GMV) changes were analysed using voxel-  
42 based morphometry. Associations with endocrine, autonomic, and subjective stress  
43 measures were tested with linear models.

44 We found significant group-by-time interactions in several brain clusters including  
45 anterior/mid-cingulate cortices and bilateral insula: GMV was increased in the stress  
46 group relative to the control group, in which several clusters showed a GMV  
47 decrease. We found a significant group-by-time interaction for cerebral blood flow,  
48 and a main effect of time for T1 values (longitudinal relaxation time). In addition,  
49 GMV changes were significantly associated with state anxiety and heart rate  
50 variability changes.

51 Such rapid GMV changes assessed with VBM may be induced by local tissue  
52 adaptations to changes in energy demand following neural activity. Our findings  
53 suggest that endogenous brain changes are counteracted by acute psychosocial  
54 stress, which emphasizes the importance of considering homeodynamic processes  
55 and generally highlights the influence of stress on the brain.

56

57

58

59

60

61

## 62 **Highlights**

63

- 64 • We investigated rapid brain changes using MRI in a stress and a control
- 65 group
- 66 • VBM-derived GMV showed a significant group-by-time interaction in several
- 67 clusters
- 68 • Main pattern: GMV in the stress group increased relative to the control group,
- 69 in which GMV decreased
- 70 • GMV changes across groups were associated with state anxiety and heart
- 71 rate variability
- 72 • Neither cerebral blood flow, nor T1 values fully account for the VBM results

73

74

## 75 **Keywords (6)**

76 [Magnetic Resonance Imaging](#), [Brain](#), [Autonomic Nervous System](#), [Stress](#),

77 [Psychological](#), [Neuroplasticity](#)

## 78 **Introduction**

79 A stressor is a real or imagined threat to an organism's integrity or well-being, which

80 elicits a psychological and physiological stress response (Herman et al., 2003).

81 Rapidly activated and rapidly terminated, the stress response is highly adaptive in

82 situations of acute threat, but a chronically activated stress system can have

83 detrimental effects and constitutes a major risk factor for physical and mental

84 disease (McEwen & Gianaros, 2010). While the stress response is orchestrated by

85 the brain, it involves the whole organism, particularly the autonomic nervous system

86 and endocrine systems, with the hypothalamic-pituitary-adrenal axis (HPA axis) as a

87 central component (Kemeny, 2003). In turn, brain structure and function can be  
88 affected by stress, and brain plasticity associated with chronic stress has been  
89 detected with structural magnetic resonance imaging (MRI) (Spalletta et al., 2014). In  
90 the current study, we used structural MRI to investigate rapid brain changes after  
91 acute stress in humans.

92 The stress response comprises a cascade of hormonal signals including  
93 corticotropin-releasing hormone (CRH), vasopressin, adrenocorticotrophic hormone  
94 (ACTH), and cortisol (Tsigos & Chrousos, 2002), which activates bodily functions to  
95 counteract the stressor. Most importantly, it triggers suppression of the immune  
96 system, faster glucose metabolization, and increased blood pressure (Cohen et al.,  
97 1991; Nesse et al., 2016). Being lipophilic, cortisol can cross the blood-brain barrier  
98 and, through its action on brain structures such as the hippocampus, terminate the  
99 stress response (Tasker & Herman, 2011; Joëls et al., 2013). This highlights the  
100 strong association of cortisol with long-term effects of stress on brain plasticity  
101 (McEwen & Gianaros, 2011), which occurs predominantly in regions involved in HPA  
102 axis regulation, such as prefrontal cortex (PFC), hippocampus, and amygdala  
103 (McEwen & Gianaros, 2011).

104 Brain plasticity describes the brain's capacity to alter its structure and function to  
105 adapt to changing demands (Lövdén et al., 2010). Brain structure and function are  
106 thereby inseparable, with structure constraining function and function shaping  
107 structure. In a supply-demand model, regional volume changes represent a  
108 continuous adaptation of the brain in supply (e.g., brain tissue) to changing  
109 environmental demands, mediated by alterations in activity (Lövdén et al., 2013). In  
110 support of this model, MRI studies often report a parallel development of structural  
111 and functional networks (He et al., 2007). Simulations suggest that the structure-  
112 function relationship is determined by biomechanical features, which are affected by  
113 hemodynamic processes following neural activity (Zoraghi et al., 2021). The strength  
114 of structure-function relationships thereby varies regionally: in sensory and unimodal  
115 regions, function may be more strongly constrained by structure than in transmodal  
116 regions like the cingulate cortex or the insulae (Valk et al., 2022), which are  
117 reportedly involved in stress processing, which also exhibit more synaptic plasticity  
118 (Mesulam et al., 1998).

119 Stress-induced functional brain changes have been shown using MRI: During stress,  
120 the BOLD signal increased in prefrontal areas (Dedovic et al., 2009; Wheelock et al.,  
121 2016) and decreased in subcortical regions, including the hippocampus (Dedovic et  
122 al., 2009; Pruessner et al., 2008). Such stress-related brain changes in the PFC and  
123 subcortical regions also outlasted the stress task, which was ascribed to sustained  
124 vigilance or emotional arousal (Wang et al., 2005). Stress-related changes in  
125 functional connectivity have been shown in the salience network (Hermans et al.,  
126 2014), including the anterior cingulate cortex (ACC) and other cortical midline  
127 structures (Veer et al., 2011). These stress-related functional connectivity changes  
128 also correlated with individual cortisol trajectories (Veer et al., 2012). In the  
129 framework by Hermans et al. (2014), humans adapt to acute stress by reallocating  
130 resources to brain networks that implement adaptive mental states: the salience  
131 network (associated with emotional reactivity, fear or vigilance) *during* and the  
132 executive control network (associated with higher-order cognition) *after* an acute  
133 stressor. When the stress wanes, the resource allocation to these two networks  
134 “normalizes” and with it the relative importance of emotional reactivity and higher-  
135 order cognition (Hermans et al., 2014). Analysing the resting-state fMRI from the  
136 experiment presented here, we previously found a stress-related increase in  
137 thalamic functional connectivity (part of the salience network), which was linked to  
138 subjective stressfulness (Reinelt et al., 2019).

139 The link between chronic or pathological stress and structural brain changes in  
140 humans has been well-established (for a review see Radley et al., 2015): For  
141 example, stress-related psychopathologies have been associated with structural  
142 plasticity mainly in limbic and prefrontal areas (McEwen, 2005). Patients with post-  
143 traumatic stress disorder (PTSD) showed decreased grey matter volume (GMV) in  
144 the hippocampus (Chen et al., 2006; Karl et al., 2006), amygdala and ACC (Karl et  
145 al., 2006; Rogers et al., 2009). Also without a clinical diagnosis, higher levels of self-  
146 reported chronic stress have been associated with lower GMV in the hippocampus,  
147 amygdala, insula, and ACC (Ansell et al., 2012b; Lotze et al., 2020; Papagni et al.,  
148 2011).

149 In animal models, rapid stress-induced structural brain changes that have been  
150 detected within hours after acute stress exposure include attenuation of  
151 neurogenesis (marmosets: Gould et al., 1998, rats: Heine et al., 2004), changes in

152 astrocyte density (in degus; Braun et al., 2009) or decreases in dendritic spine  
153 density (in mice; Chen et al., 2010). In the latter study, a mediating function of the  
154 HPA axis in stress-induced memory deficits and associated brain structural changes  
155 was suggested.

156 Here, we used the Trier Social Stress Test (TSST, Kirschbaum et al., 1993), a strong  
157 and naturalistic psychosocial stressor in humans, and MRI to investigate rapid  
158 structural brain plasticity after acute stress.

159 While subtle processes like dendritic remodelling are unlikely to be captured with  
160 MRI at a voxel size of 1.5 mm, experience-induced brain changes have been  
161 detected with structural MRI in humans. Such brain changes are typically  
162 investigated using voxel-based morphometry (VBM; Ashburner & Friston, 2000;  
163 Draganski et al. 2004), which uses computational tissue classification based on T1-  
164 weighted images to detect differences in brain tissue composition. Numerous VBM  
165 studies have found rapid and spatially specific experience-induced brain changes: for  
166 example, increased GMV in the motor cortex was found after one hour of balance  
167 training (Taubert et al., 2016) and after one hour of brain-computer-interface training  
168 in targeted brain regions (Nierhaus et al., 2021). Even after less active interventions,  
169 such as ten minutes of high-frequency visual stimulation (Naegel et al. 2017),  
170 seconds of passive image viewing (Månsson et al. 2020) or twelve minutes of finger  
171 tapping (Olivo et al., 2022), GMV changes were found with VBM. Most evidence for  
172 rapid MRI changes comes from studies that involve the acquisition of novel skills or  
173 exposure to novel stimuli.

174 A stressful experience contains memory and learning aspects, as stress influences  
175 memory formation (Schwabe et al., 2022) and is an important trigger for learning  
176 (e.g., to foresee and adaptively react to future stressors; Peters et al., 2017).  
177 Therefore, similar mechanisms may underlie stress-related brain changes and brain  
178 changes induced by other types of sensorimotor experiences.

179 The physiology behind VBM-derived GMV changes remains unclear<sup>1</sup>. Theoretically,  
180 genesis of neurons, glia cells, and synapses as well as vascular changes could  
181 underlie structural MRI changes in GM (Zatorre et al., 2012). As described above, in

---

<sup>1</sup> While we use the term “grey matter volume” for VBM changes, we consider it a placeholder, as other physiological changes may contribute to the signal (see below).

182 rodents, these plastic processes have been found after stressful interventions (Chen  
183 et al., 2010; Braun et al., 2009). Animal studies that combined MRI and histological  
184 examination after training interventions have suggested neural dendrites and  
185 astrocytes as drivers of rapid, experience-induced brain changes in structural MRI  
186 (Keifer et al., 2015; Sagi et al., 2012). Both can occur after minutes to hours  
187 (Johansen-Berg et al., 2012).

188 Rapid GMV changes may also occur with alterations in the participant's physiological  
189 state during MRI, for example by changes in hydration (Streitbürger et al., 2012) or  
190 osmolality (Höflich et al., 2017; Streitbürger et al., 2012). Furthermore, vascular  
191 changes can impact VBM results, because blood and GM have similar T1 relaxation  
192 values at 3T (Tardif et al., 2017; Wright et al., 2008), and changes in blood  
193 oxygenation and tissue oxygenation (Tardif et al., 2017) or cerebral blood flow (CBF;  
194 Franklin et al., 2013; Ge et al., 2017) may influence changes in VBM-derived GMV.

195 Yet, several studies show rapid structural MR changes independent of vasculature-  
196 related changes (e.g., Zaretskaya et al., 2022, Olivo et al., 2022, Nierhaus et al.,  
197 2021), suggesting additional or alternative mechanisms of VBM changes (Nierhaus  
198 et al., 2021). Moreover, physical activity-induced (without learning or stimulation)  
199 CBF increases are not necessarily accompanied by morphological changes (Olivo).  
200 Taken together, experience-induced brain changes may rely on non-vascular  
201 processes (possibly related to glial processes) and be driven by novelty or learning  
202 aspects of the experience.

203 To specify the stress-related structural plasticity found with VBM and clarify the  
204 contribution of vasculature, we complemented VBM with other MRI measures: CBF  
205 measured with pulsed arterial spin labelling (pASL) and T1 mapping. An increase in  
206 T1 values reflects an increase in water content (Fullerton et al., 1982) and, in the  
207 context of training-induced plasticity, increased T1 values has been discussed to  
208 reflect an increase in vascular tissue (Thomas et al., 2018). On the other hand,  
209 increased oxygenation following a breathing challenge has been shown to decrease  
210 T1 values (Tardif et al., 2017), which has been ascribed to the so-called tissue  
211 oxygenation-level dependent (TOLD) contrast (Haddock et al. 2013). To investigate  
212 differences between T1 maps, T1-weighted images and (preprocessed) VBM  
213 images, we also analysed intensity values from (unpreprocessed) T1-weighted (UNI)  
214 images within the VBM clusters.



215 Not only interventions but also endogenous changes at different time scales can  
216 affect measures of GMV: Ageing is a strong predictor for GMV decreases (Karch et  
217 al., 2019), but rhythmic GMV changes have also been reported over the course of  
218 the menstrual cycle and its hormonal fluctuations (Barth et al., 2016; Lisofsky et al.,  
219 2015) or with the circadian rhythm (Karch et al., 2019; Nakamura et al., 2015; Orban  
220 et al., 2020; Trefler et al., 2016): Total GMV decreased linearly from morning to  
221 afternoon in several studies (Karch et al., 2019; Nakamura et al., 2015; Trefler et al.,  
222 2016), particularly in medial prefrontal areas and the precuneus (Trefler et al., 2016).  
223 In addition, CSF increased over the course of the day (Trefler et al., 2016) whereas  
224 total white matter decreased in one study (Trefler et al., 2016), but was not  
225 associated with time of day in another (Karch et al., 2019). The circadian system and  
226 the stress system both maintain homeostasis by adapting to environmental  
227 conditions, and they strongly interact on the physiological level, with the HPA axis  
228 being a major component of both systems (Nader et al., 2010; Nicolaidis et al.,  
229 2014). Given this relatively new evidence for circadian brain changes, the majority of  
230 experiments on experience-induced plasticity did not control for time of day.

231 To summarize, rapid brain changes have been detected with structural MRI in  
232 humans upon exogenous stimulation and with endogenous fluctuations, and in  
233 animals following stress exposure. We hypothesized that acute stress, as a relevant  
234 exogenous stimulus triggering an endogenous process (i.e., the stress response),  
235 can induce rapid volumetric brain changes in GM derived from MRI. To test this  
236 hypothesis, we had young, healthy men complete either a psychosocial stress test  
237 (Trier Social Stress Test, TSST; Kirschbaum et al., 1993) or a closely related control  
238 intervention without the psychosocially stressful component (placebo-TSST; Het et  
239 al., 2009). Before and after the intervention, we acquired MRI data. Throughout the  
240 entire experiment, we regularly sampled autonomic, endocrine, and subjective  
241 markers of the stress response (Figure 1). This enabled us to measure the stress  
242 response on three levels and assess their relationships with brain changes. We  
243 thereby expected brain changes to be more pronounced in subjects with stronger  
244 increases in autonomic, endocrine, and subjective stress measures.

245 As stress-induced brain changes have often been reported in the amygdala and the  
246 hippocampus (see above), they served as regions-of-interest (ROIs), complemented  
247 by an exploratory whole-brain analysis. To better depict the physiology of stress-



248 induced brain changes, we also compared CBF and T1 values before and after the  
249 intervention. Additionally, we investigated the relation between GMV changes and  
250 the other (i.e., autonomic, endocrine, and subjective) stress measures.

## 251 Methods

### 252 Participants

253 We recruited male participants between 18 and 35 years of age via leaflets, online  
254 advertisements, and the participant database at the Max Planck Institute for Human  
255 Cognitive and Brain Sciences in Leipzig. Exclusion criteria, as assessed in a  
256 telephone screening, were smoking, excessive alcohol / drug consumption, past or  
257 current participation in psychological studies, regular medication intake, history of  
258 cardiovascular or neurological diseases, and a BMI higher than 27. In addition,  
259 standard MRI exclusion criteria applied, such as tattoos, irremovable metal objects  
260 (e.g., retainers, piercings), tinnitus, and claustrophobia.

261 We tested 67 young, healthy males. Because of an incidental medical finding, one  
262 participant was excluded, so that 66 participants (age:  $25.8 \pm 2.7$ , 21-32 years)  
263 entered the analyses, 32 in the stress and 34 in the control group.

264 On separate days prior to the stress/control paradigms as part of a separate study  
265 (Babayan et al., 2019), participants underwent extensive baseline measurements  
266 that included cognitive testing, blood screening, anthropometrics, structural and  
267 resting-state functional MRI scans, resting-state electroencephalography (EEG), self-  
268 report questionnaires, and a structured clinical interview (for details, see Babayan et  
269 al., 2019). If exclusion criteria were detected during the baseline assessment,  
270 participants were excluded from further testing.

271 Included participants were randomly assigned to either the stress or the control  
272 group. To avoid experimenter biases, the administrative staff remained blind to the  
273 testing condition until the first MRI session. All appointments were scheduled for the  
274 same time of day (11:45 am) to control for diurnal fluctuations of hormones (e.g.,  
275 cortisol and ACTH; Nader et al., 2010; Nicolaidis et al., 2014). Participants were  
276 asked to sleep at least 8 hours in the night before the experiment, to get up no later

277 than 9 am, have a normal breakfast and then to not eat or exercise until their study  
278 appointment while also refraining from drinking coffee, black tea, or other stimulant  
279 drinks. Written informed consent was obtained from all participants. The study was  
280 approved by the ethics committee of the medical faculty at Leipzig University  
281 (number 385-1417112014), and participants were financially compensated.

282 Stress and the control groups did not differ significantly in age, hours of sleep on the  
283 day of testing, average sportive activity per week, or self-reported chronic stress  
284 (Reinelt & Uhlig et al., 2019).

## 285 Procedure

286 The pre-scan was completed on average 45 (SD:  $\pm 3.9$ ) min before intervention onset  
287 (before two resting-state fMRI scans, see Figure 1), and the post-scan was  
288 completed on average 88 (SD:  $\pm 3.6$ ) min after intervention onset (between four  
289 resting-state fMRI scans, see Figure 1).

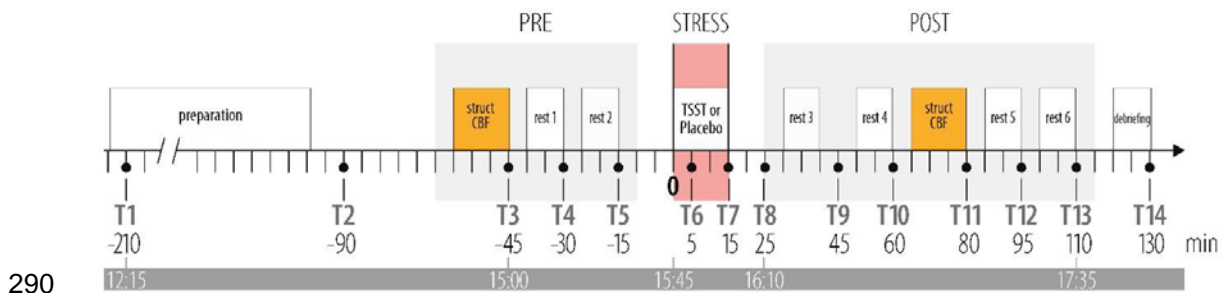

291 **Figure 1.** Schematic overview of the experiment: Between-subject design with the stress  
292 group (n = 32) undergoing the Trier Social Stress Test (TSST) and the control group (n = 34)  
293 a placebo-TSST. Orange boxes indicate two structural scans (struct) using T1 mapping  
294 (MP2RAGE) and two scans of pulsed arterial spin labelling for imaging cerebral blood flow  
295 (CBF). Psychometric ratings, saliva samples, and blood samples were acquired at 14 time  
296 points throughout the experiment (T1-T14). Minutes are relative to the onset of the  
297 intervention (TSST or placebo-TSST), while the bottom bar informs about the time-of-day.  
298 The grey boxes indicate phases in the MRI. (The TSST and the placebo-TSST took place  
299 outside of the MRI.)

## 300 Intervention

301 Each participant completed either a psychosocial stress test (Trier Social Stress  
302 Test, TSST; Kirschbaum et al., 1993) or the placebo-TSST as control intervention,

303 which tightly controls for physical and cognitive load during the TSST (Het et al.,  
304 2009).

305 Participants in the stress group prepared for (5-min) and completed a job interview  
306 (5-min) as well as a difficult mental arithmetic task (5-min) in front of a committee  
307 (one female, one male professional actor), introduced as two professional  
308 psychologists trained in the analysis of nonverbal communication. Additionally, the  
309 task was recorded by a video camera and microphone. In the control condition,  
310 participants prepared (5-min) and spoke about their career aims (5-min) and solved  
311 an easy mental arithmetic task (5-min) with nobody else in the room and no video or  
312 audio recording. To extend the stressfulness of the TSST, participants in the stress  
313 group were told that a second task would follow during the scanning procedure. To  
314 make this scenario more plausible, participants were brought back to the scanning  
315 unit in the company of the experimenter and the TSST committee members. After  
316 rest 4, before the structural scan (+60 min after TSST onset), they were told that no  
317 additional task would follow. For a more detailed description of the interventions, see  
318 supplementary material (section 1.1. and 1.2.) and Reinelt & Uhlig et al. (2019).

319 Throughout the experiment, blood was sampled at 14 time points, and saliva and  
320 subjective ratings at 15 time points. At each sampling point, participants completed  
321 psychometric questionnaires, while autonomic and endocrine data were acquired.  
322 For further details, see below as well as Reinelt & Uhlig et al. (2019) and Bae &  
323 Reinelt et al. (2019).

## 324 Magnetic resonance imaging

### 325 Acquisition

326 MRI was performed on a 3T MAGNETOM Verio (Siemens Healthineers, Erlangen,  
327 Germany) scanner with a 32-channel head-coil. The MP2RAGE sequence was used  
328 to acquire structural MR images. The MP2RAGE sequence yields a nearly bias-free  
329 T1-weighted (UNI) image, which is created by combining the two inversion images  
330 (INV1, INV2) and it produces a T1 map (T1) (Marques et al., 2010). The high-  
331 resolution MP2RAGE sequence had the following parameters (Streitbürger et al.,  
332 2014): T11 = 700 ms, T12 = 2500 ms, TR = 5000 ms, TE = 2.92 ms, FA1 = 4°, FA2 =  
333 5°, 176 slices, voxel dimensions = 1 mm isotropic.

334 Cerebral blood flow (CBF) was measured using the pulsed arterial spin labelling  
335 (pASL) sequence implemented by the vendor (PICORE; Wong et al., 1997; Luh et  
336 al., 1999). For a detailed description of the pASL data acquisition, preprocessing,  
337 analysis and results, see supplement (section 1.4.).

## 338 Preprocessing

339 *VBM*: For each scan (pre-intervention, post-intervention), a brain mask was created  
340 from the INV2-images to remove the noisy background of the UNI images, which is a  
341 by-product of the division of the two inversion images. These background-masked  
342 T1-weighted images were preprocessed using the longitudinal preprocessing  
343 pipeline (with default settings, Version 1450 (CAT12.6) 2019-04-04) of the CAT12  
344 toolbox (<http://www.neuro.uni-jena.de/cat/>) including intra-subject realignment, bias  
345 correction, segmentation into three tissue types (grey matter, white matter, and  
346 cerebrospinal fluid) and non-linear spatial registration to MNI space using DARTEL  
347 (Ashburner, 2007). By default, the images are resampled to a voxel size of 1.5 mm  
348 (isotropic) during preprocessing. We chose a resolution of 1.5 mm because it  
349 matches the resolution of the standard template used for registration and thereby  
350 avoid an additional interpolation step. Finally, the images were smoothed with a  
351 Gaussian kernel at 8-mm full-width at half maximum (FWHM). For further analysis,  
352 the segmented GM images were used.

353 *T1 & T1-weighted*: The background-masked T1-weighted images were warped to  
354 MNI space (using the *normalize:estimate&write* function in SPM). T1 maps were  
355 normalized to MNI space by applying the deformations from the normalization of the  
356 T1-weighted images. The normalized T1-weighted and T1 images were masked with  
357 the same sample-specific GM mask, which was used for the VBM analysis before  
358 smoothing with an 8-mm FWHM Gaussian kernel.

359 *CBF*: PASL time series were first realigned with FSL *McFlirt*, then normalized to MNI  
360 space using SPM12, and finally smoothed with a 3D spatial Gaussian filter (for  
361 details, see supplement, section 1.4.).

## 362 Postprocessing

363 For post-hoc analyses (see below for details), significant ( $p_{\text{FWE}} < 0.05$ ) VBM clusters  
364 were saved as binarized NIfTI images from the result GUI and used as masks for

365 post-hoc tests and to investigate changes in T1 and T1-weighted intensity values as  
366 well as CBF. For binarizing masks, multiplication with masks and extraction of GMV,  
367 T1 and T1-weighted intensity values, FSL was used (*fslmaths* & *fslstats* in *fslutils*,  
368 (Jenkinson et al., 2012)).

369 *VBM post-hoc*: GMV values were extracted by multiplying binary masks of VBM  
370 clusters with the smoothed, preprocessed GM images and extracting the average  
371 value from each cluster.

372 *T1 & T1-weighted*: T1 and T1-weighted images were smoothed after applying a GM  
373 mask (at GM threshold 0.1). Values were extracted by multiplying binary masks of  
374 VBM clusters with the smoothed and normalized T1 and T1-weighted images and  
375 extracting the average value from each cluster. Additionally, average values from  
376 GM voxels outside of the VBM clusters were extracted to serve as a reference for  
377 potential global changes in T1 values or T1-weighted intensity values. Therefore, the  
378 smoothed, GM masked images were multiplied with an inverse binary VBM-cluster  
379 mask.

380 *CBF*: For the CBF analysis, the masks were resampled to a 2-mm isotropic voxel  
381 size to match the pASL images using the *coregister:reslice* function in SPM12. The  
382 preprocessed CBF maps were multiplied with binary masks for VBM clusters and the  
383 average CBF value for each cluster was extracted. As the pASL data is acquired  
384 within a manually defined slab, not all VBM clusters were fully covered (see Figure  
385 S2). Only clusters in which CBF values were available for at least 70% of voxels  
386 were included in the post-hoc CBF analysis.

### 387 Anatomical regions-of-interest definition

388 To test our regional hypotheses, anatomical regions-of-interest (ROIs) were created  
389 as binary masks of hippocampus and amygdala using the Anatomy toolbox (Eickhoff  
390 et al., 2005) and resampled to 1.5-mm space using SPM12 to match the anatomical  
391 images. ROI values were extracted by multiplying masks with the smoothed,  
392 modulated, warped, coregistered images using FSL (*fslmaths* & *fslstats* in *fslutils*,  
393 Jenkinson, et al., 2012). Below, “Hippocampus” and “Amygdala” (with capitalized first  
394 letters) refer to these anatomical ROIs.

## 395 Quality assessment

396 Image quality was assessed using the noise-to-contrast ratio (NCR), a quality  
397 parameter computed by the CAT12 toolbox from noise, bias and white-matter  
398 hyperintensities. Based on within-sample comparisons, data from participants whose  
399 image quality (NCR) was more than 3 standard deviations (SD) below the sample  
400 mean were excluded (see supplement, section 1.3. and Figure S3). Systematic  
401 changes in image quality were tested with a linear mixed model, which showed a  
402 significant group-by-time interaction effect for NCR ( $X^2(1) = 7.9$ ;  $p = 0.0049$ ), driven  
403 by a significant decrease in image quality in the control group (t-ratio = 3.7,  $p =$   
404 0.0005). Head movement can negatively influence image quality in MRI (Power et  
405 al., 2015) as well as estimates of GMV and cortical thickness (Reuter et al., 2015).  
406 As no information about head movement was available from the MP2RAGE data, we  
407 calculated mean framewise displacement (MFD) as the sum of the absolute values  
408 of the six realignment parameters (Power et al., 2015) from the resting-state fMRI  
409 scans that directly preceded the MP2RAGE scan. Accounting for head motion by  
410 including MFD into the above model weakened the group-by-time interaction effect  
411 for NCR ( $X^2(1) = 3.6$ ;  $p = 0.059$ ). Furthermore, a non-significant trend for an effect of  
412 MFD on NCR ( $X^2(1) = 3.4$ ,  $p = 0.068$ ) was found, suggesting an association between  
413 the two quality parameters. To avoid circular analyses (since NCR was derived from  
414 the data), we included MFD in our statistical models to account for quality changes  
415 on volume estimates. MFD thereby served as a proxy covariate for image quality  
416 only. No participants were excluded based on motion parameters, but instead by  
417 using the CAT12 toolbox's quality parameter "noise-to-contrast ratio" for detection.

418 For extracted T1 and T1-weighted intensity values, values outside the range of 3 SD  
419 above and below sample mean were excluded (for details, see respective section  
420 below).

421 The quality assessment of CBF data is described in the supplement (section 1.4.3.).

## 422 Psychophysiological stress measures

### 423 Autonomic

424 Heart rate (HR) and heart rate variability (HRV) were analysed from recordings of  
425 electrocardiography (ECG, outside MRI) and photoplethysmography (PPG, inside  
426 MRI). A detailed description of autonomic data acquisition and data preprocessing  
427 can be found in Reinelt & Uhlig et al. (2019). Autonomic recordings were binned into  
428 three-minute intervals. The average interbeat interval (the inverse HR) was  
429 determined for each interval and HRV was quantified as the square root of the mean  
430 squared differences of successive differences (RMSSD) in interbeat intervals,  
431 indexing parasympathetic cardio-regulation (e.g., Malik et al., 1996).

### 432 Endocrine

433 Blood and saliva samples were acquired throughout the entire experiment (inside as  
434 well as outside the scanner, see Figure 1). Saliva was sampled with a Sarstedt  
435 Salivette (Sarstedt, Nümbrecht, Germany) for at least 2 min per sample. Blood  
436 samples (serum and plasma; Sarstedt Monovette) were acquired by the  
437 experimenter from an intravenous catheter in the left or right cubital vein. Saliva and  
438 blood samples were analysed using Liquid chromatography-tandem mass  
439 spectrometry (LC-MS/MS) at the Institute for Laboratory Medicine, Clinical Chemistry  
440 and Molecular Diagnostics, University of Leipzig, following the protocol described in  
441 (Gaudl et al., 2016). A detailed analysis of changes in endocrine markers and their  
442 timing in the current study can be found in (Bae et al., 2019). For the present  
443 analysis, saliva cortisol and plasma ACTH were used to assess the association of  
444 GMV changes with endocrine stress measures at different times of HPA axis  
445 activation: ACTH, which is secreted earlier during HPA axis activation, peaked at 15  
446 min after stressor onset, while saliva cortisol, a particularly robust stress marker  
447 (Vining et al., 1983), peaked at 25 min after stressor onset (see Bae et al., 2019;  
448 Reinelt & Uhlig et al., 2019). Participants with a cortisol increase below 1.5 nmol/l  
449 following psychosocial stress exposure can be considered non-responders and are  
450 often excluded from analyses including endocrine data (Miller et al., 2013).



## 451 Subjective

452 We presented questionnaires with OpenSesame 3.1.2 (Mathôt et al., 2012) on a  
453 laptop (outside MRI) or on a screen (inside MRI). Participants answered the  
454 questions with two keys on the laptop keyboard (outside MRI) or on an MRI-  
455 compatible button box (inside MRI). We here assessed state anxiety with the state  
456 trait anxiety questionnaire (STAI, sum score of the state subscale; (Laux, 1981; Laux  
457 & Spielberger, 2001) and the perceived stressfulness with the question “How  
458 stressed do you feel right now?”, which was answered using a visual analogue scale  
459 (VAS) with a sliding bar from 0 (“not at all”) to 100 (“very much”).

## 460 Statistical Analysis

### 461 Analysis of neuroimaging data

462 For an illustration of the analysis pipeline see Figure S1 and S3.

### 463 Whole-brain analysis in SPM

464 Following quality assessment, three participants (two in the stress group) were  
465 excluded from the VBM analysis because of an NCR value more than 3 SD below  
466 the sample mean. The final VBM sample therefore consisted of 63 participants, 30 in  
467 the stress group and 33 in the control group. For statistical analysis of MRI data,  
468 delta images were created by subtracting the pre-intervention image from the post-  
469 intervention image. A two-sample t-test was performed on the difference images to  
470 model the group-by-time interaction. To focus the analysis on GM, thresholding is  
471 typically used in VBM analyses (e.g., Streitbürger et al., 2012). Since the voxel  
472 values in delta images describe a difference rather than the tissue probability itself,  
473 they could not be thresholded. Instead, we used a sample-specific GM mask. This  
474 mask is automatically created during model estimation in SPM; in our case a one-  
475 sample t-test on all smoothed, segmented GM images while applying an absolute  
476 masking threshold of 0.1 (probability of this voxel being GM) as recommended in the  
477 CAT12 manual (Version 30-06-2021, [http://www.neuro.uni-jena.de/cat12/CAT12-  
478 Manual.pdf](http://www.neuro.uni-jena.de/cat12/CAT12-Manual.pdf)).

479 The total intracranial volume (TIV) was estimated for both images (pre-intervention,  
480 post-intervention) of each subject using CAT12, and their average was included as a

481 covariate. To account for potential systematic, group-specific changes in image  
482 quality (see the section “Quality assessment” above and supplement, section 1.3.),  
483 MFD was included as a proxy for head motion as an additional covariate. The results  
484 from the two-sample t-test on  $\Delta$ grey matter images ( $\Delta$ GM) were investigated using  
485 two-sided t-contrasts (i.e., control > stress [1 -1 0 0] and control < stress [-1 1 0 0]  
486 with TIV and MFD in columns 3 and 4).

487 To minimize false positive and false negatives results, we used whole-brain  
488 threshold-free cluster enhancement (TFCE), a non-parametric multiple-comparison  
489 correction that does not require a cluster extent threshold, using the TFCE toolbox  
490 (<http://dbm.neuro.uni-jena.de/tfce>) with the default settings of 5000 permutations and  
491 the Smith-permutation method. Anatomical labels for significant clusters were found  
492 using the DARTEL-based “neuromorphometrics atlas” provided with the CAT12  
493 toolbox. Below, we use capitalization to indicate the extracted anatomical labels  
494 (e.g., “Superior Medial Frontal Gyrus”)

#### 495 Analysis of extracted imaging markers

496 Statistical analysis at the ROI level was performed using R 3.0.2 (R Core Team  
497 (2013); <http://www.R-project.org/>). Group differences in variables-of-interest over  
498 time were investigated with linear mixed models (LMMs; using the *lme4* package;  
499 (Bates et al., 2015), which included a random intercept for each subject to account  
500 for inter-individual differences. Visualizations were created in R using *ggplot*  
501 (Wickham, 2009) and by adapting raincloud plots (Allen et al., 2019).

#### 502 Linear mixed model design

503 Across all analyses, the model was built following the same procedure (the full  
504 scripts can be found on <https://gitlab.gwdg.de/necos/vbm.git>):

- 505 1. A null model including a random intercept, covariates of no interest, as well as  
506 reduced fixed effects was set up and compared to a full model, which enables  
507 the targeted testing of effects of interest (Forstmeier & Schielzeth, 2011).
- 508 2. The full model was identical to the null model except for the effect of interest,  
509 in most cases the group-by-time interaction or other (i.e., autonomic,  
510 endocrine, or subjective) stress measures when testing their associations with  
511 GMV.

- 512 3. The difference between the full and the null model was tested using the *anova*  
513 function and setting the argument *test* to “chisq” to do a  $X^2$  (Chi<sup>2</sup>) test.
- 514 4. The *drop1* function was used to extract the results from the individual effects.
- 515 5. Non-significant interactions were dropped from the full model to reduce  
516 complexity (reduced model).
- 517 6. In case of significant interactions, the effects at the individual levels of  
518 predictors (e.g., within-group or for each cluster) were analysed post-hoc  
519 using the *emmeans* & *contrast* function with *Holm* correction from the  
520 *emmeans* package (Lenth, 2021). Estimated marginal means and 95%  
521 confidence intervals obtained with *emmeans* were used for plotting.

522

523 We tested the assumptions for LMMs by visually inspecting the distribution of  
524 residuals in a QQplot and a scatterplot of the residuals plotted against fitted values.  
525 The main criterion for the latter was symmetry along the y-axis. We also visually  
526 inspected residual plots for influential cases. Every case of excluded data is reported  
527 in the methods section and can be reproduced with the analysis scripts at  
528 <https://gitlab.gwdg.de/necos/vbm.git>. Multicollinearity was tested by extracting the  
529 variance inflation factor (VIF), using the *vif* function in the *car* package (Fox &  
530 Weisberg, 2018). To increase the likelihood of symmetrically distributed residuals,  
531 distribution of all variables was estimated visually using histograms, and data were  
532 transformed (default: natural logarithm,  $\log_e$ ) when data distribution appeared  
533 asymmetrical. The covariate MFD was also log-transformed and both covariates of  
534 no interest, TIV and  $\log_e$ (MFD) were z-transformed to increase interpretability of the  
535 results (Schielzeth, 2010).

536

537 *Post-hoc analysis of VBM results:* Post-hoc analysis in significant VBM clusters was  
538 performed to confirm SPM analyses, in which the 2-by-2 design (group-by-time) was  
539 reduced to a two-sample t-test over the difference images (post- minus pre-  
540 intervention). Group-by-time interaction effects were tested in linear mixed models  
541 for each cluster separately, which allowed the investigation of regional differences  
542 and patterns. Since the effect of interest was the group-by-time interaction effect, the  
543 null model only included the main effects of group and time as fixed effects. The

544 model equation is depicted below;  $\beta_1 \dots \beta_5$  denotes the two-way interaction and the  
545 main effects of all variables in interaction terms and the covariates,  $u$  and  $e$  depict  
546 random intercepts per subject and subject residuals. The GMV values from the  
547 individual clusters were  $\log_e$ -transformed. The  $p$  values from the full-null-model  
548 comparison were corrected using the *Holm-Bonferroni* method in the *p.adjust*  
549 function from the *stats* package.

550 Following a significant group-by-time interaction effect, post-hoc tests were  
551 conducted to test within-group effects using the *emmeans* function with *Holm-*  
552 *Bonferroni* correction from the *emmeans* package (Lenth, 2021).

553

554

555

556 Full model:

$$\ln(GMV) \sim \beta_0 + \beta_1(Group \times Time) + \beta_2(Group) + \beta_3(Time) \\ + \beta_4 \log_e(MFD) + \beta_5(TIV) + u_{subject} + \varepsilon_{subject}$$

557

558 Null model:

$$\ln(GMV) \sim \beta_0 + \beta_1(Group) + \beta_2(Time) + \beta_3 \log_e(MFD) + \beta_4(TIV) + u_{subject} \\ + \varepsilon_{subject}$$

559

560

561 *Total GM, total WM, and CSF:*

562 Only data of participants included in the VBM analysis were used.

563  $\log_e$ -transformation was applied to values of total GM and total WM, while total CSF  
564 was left untransformed (criterion: symmetry of the distribution of residuals; see  
565 above). The full models included the main effects and the group-by-time interaction  
566 (plus covariates  $\log_e(MFD)$  and TIV), while the null models lacked the interaction.  
567 Significant interaction effects were followed by post-hoc tests using the *emmeans*  
568 function.

569

570 *Quantitative T1 values:* Only data of participants included in the VBM analysis were  
571 used.

572 Before analysis, T1 values (mean per participants and cluster) were z-transformed  
573 and outliers of 3 SD above and below the sample mean were removed. Because 11  
574 of the resulting 13 outliers came from the same two participants, these were  
575 excluded from the T1 analysis entirely (remaining sample:  $n = 61$ ). T1 values were  
576 left untransformed (criterion: symmetry of the distribution of residuals; see above).  
577 The full model included the main effects, all two-way interactions, and the three-way  
578 interaction of group, time, and cluster (plus covariates  $\log_e(\text{MFD})$  and TIV), while the  
579 null model lacked all interactions. If the three-way interaction was not significant, it  
580 was excluded from the full model (reduced model). The null model remained  
581 unchanged. Significant interaction effects were followed by post-hoc tests using the  
582 *emmeans* function.

583

584 *T1-weighted intensity values:* Only data of participants included in the VBM analysis  
585 were used.

586 Before analysis, T1-weighted intensity values of 3 SD above the sample mean were  
587 excluded as outliers. Since the resulting 6 outliers came from the same participant,  
588 he was excluded from the analysis (analysed sample:  $n = 62$ ). The full model  
589 included the main effects, all two-way interactions, and the three-way interaction of  
590 group, time, and cluster (plus covariates  $\log_e(\text{MFD})$  and TIV), while the null model  
591 lacked all interactions. T1-weighted intensity values followed a symmetrical  
592 distribution and were left untransformed.

593

594 *Anatomical ROIs:* We investigated group differences in GMV over time within the  
595 hypothesized four ROIs in four separate models (left and right amygdala, left and  
596 right hippocampus). As the effect-of-interest was the group-by-time interaction, the  
597 null model only included main effects of group and time. GMV values were  $\log_e$ -  
598 transformed to increase symmetry of variable distribution (see above).

599 CBF changes in the VBM clusters and in the whole brain

600 Following quality assessment, three participants were excluded from the pASL  
601 analysis. To investigate the impact of group and time on CBF within the VBM  
602 clusters, LMMs were set up in analogy to the VBM-ROI analysis. In addition to the  
603 factors group, time, cluster, and their interaction, a random effect per participant was  
604 included. The covariates TIV and MFD (included in the VBM-LMMs) were not  
605 included in the pASL analysis, because the preprocessing of the pASL data already  
606 included motion correction and TIV does not affect the intervention-induced change  
607 in CBF within a predefined region. (For a control analysis showing no significant  
608 effect of TIV, MFD or age on CBF data across all voxels from VBM clusters, see  
609 supplement, section 2.3.). CBF data followed a symmetrical distribution and was  
610 therefore not transformed before analysis.

611 As an exploratory analysis, group-specific CBF changes over time were assessed  
612 similarly to the VBM analysis, that is, groups were compared with a two-sample t-test  
613 on the difference images (post-pre) in SPM12. No nuisance variables were included,  
614 the sample-specific GM mask was used, and the threshold for TFCE correction was  
615  $p_{FWE} < 0.05$ .

616 Analysis of endocrine, autonomic, and subjective stress measures

617 We investigated changes in autonomic (HR, HRV), endocrine (saliva cortisol, plasma  
618 ACTH), and subjective stress measures (STAI - state anxiety, VAS “stressfulness”)  
619 over time between groups using LMMs. All time points beginning from directly after  
620 the first (T3) until directly after the second (T11 and T12) structural MR scan were  
621 included (10 time points for endocrine and subjective data and 12 for autonomic  
622 data). One “non-responder” participant was excluded from the endocrine analysis  
623 due to a cortisol increase below 1.5 nmol/l (Miller et al., 2013), one data point was  
624 identified as a measurement error (value dropped by 98% to near 0 and then  
625 returned to 81%) by visual inspection of the residuals plot and excluded from the  
626 saliva cortisol model. The full model included group and time as well as their  
627 interaction and baseline (mean between 2 time points before intervention: T4 and T5  
628 (-30min and -15min), see Figure 1) values as fixed effects and a random intercept  
629 per subject. Full models were compared against the respective null model lacking  
630 the interaction effect with  $X^2$  tests. Saliva cortisol, plasma ACTH, HR, and STAI

631 score values were  $\log_e$ -transformed, HRV and VAS stressfulness values were  
632 square-root transformed. (More details on LMM analysis can be found in the section  
633 *Analysis of extracted imaging markers* above.)

#### 634 Association of VBM changes with other stress measures

635 We conducted two types of analyses to investigate the association of GMV changes  
636 with endocrine, autonomic, and subjective stress measures: LMMs were used to  
637 analyse the effect of the trajectory of endocrine, autonomic, and subjective stress  
638 measures on GMV changes. Linear models (LMs) were used to test the association  
639 between stress reactivity and GMV changes by analysing the association of  $\Delta$ GMV  
640 values (post-pre) and the peak reactivity value of the stress measures (maximum-  
641 baseline). Peak reactivity is commonly used in stress research (Engert et al., 2013;  
642 Van Cauter & Refetoff, 1985), also to determine individuals with a cortisol increase  
643 below physiological relevance (“non-responders”; Engert et al., 2013; Miller et al.,  
644 2013; Van Cauter & Refetoff, 1985).

645 LMMs have the advantage of covering the trajectory of stress measures by including  
646 data from all timepoints (before, during, and after the intervention). However, this  
647 high number of observations in stress measures also adds a lot of variance  
648 compared to GMV data, available at only two time points, which may overfit the  
649 model. Please note that both LMMs and LMs (with  $\Delta$  values) are complementary  
650 analyses, which - since they are not built on the same data - cannot be directly  
651 compared with regard to variance explained (e.g., adjusted  $R^2$ ) or model fit (e.g.,  
652 Akaike Information Criterion AIC).

653 P values from LMMs and LMs were multiple comparison-corrected using Holm’s  
654 method (Holm, 1979; 6 stress measures, 2 analyses, LMM and LM, each = 12) as  
655 implemented in the *p.adjust* function of the *stats* package. In case of significance, the  
656 *emtrends* function from the *emmeans* package (Lenth, 2021) was used to extract the  
657 within-group estimates and test for a significant interaction effect. The *drop1* function  
658 was used to extract the estimates and *p* values for the single predictors.

659

660 *Association of VBM changes with other stress measures (LMMs):* Stress measures  
661 (saliva cortisol, plasma ACTH, HR, HRV, STAI score, and VAS score) were included



662 in separate full-model LMMs and tested against a null model without them. The  
663 model equation is depicted below;  $\beta_1$  denotes all two-way interactions and the  
664 main effects of all variables in the interaction term,  $u$  and  $e$  depict random intercepts  
665 per subject and subject residuals.

666 Full model:

$$\sqrt{GMV} \sim \beta_0 + \beta_1(Group \times Time \times StressMeasure) + \beta_2(Group \times Time) \\ + \beta_3(\dots) \beta_7 + \beta_8 Cluster + \beta_9 \log_e(MFD) + \beta_{10}(TIV) + u_{subject} \\ + \varepsilon_{subject}$$

667

668 Null model:

$$\sqrt{GMV} \sim \beta_0 + \beta_1(Group \times Time) + \beta_4 Cluster + \beta_5 \log_e(MFD) + \beta_6(TIV) \\ + u_{subject} + \varepsilon_{subject}$$

669

670 *Association of  $\Delta VBM$  with peak reactivity of other stress measures (LMs):*  $\Delta GMV$   
671 values were calculated by subtracting the pre- from the post-scan value.  $\Delta$  values of  
672 stress-measures (saliva cortisol, plasma ACTH, HR, HRV, STAI score, and VAS  
673 score) were peak reactivity values calculated by subtracting the baseline value from  
674 the maximum value within 15-45 minutes after intervention onset (Engert et al.,  
675 2013; Van Cauter & Refetoff, 1985). The assumptions for LMs were tested as  
676 described above for LMMs.

677  $\Delta GMV$  was the dependent variable in all models. The full model included group and  
678 peak reactivity of stress measures as well as their interaction and the mean of pre-  
679 and post-TIV as well as MFD as independent variables. This was compared against  
680 a null model lacking the peak reactivity of stress measures using an F-test.

681 Full model:

$$\Delta GMV \sim \beta_0 + \beta_1(Group \times Peak reactivity) + \beta_2(Group) \\ + \beta_3(Peak reactivity) + \beta_4(Cluster) + \beta_5(MFD) + \beta_6(TIV)$$

682

683 Null model:

$$\Delta GMV \sim \beta_0 + \beta_1(Group) + \beta_2(Cluster) + \beta_5(MFD) + \beta_6(TIV)$$

684

## 685 Results

### 686 Whole-brain VBM: significant interaction effect in 15 clusters

687 After quality assessment, the VBM was analysed in 63 participants: 30 in the stress  
688 group (TSST) and 33 in the control group (placebo-TSST). For an illustration of the  
689 final sample sizes for each parameter, see Figure S3. The results from the two-  
690 sample t-test on  $\Delta$ grey matter images ( $\Delta$ GM) were investigated using two-sided t-  
691 contrasts (i.e., control > stress and control < stress). The T contrast for control >  
692 stress did not yield statistically significant results. The opposite contrast (control <  
693 stress) showed a significant ( $p_{FWE} < 0.05$ ) effect in 16 clusters (see Table 1, Table  
694 S1 and Figure 2), including cortical midline structures (CMS) and bilateral insula.  
695 (The cluster with an extent of 1 voxel was excluded from further analyses). The  
696 unthresholded result maps can be found at  
697 <https://www.neurovault.org/collections/SFQXOIUB/>.

### 698 Post-hoc LMMs: three distinct change patterns

699 The VBM GM values from the whole-brain result clusters were extracted and the  
700 findings were tested in a post-hoc analysis using LMMs. In each individual VBM  
701 cluster, the full-null-model comparison showed a significant group-by-time interaction  
702 effect in all 15 clusters tested (see Table 1 for details). TIV explained a significant  
703 amount of variance (e.g., LSMFG:  $X^2(1) = 23.38$ ,  $p < 0.0001$ ) in 13 clusters, while  
704 MFD did not (e.g., LSMFG:  $X^2(1) = 0.60$ ,  $p < 0.4381$ ). Post-hoc tests revealed three  
705 patterns (Figure 2):

- 706 1) three clusters, including the Right Posterior Insula, showed a significant GMV  
707 increase in the stress group and a significant GMV decrease in the control  
708 group;
- 709 2) four clusters, including the Right Angular Gyrus and Left Mid-Cingulate  
710 Cortex, showed a significant GMV increase in the stress group and no  
711 significant change in the control group; and
- 712 3) eight clusters, including the biggest cluster in the anterior cortical midline (Left  
713 Superior Medial Frontal Gyrus) and the Left Anterior Insula, showed a

714 significant GMV decrease in the control group and no significant change in the  
715 stress group.

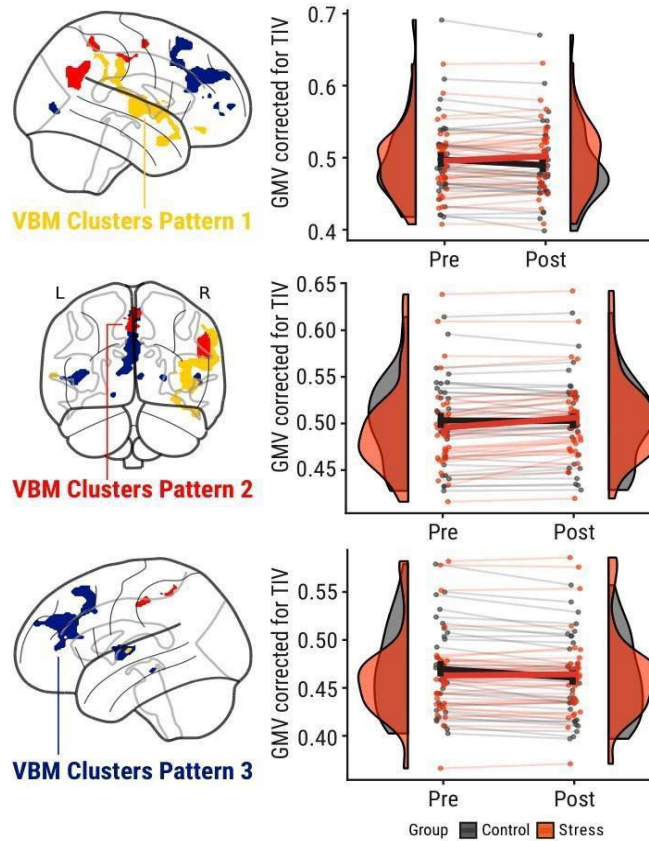

716

717

718 **Figure 2.** Left column: Voxel-based morphometry (VBM) results indicating a significant ( $p_{FWE}$   
719  $< 0.05$ ) group-by-time interaction effect on grey matter volume (GMV). Colours indicate three  
720 distinguishable patterns: pattern 1 (yellow) - control: decrease, stress: increase; pattern 2  
721 (red) - control: no significant change, stress: increase; pattern 3 (blue) - control: decrease,  
722 stress: no significant change. Right column: Changes in GMV group distributions (half violin)  
723 with individual changes (points, lines) and group means (central line with error bars).  $N = 63$   
724 (stress group:  $n = 30$ ).

725

726

727

728

729

|    | Hemis-<br>phere | Cluster Name                  | Cluster<br>Size | p <sub>FWE</sub><br>(TFCE) | x y z      | GMV Change<br>Pattern |
|----|-----------------|-------------------------------|-----------------|----------------------------|------------|-----------------------|
| 1  | L               | Superior Medial Frontal Gyrus | 2364            | 0.014                      | -03 50 30  | Pattern 3             |
| 2  | R               | (posterior) Insula            | 2441            | 0.015                      | 43 -12 04  | Pattern 2             |
| 3  | L               | (anterior) Insula             | 466             | 0.027                      | -40 -08 06 | Pattern 3             |
| 4  | R               | Angular Gyrus                 | 696             | 0.035                      | 54 -63 28  | Pattern 1             |
| 5  | L               | Parahippocampal Gyrus         | 35              | 0.038                      | 43 -12 04  | Pattern 3             |
| 6  | R               | Inferior Occipital Gyrus      | 118             | 0.042                      | 52 -80 03  | Pattern 3             |
| 7  | L               | Mid- Cingulate Cortex         | 160             | 0.042                      | -03 -24 46 | Pattern 1             |
| 8  | R               | Cerebro- Motor- Area          | 77              | 0.043                      | -04 -06 57 | Pattern 1             |
| 9  | R               | Lateral Orbital Gyrus         | 79              | 0.045                      | 36 39 -15  | Pattern 2             |
| 10 | R               | Precuneus                     | 141             | 0.046                      | 03 -50 57  | Pattern 1             |
| 11 | R               | Frontal Pole                  | 52              | 0.046                      | 24 63 03   | Pattern 3             |
| 12 | R               | Superior Medial Frontal Gyrus | 44              | 0.047                      | 06 52 04   | Pattern 3             |
| 13 | L               | Superior Temporal Gyrus       | 48              | 0.048                      | -63 -10 04 | Pattern 2             |
| 14 |                 | //                            | 1               | 0.048                      | 51 -46 51  |                       |
| 15 | R               | Middle Frontal Gyrus          | 22              | 0.048                      | 45 46 12   | Pattern 3             |
| 16 | R               | Middle Frontal Gyrus          | 23              | 0.050                      | 42 54 -02  | Pattern 3             |

730

731

732 **Table 1.** Results from the voxel-based morphometry (VBM) analysis on grey matter volume  
733 (GMV) in the VBM clusters. Depicted are hemisphere, cluster name (derived from CAT12's  
734 "neuromorphometrics atlas"), cluster size in voxels,  $p_{FWE}$  after threshold-free cluster  
735 enhancement (TFCE) correction, coordinates in MNI space (x y z), and change pattern as  
736 identified by post-hoc tests (see Figure 2). The cluster with an extent of 1 voxel was  
737 excluded from further analyses.  $P < 0.05$  indicates a significant group-by-time interaction  
738 effect.  $N = 63$  (stress group:  $n = 30$ ).

739

## 740 Significant group-differences in change of total GM and CSF 741 volume

742 A significant group-by-time interaction effect was found for total GMV ( $X^2(1) = 6.04$ ,  $p$   
743  $= 0.0140$ ) and CSF volume (CSFV;  $X^2(1) = 4.7$ ,  $p = 0.0305$ ), while no significant  
744 change was found for WM volume (WMV;  $X^2(1) = 0.20$ ,  $p = 0.657$ ). Post-hoc tests  
745 were not significant for total GMV (control:  $t/t_c(60.3) = -1.96$ ,  $p = 0.1084$ ; stress:  
746  $t/t_s(62.9) = 1.70$ ,  $p = 0.1084$ ) but qualitatively showed a decrease in the control group  
747 ( $-0.4\%$ ,  $\beta_c = -0.004$ ) and an increase in the stress group ( $0.4\%$ ,  $\beta_s = 0.004$ ). CSFV  
748 increased significantly in the control group ( $1.5\%$ ,  $\beta_c = 3.98$ ,  $t/t_c(60.2) = 2.6$ ,  $p =$   
749  $0.0232$ ) and decreased non-significantly in the stress group ( $-0.4\%$ ,  $\beta_s = -1.23$ ,  
750  $t/t_s(62.3) = -0.7$ ,  $p = 0.4857$ ).

751

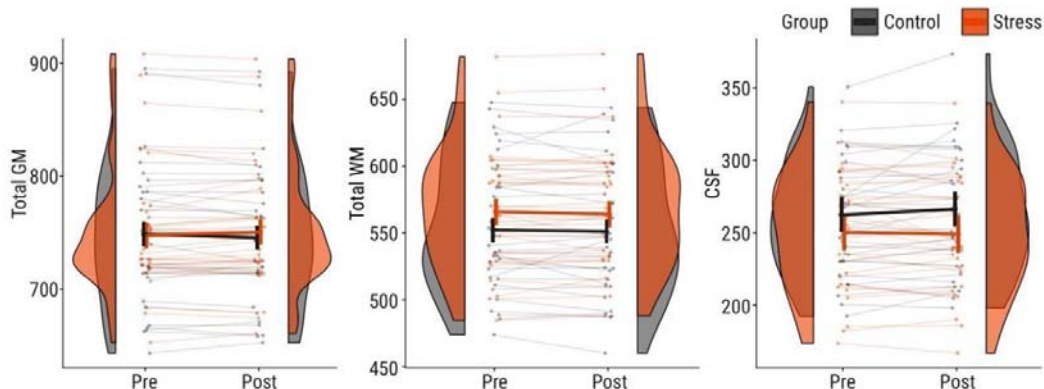

752

753 **Figure 3.** Change in total grey matter (GM), total white matter (WM), and total cerebrospinal  
754 fluid (CSF) volumes in the control group (grey) and in the stress group (red). Shown are  
755 scans (points) per subject (thin lines) and group distributions (half violin) for pre- and post-  
756 intervention scans. Bold lines indicate estimated marginal means and 95% confidence  
757 intervals obtained from linear mixed models. If data were transformed ( $\log_e$ ) for statistical  
758 analysis, the estimates were back-transformed for visualization.  $N = 63$  (stress group:  $n =$   
759  $30$ ).

## 760 Additional MR parameters in VBM clusters

761 GM T1 - but not T1w intensity values in GM increase in both groups

762 The group-by-time interaction effect found in the VBM data was not significant in the  
763 extracted T1 values ( $X^2(1) = 0.405$ ,  $p = 0.5246$ ). There was a significant time-by-  
764 cluster interaction effect ( $X^2(14) = 134.08$ ,  $p < 0.0001$ ), indicating an increase in T1  
765 values over time in 7 of the 15 clusters, which did not include the three biggest  
766 clusters in the SMFG and bilateral insula (Table S4, Figure S7). On average, the T1  
767 value increased (by  $\sim 48$  ms or  $\sim 3.4\%$ ) with time across groups. As can be seen in  
768 Table S4, the average T1 value at the pre- and post-intervention scan in clusters  
769 with significant increases in T1 values (e.g., Right Angular Gyrus) was (1) lower than  
770 in clusters without significant increases in T1 values (e.g., Right Posterior Insula) and  
771 (2) lower than expected in GM at 3T (1350 ms, Marques et al., 2010), which may  
772 reflect a contribution of white matter (T1 at 3T: 810 ms; Marques et al., 2010) due to  
773 partial volume effects. For clarification, we conducted the following supplementary  
774 analyses (see supplement, section 2.2. for details): We tested whether extracted T1  
775 values in GM voxels outside of the VBM clusters (but inside a GM mask) would also  
776 show a statistically significant change and found an increase of similar magnitude  
777 (by 29 ms or 2.4%;  $X^2(1) = 20.50$ ,  $p < 0.0001$ ). A binary GM mask was created by  
778 combining all GM images from our sample and thresholding their values based on  
779 the probability of each voxel being located in GM (between 0 and 1). In the main  
780 analysis, a threshold of 0.1 (10% probability that the voxels are located in GM) was  
781 used, as recommended in the CAT12 manual (Version 30-06-2021,  
782 <http://www.neuro.uni-jena.de/cat12/CAT12-Manual.pdf>). We compared T1 values  
783 within GM masks at different thresholds (0.1, 0.2, 0.3, 0.5). A significant increase in  
784 T1 values was found at thresholds of 0.1, 0.2, and 0.3 but not at 0.5 (see Table S5),

785 indicating that the T1 increase was driven by the edges of GM. That is, with an  
786 increasing threshold, the magnitude of the main effect of time decreased (0.1: 29 ms,  
787 0.2: 24 ms, 0.3: 20 ms), and at 0.5 (2 ms), the main effect was no longer observed.  
788 Of note, when the mask with 0.5 GM probability was applied before extracting GMV  
789 values, the majority of clusters was masked out and only 4 clusters could be  
790 included in the analysis (LSMFG, bilateral Insula, and MCC), none of which had  
791 shown a significant increase in T1 values before thresholding. We also investigated  
792 whether the definition of GM boundaries (i.e., using GM masks with thresholds of  
793 0.1, 0.2, 0.3, and 0.5) would affect our VBM results and found that 11 clusters were  
794 significant at a threshold of 0.3. The clusters in precuneus and the right posterior  
795 insula were robust even to a threshold of 0.5.

796 The group-by-time interaction effect found in the VBM data was not significant in the  
797 extracted T1-weighted intensity values ( $X^2(1) = 3.13$ ,  $p = 0.99$ ). The main effect of  
798 time was not significant either ( $X^2(1) = 2.16$ ,  $p = 0.141$ , Figure 4), but a significant  
799 main effect of group ( $X^2(1) = 6.9$ ,  $p = 0.0087$ ) indicated a difference in initial T1-  
800 weighted intensity values that remained constant over time (for follow-up analyses,  
801 see supplement, section 2.3).

## 802 Cerebral blood flow is not significantly increased at 1 hour after stress

803 For CBF, there was a significant group-by-time interaction across all included  
804 clusters ( $X^2(1) = 4.12$ ,  $p = 0.0425$ ). Post-hoc tests in both groups separately showed  
805 no significant effect in either group but indicated that CBF decreased in the control  
806 group (by 0.9 ml/100g/min or ~2.2%,  $t/t_c(942) = -1.57$ ,  $p(\text{cor}) = 0.2332$ ) and  
807 increased in the stress group (by 0.8 ml/100g/min or ~1.93%,  $t/t_s(942) = 1.296$ ,  $p =$   
808  $0.2332$ ), resembling pattern 1 of the VBM results (Figure 4). However, the  
809 interaction was driven by two participants in the control group, who showed an  
810 exceptionally large decrease in CBF (Figure 4). When they were removed from the  
811 analysis, the interaction did not remain significant ( $X^2(1) = 1.36$ ,  $p = 0.2436$ ) and CBF  
812 decreased only marginally in the control group (by 0.2 ml/100g/min or ~0.4%,  
813  $t/t_c(912) = -0.324$ ,  $p(\text{cor}) = 0.7463$ ).

814 In cluster-specific post-hoc tests, no CBF changes survived multiple-comparison  
815 correction (all  $p_{\text{corr}} > 0.29$ ). For more details of the CBF results, see supplement  
816 (Table S6 & S7, Figure S7).



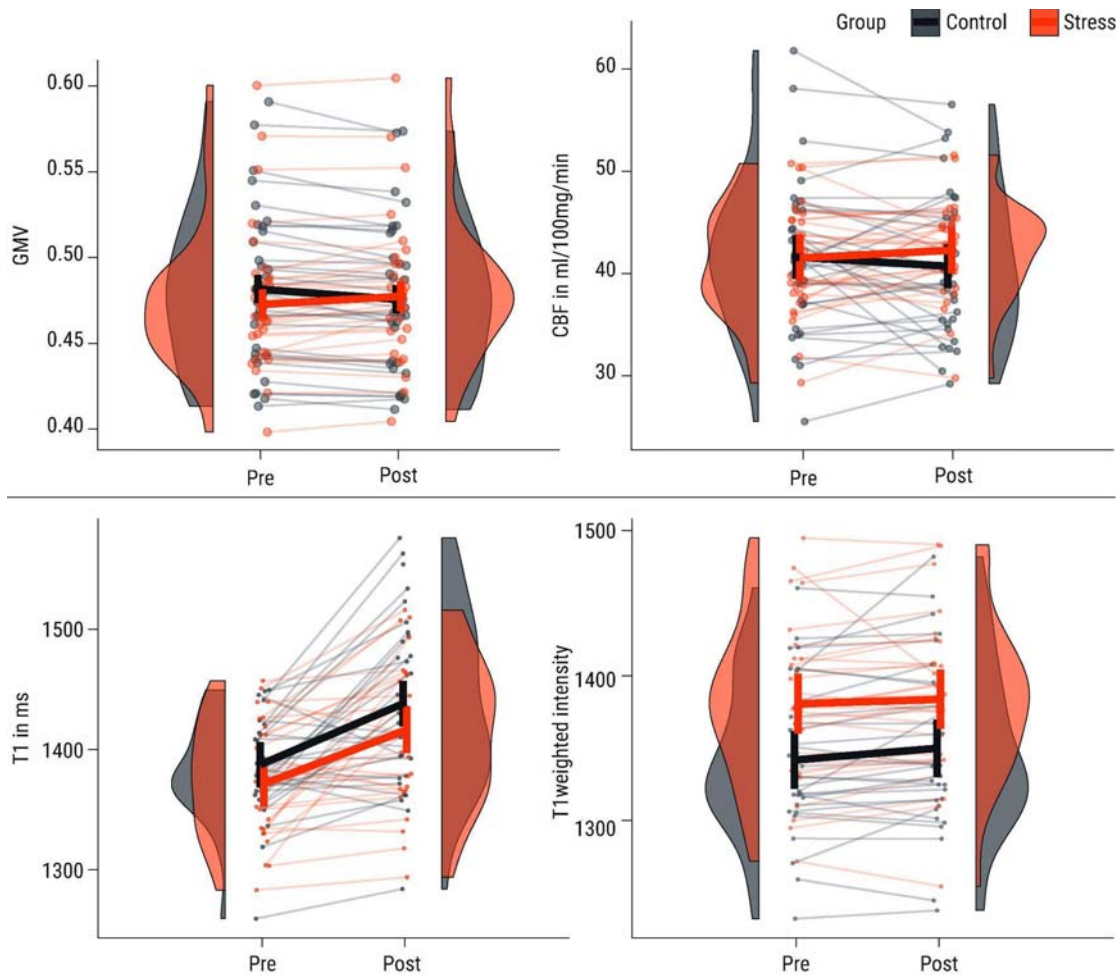

817

818 **Figure 4:** Change in grey matter volume (GMV), cerebral blood flow (CBF), T1, and T1-  
819 weighted intensity values in the control group (grey) and in the stress group (red). Shown are  
820 scans (points) per subject (thin lines) averaged across clusters and group distributions (half  
821 violin) for the pre- and post-intervention scan. Bold lines indicate estimated marginal means  
822 and 95% confidence intervals obtained from linear mixed models. If data were transformed  
823 ( $\log_e$  or square-root) for statistical analysis, the estimates were back-transformed for  
824 visualization.

825 Amygdala and Hippocampus show no significant change in  
826 GMV

827 Comparing the full to the null model showed no significant group-by-time interaction  
828 effect on GMV in the left Amygdala ( $X^2(1) = 0.60$ ,  $p = 0.4372$ ), right Amygdala ( $X^2(1)$   
829  $= 0.77$ ,  $p = 0.3803$ ), left Hippocampus ( $X^2(1) = 0.13$ ,  $p = 0.7227$ ), or right  
830 Hippocampus ( $X^2(1) = 0.02$ ,  $p = 0.8805$ ).

831 Robust stress response in autonomic, endocrine, and  
832 subjective stress measures

833 The TSST induced a robust stress response in autonomic, endocrine, and subjective  
834 stress measures, as also shown in previous publications from our study (Reinelt &  
835 Uhlig et al., 2019 and Bae & Reinelt et al., 2019). Significant ( $p_{\text{corr}} < 0.05$  with  
836 Bonferroni-Holm correction) group-by-time interaction effects were present in all  
837 investigated autonomic, endocrine, and subjective markers (Table 2 and Figure 5).

838 Post-hoc tests and visualization (Figure 5) show the dynamics of the stress  
839 response: subjective stress peaked earliest (+5 min) and saliva cortisol latest (+25  
840 min). Heart rate was the first parameter to return to baseline (+25 min) while the  
841 group difference in saliva cortisol remained longest (+90 min).

| Dependent Variable     | N  | DF | X <sup>2</sup> | P        |
|------------------------|----|----|----------------|----------|
| Saliva cortisol        | 64 | 8  | 309.1          | < 0.0001 |
| Plasma ACTH            | 57 | 8  | 216.6          | < 0.0001 |
| Heart rate             | 60 | 12 | 279.3          | < 0.0001 |
| Heart rate variability | 60 | 11 | 44.4           | < 0.0001 |
| State anxiety (STAI)   | 66 | 8  | 89.7           | < 0.0001 |
| VAS stressfulness      | 66 | 8  | 71.8           | < 0.0001 |

842

843 **Table 2.** Results from linear mixed models on autonomic, endocrine, and subjective stress  
844 measures. Statistical parameters were obtained from a full-null-model comparison. Fixed  
845 effects: time, group, group-by-time interaction (full model only); Random effects: participant.  
846 Depicted are degrees of freedom (DF), the X<sup>2</sup> and the *p* value from the full-null-model  
847 comparison. ACTH = adrenocorticotrophic hormone; STAI = State Anxiety Inventory.

848

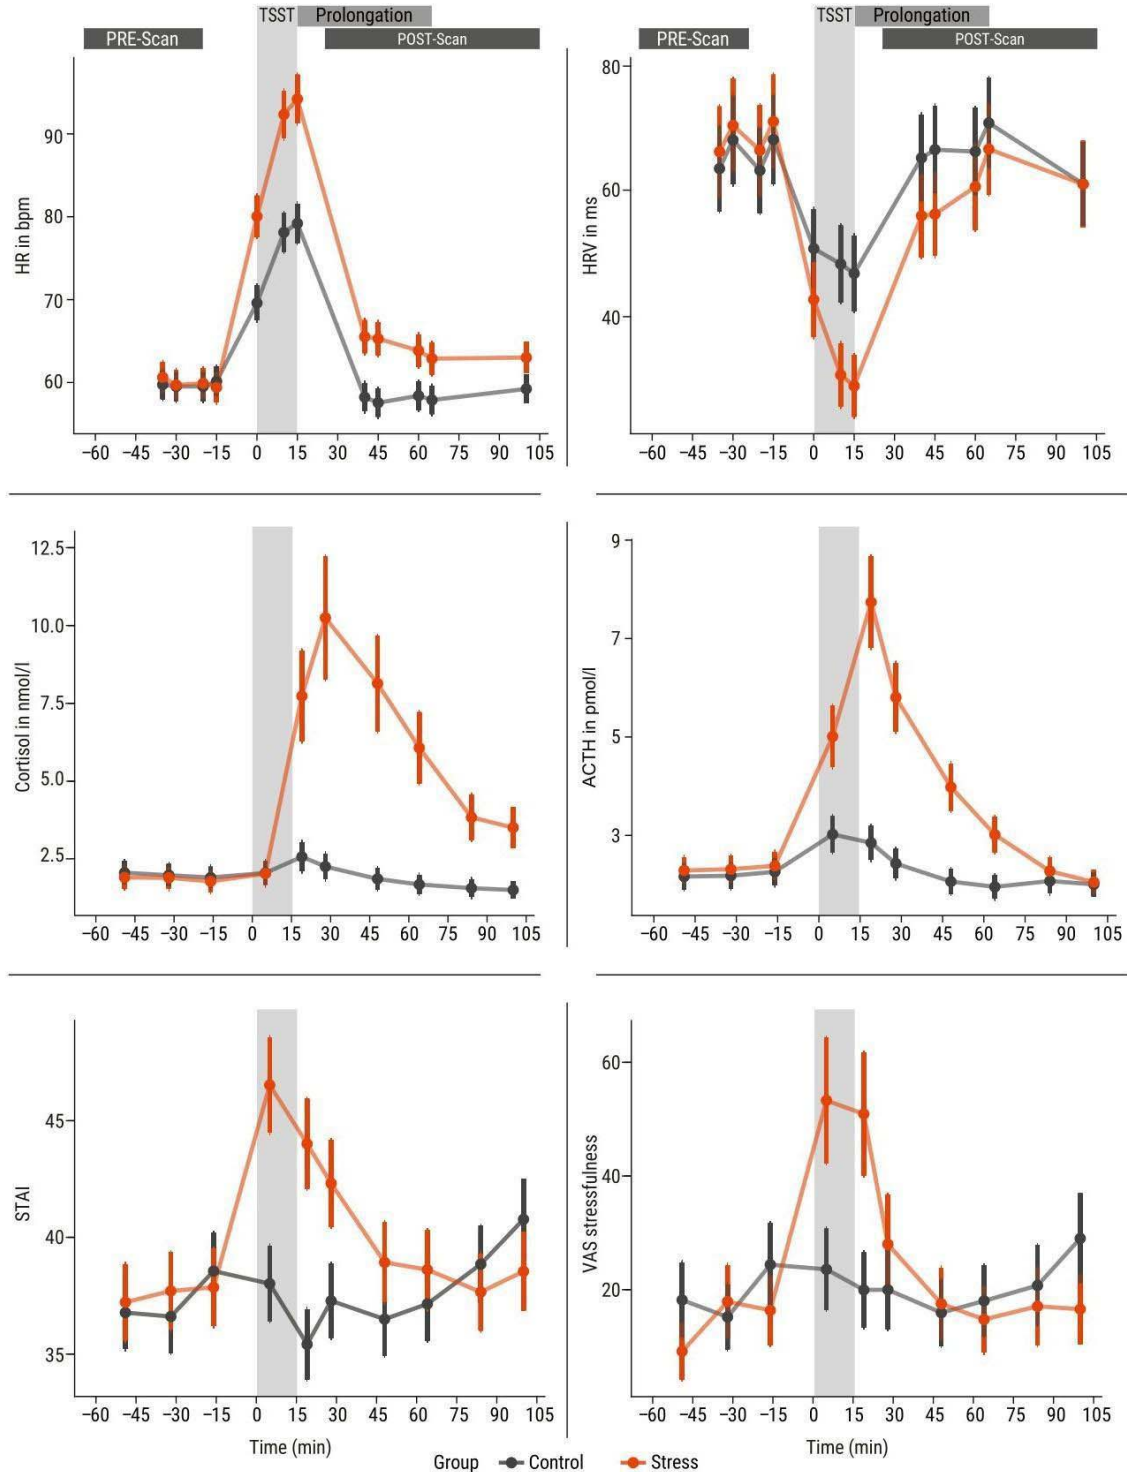

849

850 **Figure 5:** Time courses (x-axis: time of day) of saliva cortisol (nmol/l) and plasma  
 851 adrenocorticotrophic hormone (ACTH) (pmol/l) concentrations, heart rate (beats per minute)  
 852 and heart rate variability (RMSSD in ms) and subjective stress measured by state anxiety

853 (State Anxiety Inventory, STAI, sum score) and a visual analogue scale (VAS, score) of  
854 stressfulness. Plotted are the estimated marginal means from the linear mixed models (see  
855 above). If data were transformed ( $\log_e$  or square-root) for statistical analysis, the estimates  
856 were back-transformed for visualization. Error bars depict upper and lower 95% confidence  
857 intervals for model estimates. Grey: control group, orange: stress group. (Only timepoints  
858 between the two structural scans are included; for the full time courses and their statistical  
859 analysis, see Bae & Reinelt, et al., 2019; Reinelt & Uhlig, et al., 2019.)

## 860 Association of GMV with other stress measures in VBM clusters

861 LMM: no significant association of VBM changes with other stress measures

862 After multiple-comparison correction, no significant association of GMV changes with  
863 autonomic (HR and HRV), endocrine (saliva cortisol and plasma ACTH), and  
864 subjective (STAI score and VAS score) stress measures was found in any cluster in  
865 the LMM analysis (see Supplementary Table S3 and Figure S6 for details).

866 LM:  $\Delta$ GMV is significantly correlated with HRV and STAI peak reactivity

867 *Endocrine stress measures:* In the full-null-model comparison, there was no  
868 significant effect of saliva cortisol ( $F(2) = 0.63, p_{\text{corr}} = 1$ ) or plasma ACTH peak  
869 reactivity ( $F(2) = 2.03, p_{\text{corr}} = 0.1321$ ) on  $\Delta$ GMV (Figure S6).

870 *Autonomic stress measures:* In the full-null-model comparison, there was no  
871 significant effect of HR peak reactivity ( $F(2) = 3.51, p_{\text{corr}} = 0.2736$ , Figure S6) on  
872  $\Delta$ GMV. HRV peak reactivity ( $F(2) = 6.24, p_{\text{corr}} = 0.0224$ ) was significantly associated  
873 with  $\Delta$ GMV. Post-hoc tests showed no significant interaction effect for group ( $t/t(827)$   
874  $= -1.59, p = 0.1107$ ), but a negative association between HRV peak reactivity and  
875  $\Delta$ GMV both in the stress ( $\beta_s = -0.0000327$ ) and the control group ( $\beta_c = -0.0000885$ ).

876 In both groups, the participants who showed more pronounced HRV decreases also  
877 showed stronger GMV increases (or weaker GMV decreases, Figure 6).

878 *Subjective stress measures:* In the full-null-model comparison, there was a  
879 significant effect of STAI score peak reactivity on  $\Delta$ GMV ( $F(2) = 7.586, p_{\text{corr}} =$   
880  $0.0065$ ). Post-hoc tests showed a significant interaction effect with group ( $t/t(987) =$   
881  $2.335, p = 0.0197$ ) and a positive association between STAI score peak reactivity  
882 and  $\Delta$ GMV in the stress ( $\beta_s = 0.0000902$ ) and – even stronger – the control group

883 ( $\beta_c = 0.0003895$ ). In both groups, the participants who showed more pronounced  
884 STAI score increases also showed stronger GMV increases (or weaker GMV  
885 decreases, Figure 6).

886 In the full-null-model comparison, there was no significant effect of VAS  
887 stressfulness peak reactivity of  $\Delta$ GMV ( $F(2) = 3.879$ ,  $p_{\text{corr}} = 0.1894$ , Table S3, Figure  
888 S6).

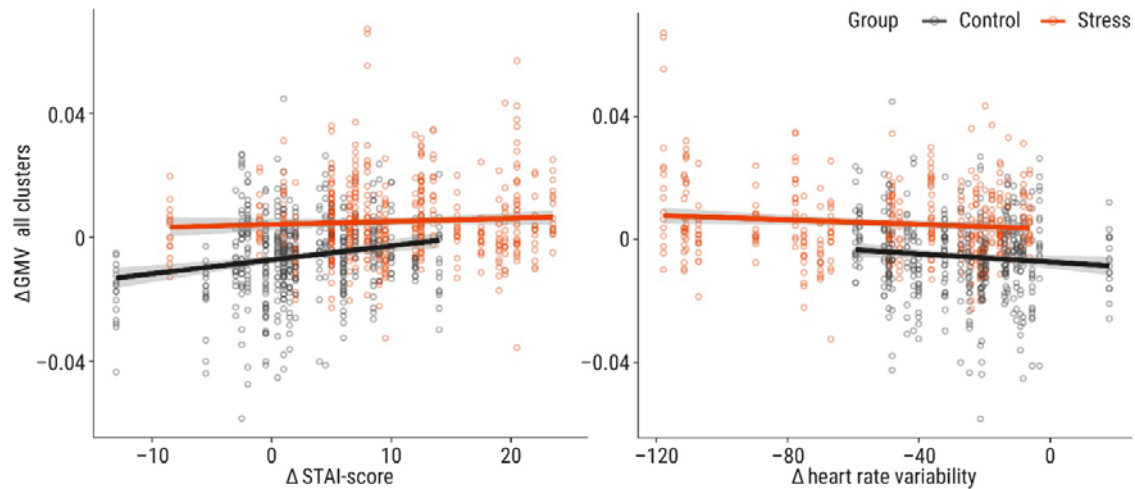

889

890 **Figure 6:** Association of  $\Delta$ grey matter volume (GMV; post-pre) with peak reactivity of stress  
891 measures. Shown are significant associations from linear models (LMs): state anxiety (State  
892 Anxiety Inventory, STAI; positive association) and heart rate variability (RMSSD; negative  
893 association). The LMs revealed no significant association with saliva cortisol, ACTH  
894 (Adrenocorticotrophic hormone), heart rate, and subjective stressfulness (Table S3, Figure  
895 S6). Line indicates slope and standard error. Points indicate GMV values per voxel-based  
896 morphometry (VBM) cluster and subject, each subject is represented in one column of  
897 points. Grey: control group, orange: stress group.

## 898 Discussion

899 Using voxel-based morphometry, we found rapid volumetric brain changes that  
900 differed between groups over time in 15 clusters, mainly along the cortical midline  
901 and in the bilateral insula. We identified three patterns of GMV changes across the  
902 clusters: the stress group showed a GMV increase (patterns 1 and 2) or no change  
903 (pattern 3) while the control group showed a GMV decrease (patterns 1 and 3) or no  
904 change (pattern 2). Our stress intervention induced a pronounced stress response  
905 on the autonomic, endocrine, and subjective levels. Changes in GMV were related to

906 peak reactivity in state anxiety and heart rate variability but not in heart rate, saliva  
907 cortisol, plasma ACTH, or subjective stressfulness.

908 To explore the microstructural and physiological basis of these findings, we also  
909 analysed quantitative T1 and CBF imaging parameters. The significant group  
910 difference over time was not present in T1 or T1-weighted intensity values. In T1  
911 values, a significant increase over time across groups occurred, which post-hoc tests  
912 showed to be significant in half of the clusters. CBF across VBM clusters non-  
913 significantly decreased in the control group and increased in the stress group. Thus,  
914 the stress-related brain changes are reflected in local GMV increases relative to the  
915 control group. In clusters with no significant GMV change, the increase may be  
916 masked by the GMV decrease observed in the control group. We did not observe the  
917 hypothesized GMV changes in hippocampus and amygdala.

918 In summary, we found that the dynamics of rapid volumetric brain changes differed  
919 between groups, suggesting that endogenous brain changes (GMV decrease) are  
920 counteracted by acute stress.

921 The rapidness of brain changes we detected with structural MR imaging methods  
922 raises the question of their physiological origins. Mouse studies have connected  
923 VBM changes to altered dendritic spine density: Aversive, stressful stimulation, like  
924 auditory fear conditioning (Keifer et al., 2015) or restraint (Kassem et al., 2013) led to  
925 volumetric changes, measured with volumetric MRI (Kassem et al., 2013) or VBM  
926 (Keifer et al., 2015), which were correlated with spine density changes in functionally  
927 relevant regions, such as amygdala and insula (Keifer et al., 2015) as well as ACC  
928 (Kassem et al., 2013). Synaptic and dendritic plasticity may be detectable after  
929 minutes to hours (Johansen-Berg et al., 2012); however, we would expect subtle T1  
930 shortening from such processes due to an increase in the amount of membranes  
931 and macromolecules and concomitantly reduced water content (Fullerton et al.,  
932 1982) whereas longer T1 values were observed in both groups with masks  
933 thresholded at GM probabilities  $\leq 0.3$ . Changes to dendritic morphology may further  
934 be accompanied by migration or swelling of capillaries and glia in order to



935 compensate for heightened energy demand resulting in increased tissue volume,  
936 which manifests itself as GMV changes detected by VBM (Lövdén et al., 2013). Glial  
937 cells have been shown to react to sensory stimulation (Tremblay et al., 2010) and  
938 can modulate plasticity and learning processes (Jammal et al., 2018).

939 Especially astrocytic glia cells are prominent candidates for targeting cellular  
940 structures in brain plasticity. These non-myelinating glia cells are involved in  
941 neuronal metabolism and fluid homeostasis, and they can mediate the excitability of  
942 neurons (Shao & McCarthy, 1994). Activation may cause astrocytes to swell within  
943 seconds or minutes, which has been shown to affect diffusion-weighted MRI  
944 measures (Johansen-Berg et al., 2012) and may also affect estimates of GMV.  
945 Astrocytes also express corticosteroid receptors (Bohn et al., 1991), and their  
946 structure and function can be influenced by chronic (Tynan et al., 2013) as well as  
947 acute stress (Braun et al., 2009). Stress-induced astrocyte plasticity has also been  
948 linked to stress-related psychiatric diseases (for reviews, see Bender et al., 2016;  
949 Cathomas et al., 2022).

950 Thus, the observed GMV changes may reflect (transient) local tissue changes and/or  
951 vascular changes to accommodate changes in energy demand following neural  
952 activity. These alterations, which are present more than an hour after the stress  
953 episode, may also be related to the induction of – potentially long-term –  
954 morphological changes.

955 In addition to a stress-induced increase in GMV, we also found local GMV decreases  
956 in the control group. A linear decrease in total GMV of similar magnitude (~1%) from  
957 morning to afternoon has been shown in Karch et al., 2019 and Trefler et al., 2016,  
958 which was accompanied by regional GMV changes, for example, in the MPFC and  
959 precuneus (Trefler et al., 2016). In our study, the two structural scans were  
960 separated by approximately 2.5 hours, from early to late afternoon. We also found  
961 total GMV to decrease and CSF to increase from early to late afternoon in the control  
962 group, following the pattern of circadian rhythm-related GMV changes reported in  
963 Trefler et al. (2016). In the stress group, total GM and CSF non-significantly in the  
964 opposite direction compared to the control group: GM increased and CSF  
965 decreased. Exogenous behavioural interventions have been shown to attenuate



966 endogenous daytime effects on GMV (Trefler et al., 2016; Thomas et al., 2016) and  
967 so may a stressful intervention like the TSST.

968 We thus speculate that processes related to the circadian rhythm (i.e., supporting  
969 diurnal brain homeostasis; Trefler et al. 2016) contribute to the changes in our  
970 control group, while in the stress group, the behavioural intervention counteracts  
971 these processes. However, since we chose an active control group, we cannot rule  
972 out the possibility that the control intervention triggered brain changes detectable  
973 with VBM.

974 Extracted T1 values (at GM > 0.1) showed a significant increase over time in both  
975 groups and in seven of the 15 VBM clusters but no significant group difference, that  
976 is, the VBM interaction was not mirrored in T1 values. Moreover, diminishing T1  
977 increases were obtained with increasing GM thresholds until no changes remained  
978 at a threshold of 0.5. This suggests a stronger contribution of CSF through partial  
979 volume effects in those clusters in the post- compared to the pre-scan. This  
980 “apparent” increase in T1 values (thresholded at GM > 0.1) was not limited to the  
981 VBM clusters but occurred in all GM, probably driven by effects at the GM  
982 boundaries. Decreased GMV along with increased CSFV has been reported in  
983 association with daytime (Trefler et al., 2016) but also following dehydration  
984 (Streitbürger et al., 2012). We minimized the variability of food and fluid intake by  
985 providing a standardized lunch, but we did not measure the participants’ hydration  
986 status and cannot exclude the possibility of group differences in hydration. Yet, in  
987 Streitbürger et al. (2012), dehydration mainly affected GMV in areas close to the  
988 ventricles rather than cingulate and insular cortices (the main VBM clusters in our  
989 results), and dehydration-induced effects should occur in both groups alike.  
990 However, while T1 increased in both groups, a significant increase in total CSFV was  
991 found in the control group but not in the stress group. It is possible that differentially  
992 altered cellular volume following water migration is reflected in an increase in T1 as  
993 well as in a differential change in tissue volume estimation by VBM. It has previously  
994 been shown that neural activity is associated with cell swelling and accompanied by  
995 a fluid shift from extra- to intracellular space (Sykova 1997), and it has been  
996 proposed that such processes could be picked up by VBM as an apparent increase  
997 in GMV (Naegel et al, 2017).

998 Applying our assumption about an endogenous homeostatic process being  
999 counteracted by processes accompanying stress-induced neural activity here, we  
1000 can speculate about the following mechanisms: 1) endogenous fluid shifts, which  
1001 occur in both groups (possibly hydration- or daytime-related), are reflected in an  
1002 apparent increase in T1 values. These changes are accompanied by 2) cell  
1003 shrinkage in the control group, reflected in a VBM-estimated decrease in GMV and  
1004 increase in CSF volume (CSFV) as well as 3) cell swelling (following stress-induced  
1005 neural activity) in the stress group, reflected in a VBM-estimated increase in GMV  
1006 and decrease in CSFV, with simultaneously increased T1 values. Different patterns  
1007 of fluid shifts between compartments may thus explain the divergence between the  
1008 T1 and the VBM results. It needs to be noted that such inter-compartmental fluid  
1009 shifts remain speculative as they happen too quickly to be picked up by our MRI  
1010 sequences.

1011 In summary, GMV decreases in the control group may reflect changes in fluid  
1012 homeostasis (e.g., associated with the circadian rhythm) along with cell swelling or  
1013 shrinkage. In the stress group, such processes may be counteracted by processes  
1014 that regulate the energy demand following neuronal activation in response to the  
1015 stressful intervention. This increased energy demand following brain activity under  
1016 stress may also be reflected in increased CBF, which has been shown to affect VBM  
1017 measures of GMV (Ge et al., 2017).

1018

1019 Consistent with the overall GMV decrease in the control group, we find non-  
1020 significantly decreased CBF in that group across all clusters (although this appears  
1021 to be mainly driven by few participants). We also found CBF increases in the stress  
1022 group in the left and right SMFG, which, however, also did not survive multiple-  
1023 comparison correction. CBF increases have previously been shown (using ASL)  
1024 during an in-scanner stressor, for example in the right PFC, ACC, insula, and  
1025 putamen (Wang et al., 2005). Many brain vessels are located along the medial wall,  
1026 including the middle cerebral artery, but also the insula displays a particularly high  
1027 density of vessels, including the anterior cerebral artery (Mouches & Forkert, 2019).  
1028 Thus, our main VBM clusters (bilateral SMFG and insula) are in the vicinity of major  
1029 vessels. During stress-induced physiological activity, changes in blood parameters  
1030 (e.g., blood flow) and vasodilation could influence the VBM analysis. However, we

1031 did not find significant stress-induced CBF increases. One reason may be the limited  
1032 sensitivity of the pASL analysis due to the relatively low resolution, the time delay to  
1033 the intervention (~90 min) or limited spatial coverage (Figure S2). On the other hand,  
1034 previous studies have shown overlapping but incongruent patterns of CBF and VBM  
1035 changes (Ge et al., 2017, Franklin et al., 2013), which may indicate that other  
1036 processes, such as changes in brain metabolites in response to functional activation,  
1037 may affect the T1-weighted signal and thus contribute to apparent GMV changes  
1038 measured with VBM (Ge et al., 2017). Especially in highly vascularized areas,  
1039 hemodynamically induced GMV changes may also arise from changes in cerebral  
1040 blood volume, (Kim and Ogawa, 2012), which we did not assess.

1041 In addition, it has been proposed that an intervention-induced increase in oxygen-  
1042 demand in specific brain areas may similarly affect estimations of GMV and  
1043 decrease T1 values through changes in CBF and tissue oxygenation (Tardif et al.,  
1044 2017). Here, we find no intervention-specific effect but increased T1 values in both  
1045 groups. Given the time delay of > 1hr to the intervention, hemodynamic changes  
1046 may have normalized until the MP2RAGE and pASL scan.

1047 In summary, while changes in CBF mirror the pattern of our VBM results, we find  
1048 limited evidence for a hemodynamic origin of GMV changes. Previous studies have  
1049 found incongruent patterns of BOLD activation and volume or thickness changes  
1050 (Olivo et al., 2022, Zaretskaya et al., 2022).

1051 Functionally, the main clusters of stress related VBM changes in cortical midline  
1052 structures (CMS) and bilateral insula can be related to the processing of  
1053 emotional/stressful and self-relevant information.

1054 The biggest cluster extended from the superior medial frontal cortex to the anterior  
1055 cingulate cortex. Functionally, the medial frontal cortex has been involved in emotion  
1056 processing (Etkin et al., 2011) and in the regulation of the physiological and  
1057 behavioural stress response (McKlveen et al., 2015). It also has a high density of  
1058 glucocorticoid receptors, which are central to the negative feedback mechanism of  
1059 the HPA axis (Buchanan et al., 2010). Yet, we found no significant association of  
1060 GMV with endocrine stress measures.

1061 A significant association was found with the subjective and autonomic stress  
1062 measures of state anxiety (STAI) and HRV, respectively. Decreased HRV correlated

1063 inversely with GMV changes in both groups, suggesting that control participants  
1064 whose parasympathetic activity changed similarly to participants in the stress group  
1065 showed less decrease in GMV than other control participants. In parallel, higher  
1066 state anxiety was associated with less GMV decrease in both groups, but even  
1067 stronger in the control group. These results indicate that parasympathetic  
1068 deactivation and state anxiety, which can result from psychological stress, are  
1069 linearly associated with GMV changes, and counteract the GMV decrease. In  
1070 general, CMS – especially anterior ones – have been associated with self-  
1071 relatedness and self-relevance (for a review, see Northoff & Bermpohl, 2004), a  
1072 feature of any stressor and particularly of the TSST, in which participants “apply” for  
1073 their individual dream jobs. Although participants knew the job interview was not real,  
1074 they showed pronounced stress responses. Negative self-relevant stimuli and  
1075 psychosocial stress have been shown to increase activity in CMS (e.g., MPFC;  
1076 Lemogne et al., 2011) as well as connectivity between the amygdala and CMS (Veer  
1077 et al., 2011), respectively.

1078 In our study, two major clusters of stress-related GMV changes showed peaks in the  
1079 left anterior insula and the right posterior insula. The insula has been understood as  
1080 primary viscerosensory or interoceptive cortex with a posterior-to-anterior gradient  
1081 (Craig, 2002): pain, temperature, and other homeostatically relevant bodily stimuli  
1082 enter the posterior insula before they are integrated with other (e.g., exteroceptive)  
1083 information and evaluated in the anterior insula, influencing subjective experience  
1084 and guiding behaviour (Craig, 2002). The insula is also highly connected and often  
1085 co-active with frontal CMS (e.g., MPFC and ACC), where the strongest cluster of  
1086 stress-related GMV changes was found in our study, and they constitute a central  
1087 axis of the salience network, which processes homeostatically relevant stimuli  
1088 (Seeley, 2019). The integrative, multisensory function of the insula is also supported  
1089 by animal studies showing, for example, that the posterior insula can shift  
1090 behavioural strategies upon the detection of aversive or stressful interoceptive states  
1091 (Gehrlach et al., 2019).

1092 We have previously shown increased connectivity in the thalamus in response to  
1093 stress (Reinelt & Uhlig et al., 2019), also to medial frontal regions and the insula  
1094 (exploratory seed-based connectivity analysis in Reinelt & Uhlig, 2019), which  
1095 showed stress-related GMV changes in the present study. The thalamus and the

1096 insula are part of the salience network (Hermans et al., 2014) and have been linked  
1097 to interoception (thalamus: Barson, Mack, & Gao, 2020; Dobrushina et al., 2021;  
1098 insula: Craig, 2002) as well as autonomic nervous system regulation (thalamus:  
1099 Buijs, 2013; insula: Thayer & Lane, 2000). We can thus speculate that the increase  
1100 in thalamic centrality reflects its role as a central hub for resource allocation (Garrett  
1101 et al., 2018) to a variety of regions, some of which also show GMV changes. As an  
1102 exploratory follow-up analysis, we investigated GMV changes in the thalamus cluster  
1103 derived from the significant group-by-time interaction effect on EC values (Reinelt et  
1104 al., 2019). This revealed no significant interaction effect, but a decrease in GMV  
1105 across both groups in the thalamic cluster (For details, see supplement, section  
1106 2.1.2.).

1107 In contrast to our hypothesis, we did not find significant GMV changes in  
1108 hippocampus and amygdala. In the framework by Hermans et al. (2014), during and  
1109 after acute stress, resources are allocated to the salience and (estimated at 1 hour  
1110 after stressor onset) the executive control network, respectively. The post-  
1111 intervention MRI was acquired 90 mins after stressor onset, which may coincide with  
1112 the “downregulation” of the salience network (Hermans et al., 2014). Other studies  
1113 have suggested an even earlier deactivation of limbic structures including the  
1114 hippocampus and the amygdala during stress exposure (Pruessner et al., 2008)

1115 In animal models of acute stress (Kassem et al., 2013, Chakraborty et al. 2020) and  
1116 in stress-related mental disorders in humans (Chen et al., 2006; Karl et al., 2006)  
1117 stress-induced brain structural changes in hippocampus and amygdala are found. At  
1118 subclinical levels of chronic stress however, some studies did find changes in GMV  
1119 (Dedovic et al., 2010; Savic, 2015; Suffren et al., 2021; Spalletta et al., 2014), but  
1120 others did not: GMV reductions associated with stressful life events were, for  
1121 example, found in the ACC, hippocampus, and parahippocampal gyrus, but not in  
1122 the amygdala (Papagni et al., 2011) as well as in the MPFC and right insula, but not  
1123 in the hippocampus or amygdala (Ansell et al., 2012). Possibly, GMV alterations in  
1124 hippocampus and amygdala may be related to pathophysiological processes in the  
1125 context of chronic or severe stress (Ansell et al., 2012) rather than the brain  
1126 response to acute stress.

1127

## 1128 Limitations

1129 There are several limitations to our study. VBM can be considered a physiologically  
1130 coarse method, and, despite several candidate processes (discussed above), the  
1131 physiological origin of GMV changes remains unclear. VBM has also been criticized  
1132 for introducing bias and neglecting non-linear effects, which are more pronounced  
1133 when comparing heterogeneous groups (Bookstein, 2001; Davatzikos, 2004).  
1134 Another limiting factor of our analysis is the spatial resolution. While a smoothing  
1135 kernel of 6-8mm is recommended (see CAT12 manual) to optimize the data  
1136 distribution and reduce the number of comparisons in a whole brain analysis, this  
1137 reduces spatial accuracy. To estimate the influence of the smoothing kernel size, we  
1138 repeated the VBM analysis with a smaller smoothing kernel: Decreasing the  
1139 smoothing kernel to 6mm isotropic (FWHM) results in overall fewer and smaller  
1140 clusters within the same main result regions as with the 8-mm smoothing kernel (see  
1141 supplement, section 2.1.1.2.). By comparing two (randomly assigned) groups from a  
1142 homogenous sample in our study, we expected to minimize such potential biases.  
1143 The inclusion of young, healthy, male participants allowed us to investigate stress-  
1144 induced changes using a multimodal approach without confounds like the impact of  
1145 the ovarian cycle. However, the generalisability of our results remains to be tested in  
1146 studies with more heterogeneous samples. The significant group-by-time interaction  
1147 effect on GMV suggests that the differences are intervention-induced. While we kept  
1148 the procedure as similar as possible between groups, we extended the TSST  
1149 stressor by telling participants in the stress but not the control group there would be  
1150 another task. Thus, it is possible that not the TSST alone but the prolongation of the  
1151 stressor (or stress-related vigilance) in the stress group accounts for the group  
1152 difference in GMV. Furthermore, a higher temporal resolution would add information  
1153 about the trajectory of changes and about possible immediate transient changes and  
1154 the stability of changes we observed in the stress and in the control group. We asked  
1155 participants to refrain from drinking coffee in the morning to avoid caffeine effects on  
1156 HPA axis activity (Patz et al., 2005). However, coffee can be an important part of the  
1157 morning routine and its absence might have psychological (e.g., well-being) and  
1158 physiological (e.g., metabolism) effects on regular coffee drinkers. Since we did not  
1159 acquire information on coffee consumption habits, we cannot quantify such effects  
1160 as well as potential group differences. We specifically investigated the effects of



1161 psychosocial stress in this study. To what extent findings generalize to other stressor  
1162 types (e.g., physical stress) remains unclear. Head motion is a major neuroimaging  
1163 confound (Beyer et al., 2020.), and it can decrease measures of GMV (Reuter et al.,  
1164 2015). We aimed to physically minimize head motion during data acquisition and  
1165 included the realignment / motion parameter MFD from the preceding resting-state  
1166 scans as a proxy covariate in the VBM analyses. Head motion parameters (e.g.,  
1167 using gyrometry or video-based measures) from the actual MP2RAGE scan could be  
1168 acquired using additional hardware.

## 1169 Conclusion

1170 We find rapid brain changes following a psychosocial stress intervention compared  
1171 to a placebo version of that task. Brain changes are observed in areas associated  
1172 with the processing of emotional and self-relevant information but also with  
1173 regulating HPA axis activity and sympathetic arousal. Stressed participants  
1174 additionally show (non-significantly) increased cerebral blood flow in prefrontal  
1175 areas. While CBF mirrors the VBM changes, neither T1, T1-weighted intensity, nor  
1176 CBF fully account for the observed group differences over time in GMV. Our findings  
1177 of rapid GMV changes following acute psychosocial stress detected with MRI in  
1178 humans emphasize the influence of stress on the brain, suggesting that diurnal  
1179 mechanisms of brain homeostasis are perturbed by acute stress.

## 1180 Acknowledgements

1181 The visualization functions for LMM diagnostics were kindly provided by Dr. Roger  
1182 Mundry.

## 1183 Conflict of Interest

1184 We have no conflicts of interest to declare.

## 1185 Data and code availability statement

1186 The data that support the findings of this study are openly available at  
1187 <https://osf.io/vjyan/>. In agreement with participant consent, this includes derived data,  
1188 which cannot be used to identify individual participants. The code to reproduce the  
1189 analyses can be found at <https://gitlab.gwdg.de/necos/vbm.git>.



## 1190 References

- 1191 Allen, M., Poggiali, D., Whitaker, K., Marshall, T. R., & Kievit, R. A. (2019). Raincloud  
1192 plots: a multi-platform tool for robust data visualization. *Wellcome Open*  
1193 *Research*, 4, 63. <https://doi.org/10.12688/wellcomeopenres.15191.1>
- 1194 Ansell, E. B., Rando, K., Tuit, K., Guarnaccia, J., & Sinha, R. (2012). Cumulative  
1195 Adversity and Smaller Gray Matter Volume in Medial Prefrontal, Anterior  
1196 Cingulate, and Insula Regions. In *Biological Psychiatry*, 72(1), 57–64.  
1197 <https://doi.org/10.1016/j.biopsych.2011.11.022>
- 1198 Ashburner, J., & Friston, K. J. (2000). Voxel-based morphometry--the methods.  
1199 *NeuroImage*, 11(6 Pt 1), 805–821. <https://doi.org/10.1006/nimg.2000.0582>
- 1200 Ashburner (2007): A fast diffeomorphic image registration algorithm. *Neuroimage*  
1201 38(1):95-113.
- 1202 Babayan, A., Erbey, M., Kumral, D., Reinelt, J. D., Reiter, A. M. F., Röbbig, J., Lina  
1203 Schaare, H., Uhlig, M., Anwander, A., Bazin, P.-L., Horstmann, A., Lampe, L.,  
1204 Nikulin, V. V., Okon-Singer, H., Preusser, S., Pampel, A., Rohr, C. S., Sacher,  
1205 J., Thöne-Otto, A., ... Villringer, A. (2019). A mind-brain-body dataset of MRI,  
1206 EEG, cognition, emotion, and peripheral physiology in young and old adults.  
1207 *Scientific Data*, 6(1). <https://doi.org/10.1038/sdata.2018.308>
- 1208 Bae, Y. J., Reinelt, J., Netto, J., Uhlig, M., Willenberg, A., Ceglarek, U., Villringer, A.,  
1209 Thiery, J., Gaebler, M., & Kratzsch, J. (2019). Salivary cortisone, as a biomarker  
1210 for psychosocial stress, is associated with state anxiety and heart rate.  
1211 *Psychoneuroendocrinology*, 101, 35–41.  
1212 <https://doi.org/10.1016/j.psyneuen.2018.10.015>
- 1213 Barth, C., Steele, C. J., Mueller, K., Rekkas, V. P., Arélin, K., Pampel, A., Burmann,  
1214 I., Kratzsch, J., Villringer, A., & Sacher, J. (2016). In-vivo Dynamics of the  
1215 Human Hippocampus across the Menstrual Cycle. *Scientific Reports*, 6, 32833.  
1216 <https://doi.org/10.1038/srep32833>
- 1217 Barson, J. R., Mack, N. R., & Gao, W.-J. (2020). The Paraventricular Nucleus of the  
1218 Thalamus Is an Important Node in the Emotional Processing Network. *Frontiers*  
1219 *in Behavioral Neuroscience*, 14, 191.

- 1220 <https://doi.org/10.3389/fnbeh.2020.598469>
- 1221 Bates, D., Mächler, M., Bolker, B., & Walker, S. (2015). Fitting Linear Mixed-Effects  
1222 Models Using lme4. *Journal of Statistical Software*, 67(1).  
1223 <https://doi.org/10.18637/jss.v067.i01>
- 1224 Bender, C. L., Calfa, G. D., & Molina, V. A. (2016). Astrocyte plasticity induced by  
1225 emotional stress: A new partner in psychiatric physiopathology? *Progress in*  
1226 *Neuro-Psychopharmacology & Biological Psychiatry*, 65, 68–77.  
1227 <https://doi.org/10.1016/j.pnpbp.2015.08.005>
- 1228 Beyer, F., Prehn, K., Wüsten, K. A., Villringer, A., Ordemann, J., Flöel, A., & Witte, A.  
1229 V. (2020). Weight loss reduces head motion: re-visiting a major confound in  
1230 neuroimaging. *Human Brain Mapping*, 41(9), 2490–2494,  
1231 <https://doi.org/10.1101/766261>
- 1232 Bohn, M. C., Howard, E., Vielkind, U., & Krozowski, Z. (1991). Glial cells express  
1233 both mineralocorticoid and glucocorticoid receptors. *The Journal of Steroid*  
1234 *Biochemistry and Molecular Biology*, 40(1-3), 105–111.  
1235 [https://doi.org/10.1016/0960-0760\(91\)90173-3](https://doi.org/10.1016/0960-0760(91)90173-3)
- 1236 Bookstein, F. L. (2001). “Voxel-based morphometry” should not be used with  
1237 imperfectly registered images. *NeuroImage*, 14(6), 1454–1462.  
1238 <https://doi.org/10.1006/nimg.2001.0770>
- 1239 Braun, K., Antemano, R., Helmeke, C., Büchner, M., & Poeggel, G. (2009). Juvenile  
1240 separation stress induces rapid region- and layer-specific changes in S100ss-  
1241 and glial fibrillary acidic protein-immunoreactivity in astrocytes of the rodent  
1242 medial prefrontal cortex. *Neuroscience*, 160(3), 629–638.  
1243 <https://doi.org/10.1016/j.neuroscience.2009.02.074>
- 1244 Buchanan, T. W., Driscoll, D., Mowrer, S. M., Sollers, J. J., 3rd, Thayer, J. F.,  
1245 Kirschbaum, C., & Tranel, D. (2010). Medial prefrontal cortex damage affects  
1246 physiological and psychological stress responses differently in men and women.  
1247 *Psychoneuroendocrinology*, 35(1), 56–66.  
1248 <https://doi.org/10.1016/j.psyneuen.2009.09.006>
- 1249 Buijs, R. M. (2013). The autonomic nervous system: A balancing act. In *Handbook*  
1250 *of Clinical Neurology* (Vol. 117, pp. 1–11). <https://doi.org/10.1016/B978-0-444->

- 1251 53491-0.00001-8
- 1252 Cathomas F, Holt LM, Parise EM, Liu J, Murrough JW, Casaccia P, Nestler EJ,  
1253 Russo SJ. Beyond the neuron: Role of non-neuronal cells in stress disorders.  
1254 *Neuron*. 2022 Apr 6;110(7):1116-1138. doi: 10.1016/j.neuron.2022.01.033.
- 1255 Chakraborty, P., Datta, S., McEwen, Bruce S., Chattarji, S. (2020) Corticosterone  
1256 after Acute Stress Prevents the Delayed Effects on the Amygdala.  
1257 *Neuropsychopharmacology*, 45(13), 2139–46. [https://doi.org/10.1038/s41386-](https://doi.org/10.1038/s41386-020-0758-0)  
1258 [020-0758-0](https://doi.org/10.1038/s41386-020-0758-0).
- 1259 Chen, S., Xia, W., Li, L., Liu, J., He, Z., Zhang, Z., Yan, L., Zhang, J., & Hu, D.  
1260 (2006). Gray matter density reduction in the insula in fire survivors with  
1261 posttraumatic stress disorder: a voxel-based morphometric study. *Psychiatry*  
1262 *Research*, 146(1), 65–72. <https://doi.org/10.1016/j.psychresns.2005.09.006>
- 1263 Chen, Y., Rex, C. S., Rice, C. J., Dubé, C. M., Gall, C. M., Lynch, G., & Baram, T.  
1264 Z. (2010). Correlated memory defects and hippocampal dendritic spine loss  
1265 after acute stress involve corticotropin-releasing hormone signaling.  
1266 *Proceedings of the National Academy of Sciences*, 107(29), 13123–13128.  
1267 <https://doi.org/10.1073/pnas.1003825107>
- 1268 Chrousos, G. P. (2009). Stress and disorders of the stress system. *Nature Reviews*  
1269 *Endocrinology*, 5 (7), 374–381. <https://doi.org/10.1038/nrendo.2009.106>
- 1270 Cohen, S., Tyrrell, D. A., & Smith, A. P. (1991). Psychological stress and  
1271 susceptibility to the common cold. *The New England Journal of Medicine*,  
1272 325(9), 606–612. <https://doi.org/10.1056/NEJM199108293250903>
- 1273 Craig, A. D. (2002). How do you feel? Interoception: the sense of the physiological  
1274 condition of the body. *Nature Reviews. Neuroscience*, 3(8), 655–666.  
1275 <https://doi.org/10.1038/nrn894>
- 1276 Czéh, B., Simon, M., Schmelting, B., Hiemke, C., & Fuchs, E. (2006). Astroglial  
1277 plasticity in the hippocampus is affected by chronic psychosocial stress and  
1278 concomitant fluoxetine treatment. *Neuropsychopharmacology: Official*  
1279 *Publication of the American College of Neuropsychopharmacology*, 31(8),  
1280 1616–1626. <https://doi.org/10.1038/sj.npp.1300982>
- 1281 Davatzikos, C. (2004). Why voxel-based morphometric analysis should be used with

- 1282 great caution when characterizing group differences. *NeuroImage*, 23(1), 17–  
1283 20. <https://doi.org/10.1016/j.neuroimage.2004.05.010>
- 1284 Dedovic, K., Engert, V., Duchesne, A., Lue, S. D., Andrews, J., Efanov, S. I.,  
1285 Beaudry, T., & Pruessner, J. C. (2010). Cortisol awakening response and  
1286 hippocampal volume: vulnerability for major depressive disorder? *Biological*  
1287 *Psychiatry*, 68(9), 847–853. <https://doi.org/10.1016/j.biopsych.2010.07.025>
- 1288 Dedovic, K., Rexroth, M., Wolff, E., Duchesne, A., Scherling, C., Beaudry, T., Lue, S.  
1289 D., Lord, C., Engert, V., & Pruessner, J. C. (2009). Neural correlates of  
1290 processing stressful information: an event-related fMRI study. *Brain Research*,  
1291 1293, 49–60. <https://doi.org/10.1016/j.brainres.2009.06.044>
- 1292 Dobrushina, O. R., Arina, G. A., Dobrynina, L. A., Novikova, E. S., Gubanova, M. V.,  
1293 Belopasova, A. V., ... Krotchenkova, M. V. (2021). Sensory integration in  
1294 interoception: Interplay between top-down and bottom-up processing. *Cortex*,  
1295 144, 185–197. <https://doi.org/10.1016/j.cortex.2021.08.009>
- 1296 Draganski B, Gaser C, Busch V, Schuierer G, Bogdahn U, May A. (2004)  
1297 Neuroplasticity: changes in grey matter induced by training. *Nature*, 427, 311–  
1298 312. <https://doi.org/10.1038/427311a>
- 1299 Eickhoff, S. B., Stephan, K. E., Mohlberg, H., Grefkes, C., Fink, G. R., Amunts, K., &  
1300 Zilles, K. (2005). A new SPM toolbox for combining probabilistic  
1301 cytoarchitectonic maps and functional imaging data. *NeuroImage*, 25(4), 1325–  
1302 1335. <https://doi.org/10.1016/j.neuroimage.2004.12.034>
- 1303 Engert, V., Efanov, S. I., Duchesne, A., Vogel, S., Corbo, V., & Pruessner, J. C.  
1304 (2013). Differentiating anticipatory from reactive cortisol responses to  
1305 psychosocial stress. *Psychoneuroendocrinology*, 38(8), 1328–1337.  
1306 <https://doi.org/10.1016/j.psyneuen.2012.11.018>
- 1307 Etkin, A., Egner, T., & Kalisch, R. (2011). Emotional processing in anterior cingulate  
1308 and medial prefrontal cortex. *Trends in Cognitive Sciences*, 15(2), 85–93.  
1309 <https://doi.org/10.1016/j.tics.2010.11.004>
- 1310 Forstmeier, W., & Schielzeth, H. (2011). Cryptic multiple hypotheses testing in linear  
1311 models: overestimated effect sizes and the winner's curse. *Behavioral Ecology*  
1312 *and Sociobiology*, 65(1), 47–55. <https://doi.org/10.1007/s00265-010-1038-5>

- 1313 Fox, J., & Weisberg, S. (2018). *An R Companion to Applied Regression*. SAGE  
1314 Publications. [https://play.google.com/store/books/details?id = SfNrDwAAQBAJ](https://play.google.com/store/books/details?id=SfNrDwAAQBAJ)
- 1315 Franklin, T. R., Wang, Z., Shin, J., Jagannathan, K., Suh, J. J., Detre, J. A., O'Brien,  
1316 C. P., & Childress, A. R. (2013). A VBM study demonstrating “apparent” effects  
1317 of a single dose of medication on T1-weighted MRIs. *Brain Structure &*  
1318 *Function*, 218(1), 97–104. <https://doi.org/10.1007/s00429-012-0385-6>
- 1319 Fullerton G.D., Potter, J.L., Dornbluth, N.C. NMR relaxation of protons in tissues and  
1320 other macromolecular water solutions. *Magnetic Resonance Imaging* 1982; 1:  
1321 209–228. [https://doi.org/10.1016/0730-725X\(82\)90172-2](https://doi.org/10.1016/0730-725X(82)90172-2)
- 1322 Garrett DD, Epp SM, Perry A, Lindenberger U. Local temporal variability reflects  
1323 functional integration in the human brain. *Neuroimage*. 2018 Dec;183:776-787.  
1324 doi: 10.1016/j.neuroimage.2018.08.019. Epub 2018 Aug 24.
- 1325 Gaudl, A., Kratzsch, J., Bae, Y. J., Kiess, W., Thiery, J., & Ceglarek, U. (2016).  
1326 Liquid chromatography quadrupole linear ion trap mass spectrometry for  
1327 quantitative steroid hormone analysis in plasma, urine, saliva and hair. *Journal*  
1328 *of Chromatography. A*, 1464, 64–71.  
1329 <https://doi.org/10.1016/j.chroma.2016.07.087>
- 1330 Gehrlach, D. A., Dolensek, N., Klein, A. S., Chowdhury, R. R., Matthys, A.,  
1331 Junghänel, M., Gaitanos, T. N., Podgornik, A., Black, T. D., Vaka, N. R.,  
1332 Conzelmann, K.-K., & Gogolla, N. (2019). Aversive state processing in the  
1333 posterior insular cortex. *Nature Neuroscience*, 22(9), 1424–1437.  
1334 <https://doi.org/10.1038/s41593-019-0469-1>
- 1335 Ge, Q., Peng, W., Zhang, J., Weng, X., Zhang, Y., Liu, T., Zang, Y.-F., & Wang, Z.  
1336 (2017). Short-term apparent brain tissue changes are contributed by cerebral  
1337 blood flow alterations. *PloS One*, 12(8), e0182182.  
1338 <https://doi.org/10.1371/journal.pone.0182182>
- 1339 Gould, E., Tanapat, P., McEwen, B. S., Flügge, G., & Fuchs, E. (1998). Proliferation  
1340 of granule cell precursors in the dentate gyrus of adult monkeys is diminished  
1341 by stress. *Proceedings of the National Academy of Sciences of the United*  
1342 *States of America*, 95(6), 3168–3171. <https://doi.org/10.1073/pnas.95.6.3168>
- 1343 Haddock B, Larsson HB, Hansen AE, Rostrup E. (2013) Measurement of brain

- 1344 oxygenation changes using dynamic T1-weighted imaging. *Neuroimage*, 78:7-  
1345 15. <https://doi.org/10.1016/j.neuroimage.2013.03.068>
- 1346 Heine, V. M., Maslam, S., Zareno, J., Joëls, M., & Lucassen, P. J. (2004).  
1347 Suppressed proliferation and apoptotic changes in the rat dentate gyrus after  
1348 acute and chronic stress are reversible. *The European Journal of Neuroscience*,  
1349 19(1), 131–144. <https://doi.org/10.1046/j.1460-9568.2003.03100.x>
- 1350 Herman, J. P., Figueiredo, H., Mueller, N. K., Ulrich-Lai, Y., Ostrander, M. M., Choi,  
1351 D. C., & Cullinan, W. E. (2003). Central mechanisms of stress integration:  
1352 hierarchical circuitry controlling hypothalamo–pituitary–adrenocortical  
1353 responsiveness. *Frontiers in Neuroendocrinology*, 24(3), 151–180.  
1354 <https://doi.org/10.1016/j.yfrne.2003.07.001>
- 1355 Hermans, E. J., Henckens, M. J. A. G., Joëls, M., & Fernández, G. (2014). Dynamic  
1356 adaptation of large-scale brain networks in response to acute stressors. *Trends*  
1357 *in Neurosciences*, 37(6), 304–314. <https://doi.org/10.1016/j.tins.2014.03.006>
- 1358 Het, S., Rohleder, N., Schoofs, D., Kirschbaum, C., & Wolf, O. T. (2009).  
1359 Neuroendocrine and psychometric evaluation of a placebo version of the “Trier  
1360 Social Stress Test.” In *Psychoneuroendocrinology*, 34(7), 1075–1086.  
1361 <https://doi.org/10.1016/j.psyneuen.2009.02.008>
- 1362 He, Y., Chen, Z. J., & Evans, A. C. (2007). Small-world anatomical networks in the  
1363 human brain revealed by cortical thickness from MRI. *Cerebral Cortex*, 17(10),  
1364 2407–2419. <https://doi.org/10.1093/cercor/bhl149>
- 1365 Höflich, A., Ganger, S., Tik, M., Hahn, A., Kranz, G. S., Vanicek, T., Spies, M.,  
1366 Kraus, C., Windischberger, C., Kasper, S., Winkler, D., & Lanzenberger, R.  
1367 (2017). Imaging the neuroplastic effects of ketamine with VBM and the  
1368 necessity of placebo control. In *NeuroImage*, 147, 198–203).  
1369 <https://doi.org/10.1016/j.neuroimage.2016.12.032>
- 1370 Holm, S. (1979). A simple sequentially rejective multiple test procedure.  
1371 *Scandinavian Journal of Statistics*, 6, 65–70.  
1372 <https://www.jstor.org/stable/4615733>.
- 1373 Jammal L, Whalley B, Barkai E. Learning-induced modulation of the effect of  
1374 neuroglial transmission on synaptic plasticity. *J Neurophysiol*. 2018 Jun



- 1375 1;119(6):2373-2379. doi: 10.1152/jn.00101.2018. Epub 2018 Mar 21.
- 1376 Jenkinson, M., Beckmann, C. F., Behrens, T. E. J., Woolrich, M. W., & Smith, S. M.  
1377 (2012). FSL. *NeuroImage*, 62(2), 782–790.  
1378 <https://doi.org/10.1016/j.neuroimage.2011.09.015>
- 1379 Joëls, M., Pasricha, N., & Karst, H. (2013). The interplay between rapid and slow  
1380 corticosteroid actions in brain. *European Journal of Pharmacology*, 719(1-3),  
1381 44–52. <https://doi.org/10.1016/j.ejphar.2013.07.015>
- 1382 Johansen-Berg, H., Baptista, C. S., & Thomas, A. G. (2012). Human structural  
1383 plasticity at record speed [Review of *Human structural plasticity at record*  
1384 *speed*]. *Neuron*, 73(6), 1058–1060.  
1385 <https://doi.org/10.1016/j.neuron.2012.03.001>
- 1386 Karch, J. D., Filevich, E., Wenger, E., Lisofsky, N., Becker, M., Butler, O.,  
1387 Mårtensson, J., Lindenberger, U., Brandmaier, A. M., & Kühn, S. (2019).  
1388 Identifying predictors of within-person variance in MRI-based brain volume  
1389 estimates. *NeuroImage*, 200, 575–589.  
1390 <https://doi.org/10.1016/j.neuroimage.2019.05.030>
- 1391 Karl, A., Schaefer, M., Malta, L. S., Dörfel, D., Rohleder, N., & Werner, A. (2006). A  
1392 meta-analysis of structural brain abnormalities in PTSD. *Neuroscience and*  
1393 *Biobehavioral Reviews*, 30(7), 1004–1031.  
1394 <https://doi.org/10.1016/j.neubiorev.2006.03.004>
- 1395 Kassem, M. S., Lagopoulos, J., Stait-Gardner, T., Price, W. S., Chohan, T. W.,  
1396 Arnold, J. C., Hatton, S. N., & Bennett, M. R. (2013). Stress-induced grey matter  
1397 loss determined by MRI is primarily due to loss of dendrites and their synapses.  
1398 *Molecular Neurobiology*, 47(2), 645–661. [https://doi.org/10.1007/s12035-012-](https://doi.org/10.1007/s12035-012-8365-7)  
1399 [8365-7](https://doi.org/10.1007/s12035-012-8365-7)
- 1400 Keifer, O. P., Jr, Hurt, R. C., Gutman, D. A., Keilholz, S. D., Gourley, S. L., &  
1401 Ressler, K. J. (2015). Voxel-based morphometry predicts shifts in dendritic  
1402 spine density and morphology with auditory fear conditioning. *Nature*  
1403 *Communications*, 6, 7582. <https://doi.org/10.1038/ncomms8582>
- 1404 Kemeny, M. E. (2003). The Psychobiology of Stress. In *Current Directions in*  
1405 *Psychological Science*, 12 (4), 124–129. <https://doi.org/10.1111/1467->



- 1406 8721.01246
- 1407 Kirschbaum, C., Pirke, K. M., & Hellhammer, D. H. (1993). The “Trier Social Stress  
1408 Test”--a tool for investigating psychobiological stress responses in a laboratory  
1409 setting. *Neuropsychobiology*, 28(1-2), 76–81. <https://doi.org/10.1159/000119004>
- 1410 Lanius, R. A., Williamson, P. C., Bluhm, R. L., Densmore, M., Boksman, K., Neufeld,  
1411 R. W. J., Gati, J. S., & Menon, R. S. (2005). Functional connectivity of  
1412 dissociative responses in posttraumatic stress disorder: a functional magnetic  
1413 resonance imaging investigation. *Biological Psychiatry*, 57(8), 873–884.  
1414 <https://doi.org/10.1016/j.biopsych.2005.01.011>
- 1415 Laux, L. (1981). *Das State-Trait-Angstinventar: theoret. Grundlagen u.*  
1416 *Handanweisung*.  
1417 [https://books.google.com/books/about/Das\\_State\\_Trait\\_Angstinventar.html?hl =](https://books.google.com/books/about/Das_State_Trait_Angstinventar.html?hl=&id=-sO6cQAACAAJ)  
1418 [&id = -sO6cQAACAAJ](https://books.google.com/books/about/Das_State_Trait_Angstinventar.html?hl=&id=-sO6cQAACAAJ)
- 1419 Laux, L., & Spielberger, C. D. (2001). *Das State-Trait-Angstinventar: STAI*.  
1420 [https://books.google.com/books/about/Das\\_State\\_Trait\\_Angstinventar.html?hl =](https://books.google.com/books/about/Das_State_Trait_Angstinventar.html?hl=&id=m1VTcgAACAAJ)  
1421 [&id = m1VTcgAACAAJ](https://books.google.com/books/about/Das_State_Trait_Angstinventar.html?hl=&id=m1VTcgAACAAJ)
- 1422 Lemogne, C., Gorwood, P., Bergouignan, L., Pélissolo, A., Lehericy, S., & Fossati, P.  
1423 (2011). Negative affectivity, self-referential processing and the cortical midline  
1424 structures. In *Social Cognitive and Affective Neuroscience*, 6 (4), 426–433.  
1425 <https://doi.org/10.1093/scan/nsq049>
- 1426 Lisofsky, N., Mårtensson, J., Eckert, A., Lindenberger, U., Gallinat, J., & Kühn, S.  
1427 (2015). Hippocampal volume and functional connectivity changes during the  
1428 female menstrual cycle. *NeuroImage*, 118, 154–162.  
1429 <https://doi.org/10.1016/j.neuroimage.2015.06.012>
- 1430 Lotze, M., Domin, M., Schmidt, C. O., Hosten, N., Grabe, H. J., & Neumann, N.  
1431 (2020). Income is associated with hippocampal/amygdala and education with  
1432 cingulate cortex grey matter volume. *Scientific Reports*, 10(1), 18786.  
1433 <https://doi.org/10.1038/s41598-020-75809-9>
- 1434 Lövdén, M., Bäckman, L., Lindenberger, U., Schaefer, S., & Schmiedek, F. (2010). A  
1435 theoretical framework for the study of adult cognitive plasticity. *Psychological*  
1436 *Bulletin*, 136 (4), 659–676. <https://doi.org/10.1037/a0020080>

- 1437 Lövdén, M., Wenger, E., Mårtensson, J., Lindenberger, U., & Bäckman, L. (2013).  
1438 Structural brain plasticity in adult learning and development. *Neuroscience and*  
1439 *Biobehavioral Reviews*, 37(9 Pt B), 2296–2310.  
1440 <https://doi.org/10.1016/j.neubiorev.2013.02.014>
- 1441 Luh, W.-M., Wong, E.C., Bandettini, E.C., Hyde, J.S. QUIPSS II with thin-slice T1<sub>ρ</sub>  
1442 periodic saturation: Method for improving accuracy of quantitative perfusion  
1443 imaging using pulsed arterial spin labeling. *Magnetic Resonance in Medicine*  
1444 1999; 41: 1246–1254. [https://doi.org/10.1002/\(SICI\)1522-2594\(199906\)41:6 <](https://doi.org/10.1002/(SICI)1522-2594(199906)41:6<1246::AID-MRM22>3.0.CO;2-N)  
1445 [1246::AID-MRM22 > 3.0.CO;2-N](https://doi.org/10.1002/(SICI)1522-2594(199906)41:6<1246::AID-MRM22>3.0.CO;2-N)
- 1446 Malik, M., Bigger, J. T., Camm, A. J., Kleiger, R. E., Malliani, A., Moss, A. J., &  
1447 Schwartz, P. J. (1996). Heart rate variability: Standards of measurement,  
1448 physiological interpretation, and clinical use. In *European Heart Journal*, 17 (3),  
1449 354–381. <https://doi.org/10.1093/oxfordjournals.eurheartj.a014868>
- 1450 Månsson, K. N. T., Cortes, D. S., Manzouri, A., Li, T.-Q., Hau, S., & Fischer, H.  
1451 (2020). Viewing Pictures Triggers Rapid Morphological Enlargement in the  
1452 Human Visual Cortex. *Cerebral Cortex*, 30(3), 851–857.  
1453 <https://doi.org/10.1093/cercor/bhz131>
- 1454 Marques, J. P., Kober, T., Krueger, G., van der Zwaag, W., Van de Moortele, P.-F.,  
1455 & Gruetter, R. (2010). MP2RAGE, a self bias-field corrected sequence for  
1456 improved segmentation and T1-mapping at high field. *NeuroImage*, 49(2),  
1457 1271–1281. <https://doi.org/10.1016/j.neuroimage.2009.10.002>
- 1458 Mathôt, S., Schreij, D., & Theeuwes, J. (2012). OpenSesame: an open-source,  
1459 graphical experiment builder for the social sciences. *Behavior Research*  
1460 *Methods*, 44(2), 314–324. <https://doi.org/10.3758/s13428-011-0168-7>
- 1461 Mathur-De Vré, R. (1984). Biomedical implications of the relaxation behaviour of  
1462 water related to NMR imaging. *The British Journal of Radiology*, 57(683), 955–  
1463 976. <https://doi.org/10.1259/0007-1285-57-683-955>
- 1464 McEwen, B. S. (2005). Glucocorticoids, depression, and mood disorders: structural  
1465 remodeling in the brain. *Metabolism: Clinical and Experimental*, 54(5 Suppl 1),  
1466 20–23. <https://doi.org/10.1016/j.metabol.2005.01.008>
- 1467 McEwen, B. S., & Gianaros, P. J. (2010). Central role of the brain in stress and

- 1468 adaptation: links to socioeconomic status, health, and disease. *Annals of the*  
1469 *New York Academy of Sciences*, 1186, 190–222. [https://doi.org/10.1111/j.1749-](https://doi.org/10.1111/j.1749-6632.2009.05331.x)  
1470 6632.2009.05331.x
- 1471 McEwen, B. S., & Gianaros, P. J. (2011). Stress- and allostasis-induced brain  
1472 plasticity. *Annual Review of Medicine*, 62, 431–445.  
1473 <https://doi.org/10.1146/annurev-med-052209-100430>
- 1474 McKlveen, J. M., Myers, B., & Herman, J. P. (2015). The medial prefrontal cortex:  
1475 coordinator of autonomic, neuroendocrine and behavioural responses to stress.  
1476 *Journal of Neuroendocrinology*, 27(6), 446–456.  
1477 <https://doi.org/10.1111/jne.12272>
- 1478 Miller, R., Plessow, F., Kirschbaum, C., & Stalder, T. (2013). Classification criteria for  
1479 distinguishing cortisol responders from nonresponders to psychosocial stress:  
1480 evaluation of salivary cortisol pulse detection in panel designs. *Psychosomatic*  
1481 *Medicine*, 75(9), 832–840. <https://doi.org/10.1097/PSY.0000000000000002>
- 1482 Mouches, P., & Forkert, N. D. (2019). A statistical atlas of cerebral arteries  
1483 generated using multi-center MRA datasets from healthy subjects. *Scientific*  
1484 *Data*, 6(1), 29. <https://doi.org/10.1038/s41597-019-0034-5>
- 1485 Nader, N., Chrousos, G. P., & Kino, T. (2010). Interactions of the circadian CLOCK  
1486 system and the HPA axis. *Trends in Endocrinology and Metabolism: TEM*,  
1487 21(5), 277–286. <https://doi.org/10.1016/j.tem.2009.12.011>
- 1488 Naegel, S., Hagenacker, T., Theysohn, N., Diener, H. C., Katsarava, Z., Obermann,  
1489 M., & Holle, D. (2017). Short Latency Gray Matter Changes in Voxel-Based  
1490 Morphometry following High Frequent Visual Stimulation. *Neural plasticity*,  
1491 2017, 1397801. <https://doi.org/10.1155/2017/1397801>
- 1492 Nakamura, K., Brown, R. A., Narayanan, S., Collins, D. L., Arnold, D. L., &  
1493 Alzheimer's Disease Neuroimaging Initiative. (2015). Diurnal fluctuations in  
1494 brain volume: Statistical analyses of MRI from large populations. *NeuroImage*,  
1495 118, 126–132. <https://doi.org/10.1016/j.neuroimage.2015.05.077>
- 1496 Nesse, R. M., Bhatnagar, S., & Ellis, B. (2016). Evolutionary Origins and Functions  
1497 of the Stress Response System. In *Stress: Concepts, Cognition, Emotion, and*  
1498 *Behavior* (pp. 95–101). <https://doi.org/10.1016/b978-0-12-800951-2.00011-x>

- 1499 Nicolaidis, N. C., Charmandari, E., Chrousos, G. P., & Kino, T. (2014). Circadian  
1500 endocrine rhythms: the hypothalamic-pituitary-adrenal axis and its actions.  
1501 *Annals of the New York Academy of Sciences*, 1318, 71–80.  
1502 <https://doi.org/10.1111/nyas.12464>
- 1503 Nierhaus, T., Vidaurre, C., Sannelli, C., Mueller, K.-R., & Villringer, A. (2021).  
1504 Immediate brain plasticity after one hour of brain-computer interface (BCI). *The*  
1505 *Journal of Physiology*, 599(9), 2435–2451. <https://doi.org/10.1113/JP278118>
- 1506 Northoff, G., & Bermpohl, F. (2004). Cortical midline structures and the self. *Trends*  
1507 *in Cognitive Sciences*, 8(3), 102–107. <https://doi.org/10.1016/j.tics.2004.01.004>
- 1508 Orban, C., Kong, R., Li, J., Chee, M. W. L., & Yeo, B. T. T. (2020). Time of day is  
1509 associated with paradoxical reductions in global signal fluctuation and functional  
1510 connectivity. *PLoS Biology*, 18(2), e3000602.  
1511 <https://doi.org/10.1371/journal.pbio.3000602>
- 1512 Olivo, G., Lövdén, M., Manzouri, A., Terlau, L., Jenner, B., Jafari, A., ... Månsson, K.  
1513 N. T. (2022). Estimated gray matter volume rapidly changes after a short motor  
1514 task. *Cerebral Cortex*, 32(19), 4356–4369.  
1515 <https://doi.org/10.1093/cercor/bhab488>
- 1516 Papagni, S. A., Benetti, S., Arulanantham, S., McCrory, E., McGuire, P., & Mechelli,  
1517 A. (2011). Effects of stressful life events on human brain structure: a longitudinal  
1518 voxel-based morphometry study. *Stress*, 14(2), 227–232.  
1519 <https://doi.org/10.3109/10253890.2010.522279>
- 1520 Patz, M. D., Day, H. E., Burow, A., & Campeau, S. (2006). Modulation of the  
1521 hypothalamo–pituitary–adrenocortical axis by caffeine.  
1522 *Psychoneuroendocrinology*, 31(4), 493-500.  
1523 <https://doi.org/10.1016/j.psyneuen.2005.11.008>.
- 1524 Power, J. D., Schlaggar, B. L., & Petersen, S. E. (2015). Recent progress and  
1525 outstanding issues in motion correction in resting state fMRI. *NeuroImage*, 105,  
1526 536–551. <https://doi.org/10.1016/j.neuroimage.2014.10.044>
- 1527 Pruessner, J. C., Dedovic, K., Khalili-Mahani, N., Engert, V., Pruessner, M., Buss,  
1528 C., Renwick, R., Dagher, A., Meaney, M. J., & Lupien, S. (2008). Deactivation of  
1529 the limbic system during acute psychosocial stress: evidence from positron

- 1530 emission tomography and functional magnetic resonance imaging studies.  
1531 *Biological Psychiatry*, 63(2), 234–240.  
1532 <https://doi.org/10.1016/j.biopsych.2007.04.041>
- 1533 Radley, J., Morilak, D., Viau, V., & Campeau, S. (2015). Chronic stress and brain  
1534 plasticity: Mechanisms underlying adaptive and maladaptive changes and  
1535 implications for stress-related CNS disorders. *Neuroscience and Biobehavioral*  
1536 *Reviews*, 58, 79–91. <https://doi.org/10.1016/j.neubiorev.2015.06.018>
- 1537 Reinelt, J., Uhlig, M., Müller, K., Lauckner, M. E., Kumral, D., Schaare, H. L.,  
1538 Baczkowski, B. M., Babayan, A., Erbey, M., Roebbig, J., Reiter, A., Bae, Y.-J.,  
1539 Kratzsch, J., Thiery, J., Hendler, T., Villringer, A., & Gaebler, M. (2019). Acute  
1540 psychosocial stress alters thalamic network centrality. *NeuroImage*, 199, 680–  
1541 690. <https://doi.org/10.1016/j.neuroimage.2019.06.005>
- 1542 Reuter, M., Tisdall, M. D., Qureshi, A., Buckner, R. L., van der Kouwe, A. J. W., &  
1543 Fischl, B. (2015). Head motion during MRI acquisition reduces gray matter  
1544 volume and thickness estimates. *NeuroImage*, 107, 107–115.  
1545 <https://doi.org/10.1016/j.neuroimage.2014.12.006>
- 1546 Rogers, M. A., Yamasue, H., Abe, O., Yamada, H., Ohtani, T., Iwanami, A., Aoki, S.,  
1547 Kato, N., & Kasai, K. (2009). Smaller amygdala volume and reduced anterior  
1548 cingulate gray matter density associated with history of post-traumatic stress  
1549 disorder. *Psychiatry Research*, 174(3), 210–216.  
1550 <https://doi.org/10.1016/j.psychresns.2009.06.001>
- 1551 Sagi, Y., Tavor, I., Hofstetter, S., Tzur-Moryosef, S., Blumenfeld-Katzir, T., & Assaf,  
1552 Y. (2012). Learning in the fast lane: new insights into neuroplasticity. *Neuron*,  
1553 73(6), 1195–1203. <https://doi.org/10.1016/j.neuron.2012.01.025>
- 1554 Savic, I. (2015). Structural changes of the brain in relation to occupational stress.  
1555 *Cerebral Cortex*, 25(6), 1554–1564. <https://doi.org/10.1093/cercor/bht348>
- 1556 Schielzeth, H. (2010). Simple means to improve the interpretability of regression  
1557 coefficients. In *Methods in Ecology and Evolution*, 1 (2), 103–113.  
1558 <https://doi.org/10.1111/j.2041-210x.2010.00012.x>
- 1559 Seeley, W. W. (2019). The Salience Network: A Neural System for Perceiving and  
1560 Responding to Homeostatic Demands. *The Journal of Neuroscience: The*

- 1561 *Official Journal of the Society for Neuroscience*, 39(50), 9878–9882.  
1562 <https://doi.org/10.1523/JNEUROSCI.1138-17.2019>
- 1563 Shao, Y., & McCarthy, K. D. (1994). Plasticity of astrocytes. *Glia*, 11(2), 147–155.  
1564 <https://doi.org/10.1002/glia.440110209>
- 1565 Spalletta, G., Piras, F., Caltagirone, C., & Fagioli, S. (2014). Hippocampal  
1566 multimodal structural changes and subclinical depression in healthy individuals.  
1567 *Journal of Affective Disorders*, 152-154, 105–112.  
1568 <https://doi.org/10.1016/j.jad.2013.05.068>
- 1569 Streitbürger, D.-P., Möller, H. E., Tittgemeyer, M., Hund-Georgiadis, M., Schroeter,  
1570 M. L., & Mueller, K. (2012). Investigating structural brain changes of dehydration  
1571 using voxel-based morphometry. *PloS One*, 7(8), e44195.  
1572 <https://doi.org/10.1371/journal.pone.0044195>
- 1573 Streitbürger, D.-P., Pampel, A., Krueger, G., Lepsien, J., Schroeter, M.L., Mueller,  
1574 K., Möller, H.E. Impact of image acquisition on voxel-based morphometry  
1575 investigations of age-related structural brain changes. *NeuroImage* 2014; 87:  
1576 170–182. <https://doi.org/10.1016/j.neuroimage.2013.10.051>
- 1577 Suffren, S., La Buissonnière-Ariza, V., Tucholka, A., Nassim, M., Séguin, J. R.,  
1578 Boivin, M., Kaur Singh, M., Foland-Ross, L. C., Lepore, F., Gotlib, I. H.,  
1579 Tremblay, R. E., & Maheu, F. S. (2021). Prefrontal cortex and amygdala  
1580 anatomy in youth with persistent levels of harsh parenting practices and  
1581 subclinical anxiety symptoms over time during childhood. *Development and*  
1582 *Psychopathology*, 1–12. <https://doi.org/10.1017/S0954579420001716>
- 1583 Syková, E. (1997). The Extracellular Space in the CNS: Its Regulation, Volume and  
1584 Geometry in Normal and Pathological Neuronal Function. *The Neuroscientist*,  
1585 3(1), 28–41. <https://doi.org/10.1177/107385849700300113>
- 1586 Tardif, C. L., Steele, C. J., Lampe, L., Bazin, P.-L., Ragert, P., Villringer, A., &  
1587 Gauthier, C. J. (2017). Investigation of the confounding effects of vasculature  
1588 and metabolism on computational anatomy studies. *NeuroImage*, 149, 233–  
1589 243. <https://doi.org/10.1016/j.neuroimage.2017.01.025>
- 1590 Tasker, J. G., & Herman, J. P. (2011). Mechanisms of rapid glucocorticoid feedback  
1591 inhibition of the hypothalamic-pituitary-adrenal axis. *Stress*, 14(4), 398–406.



- 1592 <https://doi.org/10.3109/10253890.2011.586446>
- 1593 Taubert, M., Mehnert, J., Pleger, B., & Villringer, A. (2016). Rapid and specific gray  
1594 matter changes in M1 induced by balance training. *NeuroImage*, *133*, 399–407.  
1595 <https://doi.org/10.1016/j.neuroimage.2016.03.017>
- 1596 Thayer, J. F., & Lane, R. D. (2000). A model of neurovisceral integration in emotion  
1597 regulation and dysregulation. *Journal of Affective Disorders*, *61*(3), 201–216.  
1598 [https://doi.org/10.1016/S0165-0327\(00\)00338-4](https://doi.org/10.1016/S0165-0327(00)00338-4)
- 1599 Thomas, A. G., Dennis, A., Rawlings, N. B., Stagg, C. J., Matthews, L., Morris, M.,  
1600 Kolind, S. H., Foxley, S., Jenkinson, M., Nichols, T. E., Dawes, H., Bandettini, P.  
1601 A., & Johansen-Berg, H. (2016). Multi-modal characterization of rapid anterior  
1602 hippocampal volume increase associated with aerobic exercise. *NeuroImage*,  
1603 *131*, 162–170. <https://doi.org/10.1016/j.neuroimage.2015.10.090>
- 1604 Thomas, C., Sadeghi, N., Nayak, A., Trefler, A., Sarlls, J., Baker, C. I., & Pierpaoli,  
1605 C. (2018). Impact of time-of-day on diffusivity measures of brain tissue derived  
1606 from diffusion tensor imaging. *NeuroImage*, *173*, 25–34.  
1607 <https://doi.org/10.1016/j.neuroimage.2018.02.026>
- 1608 Trefler, A., Sadeghi, N., Thomas, A. G., Pierpaoli, C., Baker, C. I., & Thomas, C.  
1609 (2016). Impact of time-of-day on brain morphometric measures derived from T1-  
1610 weighted magnetic resonance imaging. *NeuroImage*, *133*, 41–52.  
1611 <https://doi.org/10.1016/j.neuroimage.2016.02.034>
- 1612 Tremblay MÈ, Lowery RL, Majewska AK. Microglial interactions with synapses are  
1613 modulated by visual experience. *PLoS Biol.* 2010 Nov 2;*8*(11):e1000527. doi:  
1614 [10.1371/journal.pbio.1000527](https://doi.org/10.1371/journal.pbio.1000527).
- 1615 Tsigos, C., & Chrousos, G. P. (2002). Hypothalamic-pituitary-adrenal axis,  
1616 neuroendocrine factors and stress. *Journal of Psychosomatic Research*, *53*(4),  
1617 865–871. [https://doi.org/10.1016/s0022-3999\(02\)00429-4](https://doi.org/10.1016/s0022-3999(02)00429-4)
- 1618 Tynan, R. J., Beynon, S. B., Hinwood, M., Johnson, S. J., Nilsson, M., Woods, J. J.,  
1619 & Walker, F. R. (2013). Chronic stress-induced disruption of the astrocyte  
1620 network is driven by structural atrophy and not loss of astrocytes. *Acta*  
1621 *Neuropathologica*, *126*(1), 75–91. <https://doi.org/10.1007/s00401-013-1102-0>
- 1622 Sofie L. Valk, Ting Xu, Casey Paquola, Bo-yong Park, Richard A. I. Bethlehem,



- 1623 Reinder Vos de Wael, Jessica Royer, Shahrzad Kharabian Masouleh, Şeyma  
1624 Bayrak, Peter Kochunov, B. T. Thomas Yeo, Daniel Margulies, Jonathan  
1625 Smallwood, Simon B. Eickhoff & Boris C. Bernhardt. (2022) Genetic and  
1626 phylogenetic uncoupling of structure and function in human transmodal cortex.  
1627 *Nat Commun* **13**, 2341. <https://doi.org/10.1038/s41467-022-29886-1>
- 1628 Van Cauter, E., & Refetoff, S. (1985). Evidence for Two Subtypes of Cushing's  
1629 Disease Based on the Analysis of Episodic Cortisol Secretion. *New England*  
1630 *Journal of Medicine*, 312 (21), 1343–1349.  
1631 <https://doi.org/10.1056/nejm198505233122102>
- 1632 Veer, I. M., Oei, N. Y. L., Spinhoven, P., van Buchem, M. A., Elzinga, B. M., &  
1633 Rombouts, S. A. R. B. (2011). Beyond acute social stress: increased functional  
1634 connectivity between amygdala and cortical midline structures. *NeuroImage*,  
1635 57(4), 1534–1541. <https://doi.org/10.1016/j.neuroimage.2011.05.074>
- 1636 Veer, I. M., Oei, N. Y. L., Spinhoven, P., van Buchem, M. A., Elzinga, B. M., &  
1637 Rombouts, S. A. R. B. (2012). Endogenous cortisol is associated with functional  
1638 connectivity between the amygdala and medial prefrontal cortex.  
1639 *Psychoneuroendocrinology*, 37(7), 1039–1047.  
1640 <https://doi.org/10.1016/j.psyneuen.2011.12.001>
- 1641 Vining, R. F., McGinley, R. A., Maksvytis, J. J., & Ho, K. Y. (1983). Salivary cortisol:  
1642 a better measure of adrenal cortical function than serum cortisol. *Annals of*  
1643 *Clinical Biochemistry*, 20 (Pt 6), 329–335.  
1644 <https://doi.org/10.1177/000456328302000601>
- 1645 Wang, J., Rao, H., Wetmore, G. S., Furlan, P. M., Korczykowski, M., Dinges, D. F., &  
1646 Detre, J. A. (2005). Perfusion functional MRI reveals cerebral blood flow pattern  
1647 under psychological stress. *Proceedings of the National Academy of Sciences*  
1648 *of the United States of America*, 102(49), 17804–17809.  
1649 <https://doi.org/10.1073/pnas.0503082102>
- 1650 Wheelock, M. D., Harnett, N. G., Wood, K. H., Orem, T. R., Granger, D. A., Mrug, S.,  
1651 & Knight, D. C. (2016). Prefrontal Cortex Activity Is Associated with  
1652 Biobehavioral Components of the Stress Response. *Frontiers in Human*  
1653 *Neuroscience*, 10, 583. <https://doi.org/10.3389/fnhum.2016.00583>

- 1654 Wickham, H. (2009). *ggplot2: Elegant Graphics for Data Analysis*. Springer Science  
1655 & Business Media. [https://play.google.com/store/books/details?id=bes-](https://play.google.com/store/books/details?id=bes-AAAAQBAJ)  
1656 [AAAAQBAJ](https://play.google.com/store/books/details?id=bes-AAAAQBAJ)
- 1657 Wong, E.C., Buxton, R.B., Frank, L.R. Implementation of quantitative perfusion  
1658 imaging techniques for functional brain mapping using pulsed arterial spin  
1659 labeling. *NMR in Biomedicine* 1997; 10: 237–249.  
1660 [https://doi.org/10.1002/\(SICI\)1099-1492\(199706/08\)10:4/5 < 237::AID-NBM475](https://doi.org/10.1002/(SICI)1099-1492(199706/08)10:4/5<237::AID-NBM475)  
1661  [> 3.0.CO;2-X](https://doi.org/10.1002/(SICI)1099-1492(199706/08)10:4/5<237::AID-NBM475)
- 1662 Wright, P. J., Mougín, O. E., Totman, J. J., Peters, A. M., Brookes, M. J., Coxon, R.,  
1663 Morris, P. E., Clemence, M., Francis, S. T., Bowtell, R. W., & Gowland, P. A.  
1664 (2008). Water proton T 1 measurements in brain tissue at 7, 3, and 1.5T using  
1665 IR-EPI, IR-TSE, and MPRAGE: results and optimization. *Magnetic Resonance*  
1666 *Materials in Physics, Biology and Medicine*, 21 (1-2), 121–130.  
1667 <https://doi.org/10.1007/s10334-008-0104-8>
- 1668 Natalia Zaretskaya, Erik Fink, Ana Arsenovic, Anja Ischebeck (2022).  
1669 Fast and functionally specific cortical thickness changes induced by visual  
1670 stimulation (2022), *Cerebral Cortex*, *bhac244*,  
1671 <https://doi.org/10.1093/cercor/bhac244>
- 1672 Zatorre, R. J., Fields, R. D., & Johansen-Berg, H. (2012). Plasticity in gray and white:  
1673 neuroimaging changes in brain structure during learning. *Nature Neuroscience*,  
1674 15(4), 528–536. <https://doi.org/10.1038/nn.3045>
- 1675 Zoraghi M, Scherf N, Jaeger C, Sack I, Hirsch S, Hetzer S, Weiskopf N. Simulating  
1676 Local Deformations in the Human Cortex Due to Blood Flow-Induced Changes  
1677 in Mechanical Tissue Properties: Impact on Functional Magnetic Resonance  
1678 Imaging. *Front Neurosci*. 2021 Sep 21;15:722366. doi:  
1679 [10.3389/fnins.2021.722366](https://doi.org/10.3389/fnins.2021.722366).
- 1680
